# Supplementary material for: Perceived barriers to leisure time physical activity in adults with type 2 diabetes attending primary healthcare in Oman: a cross-sectional survey
Source: PubMed Central journal article supplement — BMJ Open. 2017 Nov 3;7(11):e016946. doi: 10.1136/bmjopen-2017-016946 (PMC5722082; doi:10.1136/bmjopen-2017-016946), 2017-11-03
Supplement: bmjopen-2017-016946.draft_revisions.pdf [file bmjopen-2017-016946.draft_revisions.pdf]

# BMJ Open

BMJ Open is committed to open peer review. As part of this commitment we make the peer review history of every article we publish publicly available.

When an article is published we post the peer reviewers' comments and the authors' responses online. We also post the versions of the paper that were used during peer review. These are the versions that the peer review comments apply to.

The versions of the paper that follow are the versions that were submitted during the peer review process. They are not the versions of record or the final published versions. They should not be cited or distributed as the published version of this manuscript.

BMJ Open is an open access journal and the full, final, typeset and author-corrected version of record of the manuscript is available on our site with no access controls, subscription charges or pay-per-view fees (<http://bmjopen.bmj.com>).

If you have any questions on BMJ Open's open peer review process please email [editorial.bmjopen@bmj.com](mailto:editorial.bmjopen@bmj.com)

# BMJ Open

## Perceived barriers to leisure time physical activity in adults with type 2 diabetes attending primary health care in Oman

|                                 |                                                                                                                                                                                                                                                                                                                                                                                                                                                                                                                                                                                       |
|---------------------------------|---------------------------------------------------------------------------------------------------------------------------------------------------------------------------------------------------------------------------------------------------------------------------------------------------------------------------------------------------------------------------------------------------------------------------------------------------------------------------------------------------------------------------------------------------------------------------------------|
| Journal:                        | <i>BMJ Open</i>                                                                                                                                                                                                                                                                                                                                                                                                                                                                                                                                                                       |
| Manuscript ID                   | bmjopen-2017-016946                                                                                                                                                                                                                                                                                                                                                                                                                                                                                                                                                                   |
| Article Type:                   | Research                                                                                                                                                                                                                                                                                                                                                                                                                                                                                                                                                                              |
| Date Submitted by the Author:   | 22-Mar-2017                                                                                                                                                                                                                                                                                                                                                                                                                                                                                                                                                                           |
| Complete List of Authors:       | Alghafri, Thamra; Ministry of Health, Planning<br>Alharthi, Saud; Ministry of Health, Medicine<br>Al-Farsi, Yahya; Sultan Qaboos University College of Medicine and Health Science, FAMCO<br>Bannerman, Elaine; Ninewells Hospital and Medical School., Centre for Public Health Nutrition Research, University of Dundee<br>Craigie, Angela; Centre for Research into Cancer Prevention and Screening, Medical Research Institute, University of Dundee<br>Anderson, Annie; Ninewells Hospital and Medical School, Centre for Public Health Nutrition Research, University of Dundee |
| <b>Primary Subject Heading</b>: | Diabetes and endocrinology                                                                                                                                                                                                                                                                                                                                                                                                                                                                                                                                                            |
| Secondary Subject Heading:      | Sports and exercise medicine                                                                                                                                                                                                                                                                                                                                                                                                                                                                                                                                                          |
| Keywords:                       | Physical Activity, Type 2 diabetes, Primary health care, Barriers, Oman, General diabetes < DIABETES & ENDOCRINOLOGY, PUBLIC HEALTH, SPORTS MEDICINE                                                                                                                                                                                                                                                                                                                                                                                                                                  |
|                                 |                                                                                                                                                                                                                                                                                                                                                                                                                                                                                                                                                                                       |

SCHOLARONE™  
Manuscripts

only

1  
2  
3  
4  
5  
6  
7  
8  
9  
10  
11  
12  
13  
14  
15  
16  
17  
18  
19  
20  
21  
22  
23  
24  
25  
26  
27  
28  
29  
30  
31  
32  
33  
34  
35  
36  
37  
38  
39  
40  
41  
42  
43  
44  
45  
46  
47  
48  
49  
50  
51  
52  
53  
54  
55  
56  
57  
58  
59  
60

**Perceived barriers to leisure time physical activity in adults with type 2 diabetes  
attending primary health care in Oman**

Thamra S Alghafri<sup>1\*</sup>, Saud M Alharthi<sup>1</sup>, Yahya Al-farsi<sup>2</sup>, Elaine Bannerman<sup>3</sup>, Angela M  
Craigie<sup>3</sup>, Annie S Anderson<sup>3</sup>

<sup>1</sup>Directorate General of Health Services, Ministry of Health, Muscat, Oman.

<sup>2</sup>Department of Family Medicine and Public Health, College of Medicine and Health  
Sciences, Sultan Qaboos University, Oman.

<sup>3</sup>Centre for Public Health Nutrition Research, University of Dundee, Ninewells Hospital  
and Medical School.

\*Corresponding author: Thamra S Alghafri (TSA) PO Box 2723, Postal Code 112,  
Oman, email: [tsalghafri@dundee.ac.uk](mailto:tsalghafri@dundee.ac.uk), Telephone number 0096899376455

Email addresses:

Saud M Alharthi (SMA): [smsbar07@gmail.com](mailto:smsbar07@gmail.com)

Yahya Al-farsi (YMF): [ymfarsi@gmail.com](mailto:ymfarsi@gmail.com)

Elaine Bannerman (EB): [e.bannerman@dundee.ac.uk](mailto:e.bannerman@dundee.ac.uk)

Angela M. Craigie (AMC): [a.craigie@dundee.ac.uk](mailto:a.craigie@dundee.ac.uk)

Annie S Anderson (ASA): [a.s.anderson@dundee.ac.uk](mailto:a.s.anderson@dundee.ac.uk)

**WORD COUNT:** 3396

**COPYRIGHT:** The Corresponding Author has the right to grant on behalf of all  
authors and does grant on behalf of all authors, an exclusive licence on a worldwide  
basis to the BMJ Publishing Group Ltd to permit this article (if accepted) to be  
published in BMJ editions and any other BMJ PGL products and sublicences such use  
and exploit all subsidiary rights, as set out in our licence.

1  
2  
3  
4  
5  
6  
7  
8  
9  
10  
11  
12  
13  
14  
15  
16  
17  
18  
19  
20  
21  
22  
23  
24  
25  
26  
27  
28  
29  
30  
31  
32  
33  
34  
35  
36  
37  
38  
39  
40  
41  
42  
43  
44  
45  
46  
47  
48  
49  
50  
51  
52  
53  
54  
55  
56  
57  
58  
59  
60

**TRANSPARENCY DECLARATION:** This manuscript is an honest, accurate, and transparent account of the study being reported. There are no important aspects of the study that are omitted; and any possible discrepancies from the study are explained.

**TECHNICAL APPENDIX:** Data generated from this study is not available for public use. However it is available from the corresponding author on reasonable request and approvals from Oman Ministry of Health.

**FUNDING:** The Oman Ministry of Health funded this project.

**CONFLICTS OF INTEREST:** No competing interests.

## ABSTRACT

**Objectives:** Physical activity is fundamental in diabetes management for good metabolic control. This study explored perceived barriers to performing leisure time physical activity and associated factors in adults with type 2 diabetes in Oman.

**Design:** Cross-sectional study using an Arabic version of the “Barriers to Being Active” questionnaire, socio-demographic information and questions on perceived stages of change in physical activity.

**Setting:** Seventeen primary health care centres randomly selected in Muscat.

**Participants:** Individuals >18 years with type 2 diabetes, attending diabetes clinic for > 2 years and with no contraindications to performing physical activity.

### Primary and secondary outcome measures:

Participants were asked to rate how far different factors influenced their physical activity, under the following categories: fear of injury, lack of time, social support, energy, willpower, skills, resources, religion and environment. On a scale of 0-9, barriers were considered important if scored  $\geq 5$ . Chi-square test was carried out to

determine differences in proportions of high barrier scores across socio-demographic factors and self-reported stages of physical activity.

**Results:** A total of 305 questionnaires were collected. Most (96%) reported at least one barrier to performing leisure time physical activity. Lack of willpower (44.4%), lack of resources (30.5%) and lack of social support (29.2%) were the most frequently reported barriers. Lack of willpower was significantly different in individuals with low vs high income (54.2% vs 40%,  $P=0.002$ ) and in those reporting inactive vs active stages of change for physical activity (50.7% vs 34.7%,  $P=0.029$ ), lack of resources was significantly different in those with low vs high income (40% vs 24.3%,  $P=0.004$ ) and married vs unmarried (33.8% vs 18.5%,  $P=0.018$ ). Lack of social support was significant in females vs males (35.4% vs 20.8%,  $P=0.005$ ).

**Conclusions:** These findings suggest that physical activity interventions should be cost neutral and target psycho-social factors including self-efficacy and social support.

**Key words:** Physical Activity, Type 2 diabetes, Primary health care, Barriers, Oman

## ARTICLE SUMMARY

### Strengths and limitations of this study

- Barriers to performing leisure physical activity for adults with type 2 diabetes were investigated in Oman where prevalence of both diabetes and physical inactivity is high.
- Questions on possible barriers to performing physical activity linked to religion and environment were included.
- The tool used in this study was an English to Arabic language translated questionnaire that may have affected the validity of questions.
- The subjective nature of self-reports may have limited the accuracy of outcomes.

## INTRODUCTION

Oman has witnessed enormous economic advancement in recent decades, along with significant increases in non-communicable diseases including a rising prevalence of diabetes. Diabetes prevalence in Oman has increased from 8.3% in 1991 to 12.3% in 2008 and recent estimates are in the order of 14.8%, exceeding global rates.<sup>1 2</sup> The World Health Organization (WHO) has indicated that physical inactivity is one of the top ten leading global causes of mortality and disability worldwide, and the principal cause for approximately 27% of diabetes, and approximately 30% of ischemic heart disease.<sup>3</sup> In Oman, it has been reported that almost 70% of the population are physically inactive (daily activity of  $\leq 10$  minutes).<sup>4</sup> This raises concerns regarding the impact these high levels of physical inactivity may be having on lifestyle related chronic diseases including diabetes, on health care expenditures and overall population health.<sup>5</sup>

The protective effects of physical activity (PA) in the management of diabetes, specifically type 2 diabetes (T2D), have been widely reported.<sup>6 7</sup> WHO recommends at least 150 minutes of moderate to vigorous physical activity or 75 minutes of vigorous PA/week.<sup>8</sup> However, over 60% of patients with diabetes in western countries do not meet the recommended levels of PA.<sup>9 10</sup> The Oman World Health Survey (OWHS) 2008, reported that in Oman, only 15% of patients with diabetes (98% of them with type 2 diabetes) met PA recommendations using the Global Physical Activity Questionnaire (GPAQ).<sup>2</sup>

The importance of leisure time PA in meeting PA recommendations is consistently<sup>11</sup> associated with reduced mortality risks (20% to >37% risk reduction) and favourable cardiovascular outcomes.<sup>12</sup> This relationship appears to have a dose-response effect where the upper threshold for mortality benefit occurs at 3 to 5 times the leisure PA recommendations of 7.5-<15 MET h/wk.<sup>12</sup> No clear association is observed for occupational or travel physical activity.<sup>13</sup>

1  
2  
3  
4  
5  
6  
7  
8  
9  
10  
11  
12  
13  
14  
15  
16  
17  
18  
19  
20  
21  
22  
23  
24  
25  
26  
27  
28  
29  
30  
31  
32  
33  
34  
35  
36  
37  
38  
39  
40  
41  
42  
43  
44  
45  
46  
47  
48  
49  
50  
51  
52  
53  
54  
55  
56  
57  
58  
59  
60

Theoretical models underpinning effective interventions to promote personalized PA (contents, methods and approaches) should focus on benefits and ways to overcome barriers to PA.<sup>14</sup> Literature to date mainly from western countries has reported a number of potential barriers to performing PA in adults with diabetes. These include lack of time,<sup>15-18</sup> physical constraints including pain,<sup>19</sup> lack of knowledge and limited facilities.<sup>20</sup> Differences in reporting barriers to PA have been noted across genders, age groups, environments, cultures and disease status. Female gender, increasing age, unsafe neighbourhoods, being overweight and being a smoker increased the odds of reporting barriers to PA among migrant populations like African Americans, South Asian British and Mexican Americans.<sup>21-23</sup> In the Arab countries, modest evidence on barriers to PA in both the general population and in adults with T2D suggests that lack of time, co-existing diseases and adverse weather conditions<sup>14 24-29</sup> are the main factors. However, more information is required on barriers to physical activity in the Arabian Peninsula specifically the countries of the Gulf Cooperation Council (GCC) where culture, tradition, and environment are distinctive.

The current study aimed to identify significant barriers to performing leisure-time PA in adults with T2D in Oman, and associations with sociodemographic factors and perceived stages of change in PA.

## **METHODS**

### **Study design, setting and participants**

This cross-sectional interview based study was part of a larger study that examined correlates of physical activity and sitting time in adults with type 2 diabetes, and barriers to leisure physical activity in the same population. Results regarding the PA patterns of the population using the GPAQ are reported elsewhere.<sup>30</sup> This current paper identifies barriers to performing leisure physical activity expressed by Omani adults

1  
2 with T2D using adapted questions from the Centers for Disease Control and Prevention  
3 (CDC) questionnaire<sup>31</sup> conducted in April/ May 2015 in Muscat (Urban communities).  
4  
5 Reporting of this study follows the guidelines for strengthening the reporting of  
6  
7 observational studies in epidemiology (STROBE).<sup>32</sup>  
8  
9

10 All patients with T2D attending their routine diabetes clinics in 17 randomly selected  
11 primary health care centres in Muscat were approached to take part in the study.  
12  
13 Inclusion criteria were age >18 years and being followed up in a diabetes clinic for > 2  
14 years and ability to provide informed consent. For illiterate participants, informed  
15 consents were taken from their spouse, son, daughter or other close family member.  
16  
17 Participants with type 1 diabetes, newly diagnosed (<6 months) or who had difficulty in  
18 performing any physical activity, including history of myocardial infarction of <6  
19 months and multiple organ failure, were excluded.  
20  
21  
22  
23  
24  
25  
26  
27  
28

### 29 **Data sources/ measurement**

30  
31  
32 In addition to recording physiological data (BMI, medication, duration of diabetes,  
33 blood pressure, lipid profile, and comorbidities coinciding with diabetes) from the  
34 electronic health system, a multi-section questionnaire with a range of answers in closed  
35 format was administered by a trained interviewer. The following information was  
36 collected:  
37  
38  
39  
40  
41  
42

43  
44 *Socio-demographic data:* included gender, age, marital status, education, household  
45 income, and work status  
46  
47

48  
49 *Perceptions on stage of change in physical activity:* Based on the trans-theoretical  
50 theory of behaviour change,<sup>33</sup> subjects were asked to identify their perceived stage of  
51 change in physical activity. Participants were to select “Maintenance stage” if they were  
52 participating in moderate physical activity five or more times per week or in vigorous  
53 activity three to five times per week longer than six consecutive months or select  
54  
55  
56  
57  
58  
59  
60



1 “Action stage” if less than six months. “Preparation stage” was selected by subjects who  
2 were thinking about starting exercise such as walking in the near future, or doing  
3 vigorous activity less than three times per week, or moderate activity less than five  
4 times per week. Contemplation stage “getting ready” was selected by subjects who were  
5 thinking about starting exercise or walk in the next six months. Subjects who were not  
6 thinking about starting any PA in the near future selected pre-contemplation stage “not  
7 ready”.

8  
9  
10  
11  
12  
13  
14  
15  
16  
17  
18 *CDC questionnaire on barriers to leisure PA:*

19  
20 An English to Arabic translated CDC questionnaire “Barriers to Being Active” was  
21 used in a study in Saudi Arabia<sup>14</sup> with 21 questions on seven barriers (lack of time, lack  
22 of social support, lack of energy, lack of willpower, fear of injury, lack of skill and lack  
23 of resources). Permission to use the questionnaire was obtained from the lead author on  
24 November 24, 2014  
25 (<https://www.ncbi.nlm.nih.gov/pmc/articles/PMC2813614/figure/F0001/>). The  
26 questionnaire was developed further to include two additional barrier categories, namely  
27 religion and environment. These additional questions were included due to other similar  
28 studies in neighbour countries with similar socio-economical characteristics.<sup>28 29</sup>  
29 Potential religious barriers considered questions on religious beliefs restricting PA,  
30 accepted clothing for PA and religious perceptions on PA.<sup>14 25 26</sup> Potential  
31 environmental barriers included questions on extreme weather conditions, physical  
32 activity in summer time and availability of appropriate environment for PA.<sup>16 25</sup> A set of  
33 three related questions (total of 27 questions) presented in random order within the  
34 questionnaire represented one barrier category.

35  
36  
37  
38  
39  
40  
41  
42  
43  
44  
45  
46  
47  
48  
49  
50  
51  
52  
53  
54 A scoring system<sup>31</sup> was used to indicate how likely each statement/question was  
55 considered to be a barrier (very likely=3, somewhat likely=2, somewhat unlikely=1,  
56 very unlikely=0). Scores of the three theme-related questions were added up to provide  
57  
58  
59  
60

1 a total for each category of barriers. Possible scores for each barrier category ranged  
2 from 0-9. A score of  $\geq 5$  was considered as an important significant barrier.<sup>31</sup> The  
3 questionnaire was pre-tested in Muscat by distributing to 25 randomly selected adult  
4 patients with T2D from a population outside the sampled health centres. Amendments  
5 were made to ensure translation to Arabic was appropriate and PA related definitions  
6 were met. A copy of the used questionnaire can be found in online supplementary  
7 material1.  
8  
9

### 10 **Study size**

11 The sample size was calculated using an estimated 15% prevalence of adequate PA in  
12 patients with diabetes, as reported in the 2008 Oman World Health Survey (OWHS).<sup>34</sup>  
13 For 95% confidence limits, a response rate of 80%, and a precision of 20%, and  
14 smallest expected frequency of 15%, the calculated sample size was 305 participants  
15 across primary health centres in Muscat region, the capital of Oman.  
16  
17

### 18 **Training**

19 A multidisciplinary team of two nurses, one senior dietician, one medical orderly and  
20 two doctors were recruited for data collection. A one day training on administration of  
21 the questionnaire was delivered by the national focal point on PA in Oman Ministry of  
22 Health. Data entry, cross-checking and cleaning was done through Epi Info™ 7 by an  
23 independent personnel. Entered data was transferred to SPSS v21 for analysis and  
24 subsequent results.  
25  
26  
27  
28  
29  
30  
31

### 32 **Statistical methods**

33 Descriptive statistics were expressed as percentages and mean (SD), median (quartiles)  
34 to describe the study sample characteristics. Sum of scores from the three related  
35 questions per category (range from 0-9) were expressed as median, the 25<sup>th</sup>, and 75<sup>th</sup>  
36  
37  
38  
39  
40  
41  
42  
43  
44  
45  
46  
47  
48  
49  
50  
51  
52  
53  
54  
55  
56  
57  
58  
59  
60

1  
2  
3  
4  
5  
6  
7  
8  
9  
10  
11  
12  
13  
14  
15  
16  
17  
18  
19  
20  
21  
22  
23  
24  
25  
26  
27  
28  
29  
30  
31  
32  
33  
34  
35  
36  
37  
38  
39  
40  
41  
42  
43  
44  
45  
46  
47  
48  
49  
50  
51  
52  
53  
54  
55  
56  
57  
58  
59  
60

quartiles. Data were dichotomised to scores  $<5$  and  $\geq 5$  to determine the highly reported barriers.<sup>31</sup> Chi-square analysis was carried out to identify potential factors associated with high barrier scores ( $\geq 5$ ) across the independent sociodemographic factors including gender (male vs female); age ( $\leq 57$  vs  $>57$ ); marital status (currently unmarried vs married); education (those unable to read or write (“uneducated”) vs. those having attended primary school or beyond (“educated”)); household income ( $<500$  vs  $\geq 500$  Omani rials - ‘OR’); and employment (unemployed (including those retired) vs employed). Self-reported stage of change in PA was expressed as one of two categories: inactive if reporting “pre-contemplation” or “contemplation” and potentially active if reporting being at “preparation”, “action”, or “maintenance” stages of PA. Corrected P-values (Yate’s continuity) were reported for high barrier scores against the studied independent variables.

## RESULTS

### Socio-demographic

Out of 312 patients approached, 305 (98%) completed the questionnaire. Slightly more females were represented in this sample (57.4%, 175/305) than males. Mean (SD) age was 57(10.8) years with more than two-thirds being married (78.8%) and just about half unable to read or write (48.9%). More than a third of the study population (39.3%) reported household income of  $<500$  OR (less than national average)<sup>35</sup> and the majority (77%) reported unemployment (including retirement). More males than females were educated (70% vs 37%) and employed (45% vs 7%) (**Table 1**).

### Physiological status

Median (LQ, UQ) duration of diabetes in this population was 6.0 (4.0-10.0) years. The majority of the participants had hypertension (n=217, 71%) or/and hyperlipidaemia (n=189, 62%) coinciding with their diabetes. All of them were using anti-hypertensive

or/and lipid lowering medications as appropriate. More than three-quarters of those taking anti-hypertensives (78%) and two-thirds of those using lipid lowering drugs (66%) had blood pressure readings and fasting serum cholesterol within target levels (BP<140/80 mmHg and fasting serum cholesterol of <5mmol/l).<sup>36</sup> Fifteen percent (n=45) were controlling their diabetes by diet alone versus 85% (n=260) on oral anti-hypoglycaemic medications, in which 25% (n=75) were additionally on insulin. Mean (SD) BMI was 31.0 (6.0) kg/m<sup>2</sup> where 89% (n=271) had BMI >25kg/m<sup>2</sup> in which 50% (n=153) were obese (BMI>30 kg/m<sup>2</sup>) and 39% (n=118) were overweight (BMI>25-29.99 kg/m<sup>2</sup>). Glycated haemoglobin HbA1c was >7% in more than half of the population (58%) indicating poor diabetes control **Table 1**.

#### Self-reported stages of PA

Only 17% (n=52) of participants considered themselves actively participating in regular moderate or vigorous PA (22% of males vs 13% of females). Of the remainder, the majority reported being “not ready” (n=112, 37%), “getting ready” (n=95, 31%) or in “preparation” (n=46, 15%) (**Table 1**).

**Table 1: Selected participants characteristics**

| Population characteristics | Male                                                                | Female                                                              | Total population                                                    |
|----------------------------|---------------------------------------------------------------------|---------------------------------------------------------------------|---------------------------------------------------------------------|
|                            | 130(43%)                                                            | 175(57%)                                                            | n=305(100%)                                                         |
| Age (years)                | (25 <sup>th</sup> ,50 <sup>th</sup> ,75 <sup>th</sup> )<br>51,60,66 | (25 <sup>th</sup> ,50 <sup>th</sup> ,75 <sup>th</sup> )<br>49,56,63 | (25 <sup>th</sup> ,50 <sup>th</sup> ,75 <sup>th</sup> )<br>50,57,65 |
|                            | ≤57<br>56(43)                                                       | 99(57)                                                              | 155(51)                                                             |
|                            | >57<br>74(57)                                                       | 79(43)                                                              | 150(49)                                                             |
| Marital status             |                                                                     |                                                                     |                                                                     |
| Currently unmarried        | 10(8)                                                               | 55(31)                                                              | 65(21)                                                              |
| Currently married          | 130(92)                                                             | 120(69)                                                             | 240(79)                                                             |
| Education                  |                                                                     |                                                                     |                                                                     |
| Not educated               | 39(30)                                                              | 110(63)                                                             | 149(49)                                                             |
| Educated                   | 91(70)                                                              | 65(37)                                                              | 156(51)                                                             |
| Income                     |                                                                     |                                                                     |                                                                     |

|                                           |                                          |                                                                             |                                                                               |                                                                               |
|-------------------------------------------|------------------------------------------|-----------------------------------------------------------------------------|-------------------------------------------------------------------------------|-------------------------------------------------------------------------------|
|                                           | <500 OR                                  | 51(39)                                                                      | 69(40)                                                                        | 120(39)                                                                       |
|                                           | ≥500 OR                                  | 79(61)                                                                      | 106(60)                                                                       | 185(61)                                                                       |
| <b>Employment</b>                         |                                          |                                                                             |                                                                               |                                                                               |
|                                           | Not employed                             | 71(55)                                                                      | 163(93)                                                                       | 234(77)                                                                       |
|                                           | Employed                                 | 59(45)                                                                      | 12(7)                                                                         | 71(23)                                                                        |
| <b>Physiological</b>                      |                                          |                                                                             |                                                                               |                                                                               |
|                                           | Duration of diabetes (years)             | (25 <sup>th</sup> ,50 <sup>th</sup> , 75 <sup>th</sup> )<br>4,6,10          | (25 <sup>th</sup> ,50 <sup>th</sup> , 75 <sup>th</sup> )<br>4,6,10            | (25 <sup>th</sup> ,50 <sup>th</sup> , 75 <sup>th</sup> )<br>4,6,10            |
| <b>Self-reported comorbidities*</b>       |                                          |                                                                             |                                                                               |                                                                               |
|                                           | Yes                                      | 116(89.2)                                                                   | 161(92)                                                                       | 277(91)                                                                       |
|                                           | No                                       | 14(10.8)                                                                    | 14(8)                                                                         | 28 (9)                                                                        |
| <b>Current medication</b>                 |                                          |                                                                             |                                                                               |                                                                               |
|                                           | Anti-HTN                                 | 93(72)                                                                      | 124(71)                                                                       | 217(71)                                                                       |
|                                           | Lipid lowering drugs                     | 80(62)                                                                      | 109(62)                                                                       | 189(62)                                                                       |
|                                           | Oral-hypoglycaemic drugs                 | 114(88)                                                                     | 146(83)                                                                       | 260(85)                                                                       |
|                                           | Oral-hypoglycaemic drugs with<br>Insulin | 32(25)                                                                      | 43(25)                                                                        | 75(25)                                                                        |
|                                           | Diet control                             | 16(12)                                                                      | 29(17)                                                                        | 45(15)                                                                        |
| <b>BP<br/>(systolic/diastolic) mmHg**</b> |                                          |                                                                             |                                                                               |                                                                               |
|                                           | Within target (<140/<80)                 | 103(79)                                                                     | 134(77)                                                                       | 237(78)                                                                       |
|                                           | High (≥140/≥80)                          | 27(21)                                                                      | 41(23)                                                                        | 68(22)                                                                        |
| <b>Fasting lipid profile (mmol/l)**</b>   |                                          |                                                                             |                                                                               |                                                                               |
|                                           | Cholesterol within target (< 5.0)        | 86(66)                                                                      | 115(66)                                                                       | 201(66)                                                                       |
|                                           | Cholesterol high (≥5.0)                  | 44(34)                                                                      | 60(34)                                                                        | 104(34)                                                                       |
| <b>BMI(kg/m2)**</b>                       |                                          |                                                                             |                                                                               |                                                                               |
|                                           |                                          | (25 <sup>th</sup> ,50 <sup>th</sup> , 75 <sup>th</sup> )<br>25.7,28.9,33.3  | (25 <sup>th</sup> ,50 <sup>th</sup> , 75 <sup>th</sup> )<br>27.5,31.6,35.3    | (25 <sup>th</sup> ,50 <sup>th</sup> , 75 <sup>th</sup> )<br>26.8,30.1,34.6    |
|                                           | Healthy weight range (18.5-24.99)        | 23(18)                                                                      | 11(6)                                                                         | 34(11)                                                                        |
|                                           | Overweight (>25-29.99)                   | 58(45)                                                                      | 60(34)                                                                        | 118(39)                                                                       |
|                                           | Obese (>30)                              | 49(59)                                                                      | 104(59)                                                                       | 153(50)                                                                       |
| <b>HbA1c(%)**</b>                         |                                          |                                                                             |                                                                               |                                                                               |
|                                           |                                          | (25 <sup>th</sup> ,50 <sup>th</sup> , 75 <sup>th</sup> ):<br>7.4(6.7,7.4,9) | (25 <sup>th</sup> ,50 <sup>th</sup> , 75 <sup>th</sup> ):<br>7.7(6.3,7.7,8.5) | (25 <sup>th</sup> ,50 <sup>th</sup> , 75 <sup>th</sup> ):<br>7.6(6.6,7.6,8.7) |
|                                           | Normal ≤7%                               | 58(45)                                                                      | 69(40)                                                                        | 127(42)                                                                       |
|                                           | High >7%                                 | 72(55)                                                                      | 106(61)                                                                       | 178(58)                                                                       |
| <b>Self-reported stages of PA</b>         |                                          |                                                                             |                                                                               |                                                                               |
|                                           | Not ready (Pre-contemplation)            | 40(31)                                                                      | 72(41)                                                                        | 112(37)                                                                       |
|                                           | Getting ready(contemplation)             | 41(32)                                                                      | 54(31)                                                                        | 95(31)                                                                        |
|                                           | Preparation                              | 20(15)                                                                      | 26(15)                                                                        | 46(15)                                                                        |
|                                           | Action                                   | 10(8)                                                                       | 4(2)                                                                          | 14(5)                                                                         |
|                                           | Maintenance                              | 19(14)                                                                      | 19(11)                                                                        | 38(12)                                                                        |

\*Reported hypertension, hyperlipidaemia, thyroid dysfunction or any other chronic condition coinciding with diabetes.

\*\* Oman diabetes mellitus management guidelines (2015)

### CDC questionnaire on barriers to leisure PA

The majority of the population, 96.4% (n=294), reported at least one barrier to performing leisure physical activity (97.7% females: 95.4% males). Population distributions were not normal across all reported barrier categories. Median sum scores

1  
2  
3  
4  
5  
6  
7  
8  
9  
10  
11  
12  
13  
14  
15  
16  
17  
18  
19  
20  
21  
22  
23  
24  
25  
26  
27  
28  
29  
30  
31  
32  
33  
34  
35  
36  
37  
38  
39  
40  
41  
42  
43  
44  
45  
46  
47  
48  
49  
50  
51  
52  
53  
54  
55  
56  
57  
58  
59  
60

were all  $<5$  as illustrated in (**Error! Reference source not found.**). Except for reporting lack of will and lack of resources, 75% of sum scores of other reported barriers were  $\leq 5$ .

---

INSERT FIGURE 1 ABOUT HERE

---

Categorizing barrier scores to  $<5$  and  $\geq 5$  (significant barrier) highlighted that ‘lack of willpower’ (n=139, 45.6%), ‘lack of resources’ (n=93, 30.5%) and ‘lack of social support’ (n=89, 29.2%) were the most frequently reported ‘significant barriers’ to physical activity. Barriers found to be significant in both males and females were lack of willpower (41.5% m: 48.6% f) and lack of resources (32.3% m: 29.1% f). In addition, lack of time in males (26.9%) and lack of social support in females (35.4%) were also significant (Figure 2).

---

INSERT FIGURE 2 ABOUT HERE

---

Associations between proportions indicating a high barrier score ( $\geq 5$ ) with sociodemographic factors and self-reported stages of PA differed across the nine studied barrier categories: “Lack of time” was reported as a significant barrier more frequently by males ( $P=0.02$ ), younger adults ( $P=0.002$ ) and those who were married ( $P=0.002$ ), employed ( $P=<0.001$ ) or educated ( $P=<0.001$ ). “Lack of social support” on the other hand, was reported as a significant barrier more frequently by females ( $P=0.008$ ) and “Lack of energy” by employed ( $P=0.003$ ), or educated ( $P=0.042$ ) adults. However, “Lack of willpower” was reported as a significant barrier more frequently by individuals with lower income ( $P=0.021$ ), or individuals at inactive stages of PA ( $P=0.012$ ). Moreover, “Fear of injury” was reported as a significant barrier more frequently by

1  
2 older adults ( $P=0.008$ ), unemployed ( $P=0.007$ ), uneducated ( $P=<0.001$ ), or individuals  
3  
4 reporting in-active stages of PA ( $P=<0.001$ ). Furthermore, “Lack of skills” was reported  
5  
6 as a significant barrier more frequently by females ( $P=0.003$ ), younger adults  
7  
8 ( $P=0.025$ ), unemployed ( $P=0.004$ ) or uneducated ( $P=0.01$ ). Additionally, “Lack of  
9  
10 resources” was reported as a significant barrier more frequently by married adults  
11  
12 ( $P=0.026$ ) or with lower income ( $P=0.005$ ). It is notable that the religious and  
13  
14 environmental barriers had no significant associations with any of the studied factors  
15  
16 (Table 2).  
17  
18  
19  
20  
21  
22  
23  
24  
25  
26  
27  
28  
29  
30  
31  
32  
33  
34  
35  
36  
37  
38  
39  
40  
41  
42  
43  
44  
45  
46  
47  
48  
49  
50  
51  
52  
53  
54  
55  
56  
57  
58  
59  
60

**Table 2: Factors influencing high barrier scores to leisure physical activity in adult population with type 2 diabetes**

1  
2  
3  
4  
5  
6  
7  
8  
9  
10  
11  
12  
13  
14  
15  
16  
17  
18  
19  
20  
21  
22  
23  
24  
25  
26  
27  
28  
29  
30  
31  
32  
33  
34  
35  
36  
37  
38  
39  
40  
41  
42  
43  
44  
45  
46  
47  
48  
49

|                                 | Lack of time  |              | Lack of social support |              | Lack of energy |              | Lack of willpower |               | Fear of injury |              | Lack of skills |              | Lack of resources |              | Religious barriers |             | Environmental barriers |              |
|---------------------------------|---------------|--------------|------------------------|--------------|----------------|--------------|-------------------|---------------|----------------|--------------|----------------|--------------|-------------------|--------------|--------------------|-------------|------------------------|--------------|
| N (%)                           | <5            | >=5          | <5                     | >=5          | <5             | >=5          | <5                | >=5           | <5             | >=5          | <5             | >=5          | <5                | >=5          | <5                 | >=5         | <5                     | >=5          |
|                                 | 243<br>(79.7) | 62<br>(20.3) | 216<br>(70.8)          | 89<br>(29.2) | 249<br>(81.6)  | 56<br>(18.4) | 166<br>(54.4)     | 139<br>(45.6) | 227<br>(74.4)  | 78<br>(25.6) | 239<br>(78.4)  | 66<br>(21.6) | 212<br>(69.5)     | 93<br>(30.5) | 292<br>(95.7)      | 13<br>(4.3) | 269<br>(88.2)          | 36<br>(11.8) |
| Gender:                         |               |              |                        |              |                |              |                   |               |                |              |                |              |                   |              |                    |             |                        |              |
| Male<br>130(42.6)               | 95<br>(73.1)  | 35<br>(26.9) | 103<br>(79.2)          | 27<br>(20.8) | 102<br>(78.5)  | 28<br>(21.5) | 76<br>(58.5)      | 54<br>(41.5)  | 98<br>(75.4)   | 32<br>(24.6) | 113<br>(86.9)  | 17<br>(13.1) | 88<br>(67.7)      | 42<br>(32.3) | 125<br>(96.2)      | 5<br>(3.8)  | 117<br>(90)            | 13<br>(10)   |
| Female<br>175(57.4)             | 148<br>(84.6) | 27<br>(15.4) | 113<br>(64.6)          | 62<br>(35.4) | 147<br>(84)    | 28<br>(16)   | 90<br>(51.4)      | 85<br>(48.6)  | 129<br>(73.7)  | 46<br>(26.3) | 126<br>(72)    | 49<br>(28)   | 124<br>(70.9)     | 51<br>(29.1) | 167<br>(95.4)      | 8<br>(4.6)  | 152<br>(86.9)          | 23<br>(13.1) |
| Corrected $\chi^2$<br>(P-value) | 5.4(0.020)*   |              | 7.1(0.008)*            |              | 1.2(0.278)     |              | 1.2(0.270)        |               | 0.04(0.843)    |              | 8.9(0.003)*    |              | 0.2(0.640)        |              | 0.001(0.981)       |             | 0.4(0.508)             |              |
| Age:                            |               |              |                        |              |                |              |                   |               |                |              |                |              |                   |              |                    |             |                        |              |
| <=57<br>155(50.8)               | 112<br>(72.3) | 43<br>(27.7) | 114<br>(73.5)          | 41<br>(26.5) | 122<br>(78.7)  | 33<br>(21.3) | 84<br>(54.2)      | 71<br>(45.8)  | 126<br>(81.3)  | 29<br>(18.7) | 130<br>(83.9)  | 25<br>(16.1) | 103<br>(66.5)     | 52<br>(33.5) | 148<br>(95.5)      | 7<br>(4.5)  | 136<br>(87.7)          | 19<br>(12.3) |
| >57<br>150(49.2)                | 131<br>(87.3) | 19<br>(12.7) | 102<br>(68)            | 48<br>(32)   | 127<br>(84.7)  | 23<br>(15.3) | 82<br>(54.7)      | 68<br>(45.3)  | 101<br>(67.3)  | 49<br>(32.7) | 109<br>(72.7)  | 41<br>(27.3) | 109<br>(72.7)     | 41<br>(27.3) | 144<br>(96.0)      | 6<br>(4.0)  | 133<br>(88.7)          | 17<br>(11.3) |
| Corrected $\chi^2$<br>(P-value) | 9.7(0.002)*   |              | 0.9(0.347)             |              | 1.4(0.232)     |              | 0.0(1.0)          |               | 7.1(0.008)*    |              | 5.0(0.025)*    |              | 1.1(0.292)        |              | 0.00(1.0)          |             | 0.0(0.942)             |              |
| Marital status:                 |               |              |                        |              |                |              |                   |               |                |              |                |              |                   |              |                    |             |                        |              |
| Unmarried<br>65(21.3)           | 58<br>(89.2)  | 7<br>(10.8)  | 42<br>(64.6)           | 23<br>(35.4) | 54<br>(83.1)   | 11<br>(16.9) | 37<br>(56.9)      | 28<br>(43.1)  | 45<br>(69.2)   | 20<br>(30.8) | 49<br>(75.4)   | 16<br>(24.6) | 53<br>(81.5)      | 12<br>(18.5) | 60<br>(92.3)       | 5<br>(7.7)  | 56<br>(86.2)           | 9<br>(13.8)  |
| Married<br>240(78.7)            | 185<br>(77.1) | 55<br>(22.9) | 174<br>(72.5)          | 66<br>(27.5) | 195<br>(81.3)  | 45<br>(18.8) | 129<br>(53.8)     | 111<br>(46.3) | 182<br>(75.8)  | 58<br>(24.2) | 190<br>(79.2)  | 50<br>(20.8) | 159<br>(66.3)     | 81<br>(33.8) | 232<br>(96.7)      | 8<br>(3.3)  | 213<br>(88.8)          | 27<br>(11.3) |
| Corrected $\chi^2$<br>(P-value) | 3.9(0.047)*   |              | 1.2(0.277)             |              | 0.0(0.875)     |              | 0.1(0.753)        |               | 0.9(0.356)     |              | 0.2(0.626)     |              | 4.9(0.026)*       |              | 1.4(0.231)         |             | 0.1(0.720)             |              |
| Employment:                     |               |              |                        |              |                |              |                   |               |                |              |                |              |                   |              |                    |             |                        |              |
| Un employed<br>234(76.7)        | 205<br>(87.6) | 29<br>(12.4) | 160<br>(68.4)          | 74<br>(31.6) | 200<br>(85.5)  | 34<br>(14.5) | 124<br>(53)       | 110<br>(47)   | 165<br>(70.5)  | 69<br>(29.5) | 174<br>(74.4)  | 60<br>(25.6) | 160<br>(68.4)     | 74<br>(31.6) | 223<br>(95.3)      | 11<br>(4.7) | 207<br>(88.5)          | 27<br>(11.5) |
| Employed<br>37                  | 38            | 33           | 56                     | 15           | 49             | 22           | 42                | 29            | 62             | 9            | 65             | 6            | 52                | 19           | 69                 | 2           | 62                     | 9            |



1  
2  
3

|    |                             |               |        |            |        |             |        |             |        |               |        |             |        |             |        |            |       |            |        |
|----|-----------------------------|---------------|--------|------------|--------|-------------|--------|-------------|--------|---------------|--------|-------------|--------|-------------|--------|------------|-------|------------|--------|
| 4  | 71(23.3)                    | (53.5)        | (46.5) | (78.9)     | (21.1) | (69)        | (31)   | (59.2)      | (40.8) | (87.3)        | (12.7) | (91.5)      | (8.5)  | (73.2)      | (26.8) | (97.2)     | (2.8) | (87.3)     | (12.7) |
| 5  | Corrected $\chi^2$          | 37.0(<0.001)* |        | 2.4(0.120) |        | 8.8(0.003)* |        | 0.6(0.437)  |        | 7.2(0.007)*   |        | 8.5(0.004)* |        | 0.4(0.527)  |        | 0.1(0.740) |       | 0.0(0.960) |        |
| 6  | (P-value)                   |               |        |            |        |             |        |             |        |               |        |             |        |             |        |            |       |            |        |
| 7  | Education:                  |               |        |            |        |             |        |             |        |               |        |             |        |             |        |            |       |            |        |
| 8  | Uneducated                  | 132           | 17     | 99         | 50     | 129         | 20     | 81          | 68     | 96            | 53     | 107         | 42     | 105         | 44     | 140        | 9     | 133        | 16     |
| 9  | 149(48.9)                   | (88.6)        | (11.4) | (66.4)     | (33.6) | (86.6)      | (13.4) | (54.4)      | (45.6) | (64.4)        | (35.6) | (71.8)      | (28.2) | (70.5)      | (29.5) | (94.0)     | (6.0) | (89.3)     | (10.7) |
| 10 | Educated-                   | 111           | 45     | 117        | 39     | 120         | 36     | 85          | 71     | 131           | 25     | 132         | 24     | 107         | 49     | 152        | 4     | 136        | 20     |
| 11 | 156(51.1)                   | (71.2)        | (28.8) | (75)       | (25)   | (76.9)      | (23.1) | (54.5)      | (45.5) | (84)          | (16)   | (84.6)      | (15.4) | (68.6)      | (31.4) | (97.4)     | (2.6) | (87.2)     | (12.8) |
| 12 | Corrected $\chi^2$          | 13.2(<0.001)* |        | 2.3(0.129) |        | 4.1(0.042)* |        | 0.0(1.0)    |        | 14.2(<0.001)* |        | 6.6(0.010)* |        | 0.1(0.816)  |        | 1.5(0.162) |       | 0.1(0.700) |        |
| 13 | (P-value)                   |               |        |            |        |             |        |             |        |               |        |             |        |             |        |            |       |            |        |
| 14 | Income:                     |               |        |            |        |             |        |             |        |               |        |             |        |             |        |            |       |            |        |
| 15 | <500                        | 100           | 20     | 88         | 32     | 94          | 26     | 55          | 65     | 95            | 25     | 92          | 28     | 72          | 48     | 113        | 7     | 110        | 10     |
| 16 | 120(39.3)                   | (83.3)        | (16.7) | (73.3)     | (26.7) | (78.3)      | (21.7) | (45.8)      | (54.2) | (79.2)        | (20.8) | (76.7)      | (23.3) | (60)        | (40)   | (94.2)     | (5.8) | (91.7)     | (8.3)  |
| 17 | >=500                       | 143           | 42     | 128        | 57     | 155         | 30     | 111         | 74     | 132           | 53     | 147         | 38     | 140         | 45     | 179        | 6     | 159        | 26     |
| 18 | 185(60.7)                   | (77.3)        | (22.7) | (69.2)     | (30.8) | (83.8)      | (16.2) | (60)        | (40)   | (71.4)        | (28.6) | (79.5)      | (20.5) | (75.7)      | (24.3) | (96.8)     | (3.2) | (85.9)     | (14.1) |
| 19 | Corrected $\chi^2$          | 1.3(0.257)    |        | 0.4(0.516) |        | 1.1(0.294)  |        | 5.3(0.021)* |        | 1.9(0.163)    |        | 0.2(0.663)  |        | 7.7(0.005)* |        | 0.6(0.422) |       | 1.8(0.183) |        |
| 20 | (P-value)                   |               |        |            |        |             |        |             |        |               |        |             |        |             |        |            |       |            |        |
| 21 | Self-reported stages of PA: |               |        |            |        |             |        |             |        |               |        |             |        |             |        |            |       |            |        |
| 22 | Not active                  | 169           | 38     | 148        | 59     | 170         | 37     | 102         | 105    | 141           | 66     | 157         | 50     | 146         | 61     | 198        | 9     | 179        | 28     |
| 23 | 207(67.9)                   | (81.6)        | (18.4) | (71.5)     | (28.5) | (82.1)      | (17.9) | (49.3)      | (50.7) | (68.1)        | (31.9) | (75.8)      | (24.2) | (70.5)      | (29.5) | (95.7)     | (4.3) | (86.5)     | (13.5) |
| 24 | Active                      | 74            | 24     | 68         | 30     | 79          | 19     | 64          | 34     | 86            | 12     | 82          | 16     | 66          | 32     | 94         | 4     | 90         | 8      |
| 25 | 98(32.1)                    | (75.5)        | (24.5) | (69.4)     | (30.6) | (80.6)      | (19.4) | (65.3)      | (34.7) | (87.8)        | (12.2) | (83.7)      | (16.3) | (67.3)      | (32.7) | (95.9)     | (4.1) | (91.8)     | (8.2)  |
| 26 | Corrected $\chi^2$          | 1.2(0.276)    |        | 0.1(0.808) |        | 0.0(0.873)  |        | 6.2(0.012)* |        | 12.5(<0.001)* |        | 2.0(0.161)  |        | 0.2(0.667)  |        | 0.00(1.0)  |       | 1.4(0.244) |        |
| 27 | (P-value)                   |               |        |            |        |             |        |             |        |               |        |             |        |             |        |            |       |            |        |

\* Significant at P&lt;0.05

29  
30  
31  
32  
33  
34  
35  
36  
37  
38  
39  
40  
41  
42  
43  
44  
45  
46  
47  
48  
49

## DISCUSSION

Despite evidence on the effectiveness of meeting PA levels in the management of T2D, and associated cardiovascular risk factors, PA is poorly addressed in routine diabetes care.<sup>37</sup> Low PA levels in populations with T2D are consistently reported in western countries namely USA<sup>38</sup> as well as Arabic speaking countries namely Oman, Saudi Arabia and Lebanon.<sup>2 39 40</sup> Addressing perceived barriers to performing recommended PA levels in this population is crucial for planning effective PA promoting interventions.

Within a series of formative studies to inform a culturally congruent PA intervention in diabetes care,<sup>41</sup> this study has looked at perceived barriers to performing leisure time physical activity in an adult population with T2D attending primary care using an adapted CDC questionnaire translated to Arabic language.<sup>14</sup>

The current findings relating to willpower, resources and social support were also reported as the top three barriers to PA in the Saudi population attending primary care by AlQuaiz (2009). In the west, USA in particular, the strongest reported barriers to physical activity among adults with T2D were pain (41%), followed by lack of willpower (27%), and poor health (21%).<sup>42</sup>

Lack of willpower was significantly reported by individuals with low income. Since this study focused on leisure PA, individuals with low income may have less access to PA facilities and discretionary time to perform PA. However, despite evidence on a positive association between socioeconomic status and physical activity in countries of low and middle income, this association is inconsistent or inverse from high-income countries.<sup>43</sup>

<sup>44</sup> More evidence is required from high income and Arabic speaking countries namely Oman to validate the impact of economic status on leisure PA for individuals with T2D. Additionally, reporting lack of willpower in this population was significant in

1 individuals who reported being at inactive stages of physical activity (pre-contemplation  
2 or contemplation stages of physical activity). Progressive stages of behavioural change  
3 according to the trans-theoretical model were direct correlates to PA in a review article  
4 by Trost (2002)<sup>45</sup> and direct determinants in another by Van Stralen (2009) .<sup>46</sup> This  
5 finding supports the need for programs to help raise self-willpower/determination  
6 through stepped process of behaviour change from inactive (pre-contemplation) to  
7 active stages of PA (action and maintenance).<sup>47</sup> Five behaviour change techniques  
8 namely: prompt focus on past success, barrier identification/ problem-solving, use of  
9 follow-up prompts, providing information on where and when to perform the behaviour  
10 and prompt review of behavioural goals of PA, have been significantly associated with  
11 increased PA behaviour in T2D and improving HbA1c in western countries.<sup>48</sup> PA  
12 interventions underpinned by behaviour changes techniques should be considered in  
13 Arabic speaking populations with T2D namely Oman.

14  
15  
16  
17  
18  
19  
20  
21  
22  
23  
24  
25  
26  
27  
28  
29  
30  
31 Limited resources including high cost and limited facilities for PA were similarly  
32 reported as significant barriers to PA across different cultures.<sup>20 22</sup> In this study, it was  
33 reported as significant by individuals who were married and those with low income.  
34 Married individuals could have more financial commitments to their families especially  
35 in the GCC countries where extended families are common.<sup>49</sup> This may alter an  
36 individual's priorities for house-hold income expenditure. Low income was similarly  
37 reported in the Saudi study as a significant factor through the reporting of lack of  
38 resources being a barrier due to the perceived high cost of utilising PA facilities in order  
39 to be physically active, or purchasing PA equipment.<sup>14</sup> This may reflect a narrow view  
40 on what constitutes PA and a misconception that expensive equipment is required.  
41 Hence, irrespective of culture, interventions promoting cost neutral PA such as walking  
42 in populations would be highly desirable to overcome this barrier.<sup>41 50</sup>

1  
2  
3  
4  
5  
6  
7  
8  
9  
10  
11  
12  
13  
14  
15  
16  
17  
18  
19  
20  
21  
22  
23  
24  
25  
26  
27  
28  
29  
30  
31  
32  
33  
34  
35  
36  
37  
38  
39  
40  
41  
42  
43  
44  
45  
46  
47  
48  
49  
50  
51  
52  
53  
54  
55  
56  
57  
58  
59  
60

Lack of social support was frequently reported by females in this study.<sup>22 51</sup> Meeting cultural norms and social expectations related to safety, security and conservative dress mainly for females were reported as barriers to PA in South Asian (Pakistani and Indian) British populations<sup>18 21</sup> and populations in Arabic counties such as Qatar.<sup>52</sup> Evaluation of interventions to provide the necessary social support and networks to PA specifically for women with T2D, particularly in the GCC, and including group-based activities and buddying,<sup>53-55</sup> are required.

Other reported barriers such as fear of injury and lack of skills varied across subgroups in particular, older, unemployed, and uneducated individuals. Older individuals with T2D are more vulnerable to have poor vision and osteoarthritic changes that may cause fall and injuries. Moreover the negative influence of pain to PA in older population with T2D was reported in western countries,<sup>42</sup> and hence potential barriers to their participation. Programs to promote PA should be individualized for type, frequency and intensity of PA and incorporate safety measures to prevent PA induced pain and injuries in older individuals.<sup>56</sup> Lack of time on the other hand, has been a highly cited barrier to PA in the general population as well as populations with diabetes.<sup>15-18 21 22 42 57</sup> However, unlike the study by Alquaiz (2009), significant scores for lack of time in this study were higher in males compared to females<sup>14</sup> and also a lack of energy, which may be a reflection of the fact that more males than females were educated and employed. This in addition to family and social commitments may have jeopardized their time for PA especially if individuals were younger and married. This discussion highlights the importance of changing people's perceptions of PA and consideration of opportunities in other PA domains namely work, and travel that could enable individuals with less leisure time to increase overall PA and behaviour.

Factors which are independent of an individual's decision-making, such as environment and religion had no significant associations in the current study despite the hot weather

1 during data collection of this study in April/May. These null results, may be real or may  
2 be due to the validity/ wording of the questions and their interpretation. To address this  
3 gap in the literature, a qualitative exploration of possible environmental, including  
4 seasonal variations, and religious factors affecting PA performance may be warranted.  
5  
6 Additionally, results of this study cannot be generalised across all regions in Oman.  
7  
8 More information is required from rural Omani communities where perceptions on PA  
9 may be different. Other limitations of this study include the subjective nature of self-  
10 reports and validity of the questions linked to translation of the questionnaire to Arabic  
11 language. Future attempts to explore barriers to PA should equally include work and  
12 travel domains to cater diversities in both PA behaviour and sedentary lifestyle across  
13 subgroups of adults with T2D.  
14  
15  
16  
17  
18  
19  
20  
21  
22  
23  
24  
25

## 26 **CONCLUSION**

27  
28  
29  
30 This study identified lack of willpower low resources and low social support (especially  
31 in females) as the most common barriers to performing leisure PA. Physical activity  
32 counselling linked to behaviour change techniques that influence individuals' readiness  
33 to change should be considered for augmenting self-efficacy issues. The provision of  
34 options for PA resources and social support should also be integrated in intervention  
35 design. Due to the range of barriers reported in the current study, PA counselling should  
36 aim to increase individuals' understanding of what constitutes PA and be flexible and  
37 tailored to the specific needs of subgroups of adults with T2D.  
38  
39  
40  
41  
42  
43  
44  
45  
46  
47

## 48 **ETHICAL CONSIDERATION**

49  
50  
51  
52 Ethical approval was obtained from the Regional Research Committee in Muscat, Oman  
53  
54 Ministry of Health. All eligible participants provided informed consent prior to data  
55  
56  
57  
58  
59  
60

1 collection. For illiterate individuals, consents to participate in this study were provided  
2  
3  
4 by their accompanying support member (spouse, son or daughter).  
5  
6

## 7 **COMPETING INTERESTS**

8  
9  
10 The authors declare that they have no competing interests.  
11  
12

## 13 **FUNDING**

14  
15  
16 The Oman Ministry of Health funded this project as part of a PhD grant offered to the  
17  
18 corresponding author.  
19  
20

## 21 **AUTHERS' CONTRIBUTION**

22  
23  
24 TS is the principal investigator in charge of the project. SM, YA, EB, AC and ASA  
25  
26 have all been involved in designing the intervention and the evaluation. TS prepared the  
27  
28 initial draft of the manuscript and all other authors have contributed. All authors have  
29  
30 critically reviewed and approved the final version of the manuscript.  
31  
32  
33

## 34 **ACKNOWLEDGEMENTS**

35  
36  
37 We would like to thank Dr. Ahmed Al-qasmi, Director General of Directorate of  
38  
39 Planning and Dr. Fatma Al-ajmi, Director General of Health Services, Muscat in Oman  
40  
41 Ministry of Health for their support and constant supervision.  
42  
43  
44

45 **DATA SHARING STATEMENT** No additional data are available.  
46  
47

## 48 **REFERENCES**

- 49  
50  
51  
52 1. International Diabetes Federation.  
53 : Brussels, Belgium 2015 <http://www.diabetesatlas.org>  
54  
55  
56 2. Al Riyami A, Abd Elaty MA, Morsi M, et al. Oman World Health Survey: Part 1 - methodology,  
57 sociodemographic profile and epidemiology of non-communicable diseases in Oman.  
58 *Oman Medical Journal* 2012;27(5):425-43.  
59  
60

## 3. World Health Organization. Physical activity

WHO; 2014 [fact sheet]. Available from: <http://www.who.int/mediacentre/factsheets/fs385/en/> accessed 21st May 2014.

4. Badran M, Laher I. Type II Diabetes Mellitus in Arabic-Speaking Countries. *International Journal Of Endocrinology* 2012;2012:902873-73. doi: 10.1155/2012/902873

5. Oman Health Vision 2050. 2012.

6. American Diabetes Association. Exercise and type 2 diabetes: American College of Sports Medicine and the American Diabetes Association: Joint Position Statement. *Medicine and Science in Sports and Exercise* 2010;42(12):2282-303. doi: 10.1249/MSS.0b013e3181eeb61c

7. Di Loreto C, Fanelli C, Lucidi P, et al. Make your diabetic patients walk: long-term impact of different amounts of physical activity on type 2 diabetes. *Diabetes care* 2005;28(6):1295-302.

8. World Health Organization. WHO's Global Recommendations on PA for Health 2010 [Available from: [http://whqlibdoc.who.int/publications/2010/9789241599979\\_eng.pdf](http://whqlibdoc.who.int/publications/2010/9789241599979_eng.pdf).

9. Heath GW, Parra DC, Sarmiento OL, et al. Evidence-based intervention in physical activity: lessons from around the world. *Lancet* 2012;380(9838):272-81. doi: 10.1016/S0140-6736(12)60816-2

10. Morrato EH, Hill JO, Wyatt HR, et al. Physical activity in U.S. adults with diabetes and at risk for developing diabetes, 2003. *Diabetes care* 2007;30(2):203-09.

11. Colberg SR, Sigal RJ, Fernhall B, et al. Exercise and type 2 diabetes: The American College of Sports Medicine and the American Diabetes Association: Joint position statement. *Diabetes care* 2010;33(12):e147-e67. doi: 10.2337/dc10-9990

12. Arem H, Moore SC, Patel A, et al. Leisure time physical activity and mortality: a detailed pooled analysis of the dose-response relationship. *JAMA internal medicine* 2015;175(6):959-67. doi: 10.1001/jamainternmed.2015.0533 [published Online First: 2015/04/07]

13. Hallman DM, Mathiassen SE, Gupta N, et al. Differences between work and leisure in temporal patterns of objectively measured physical activity among blue-collar workers. *BMC Public Health* 2015;15(1):976. doi: 10.1186/s12889-015-2339-4

14. AlQuaiz et al. Barriers to a healthy lifestyle among patients attending primary care clinics at a university hospital in Riyadh. *Annals Of Saudi Medicine* 2009;29(1):30-35.

15. Egan AM, Mahmood WAW, Fenton R, et al. Barriers to exercise in obese patients with type 2 diabetes. *QJM: Monthly Journal Of The Association Of Physicians* 2013;106(7):635-38. doi: 10.1093/qjmed/hct075

16. Korhakangas EE, Alahuhta MA, Husman PM, et al. Motivators and barriers to exercise among adults with a high risk of type 2 diabetes--a qualitative study. *Scandinavian Journal Of Caring Sciences* 2011;25(1):62-69. doi: 10.1111/j.1471-6712.2010.00791.x

17. Hume C, Dunstan D, Salmon J, et al. Are barriers to physical activity similar for adults with and without abnormal glucose metabolism? *The Diabetes Educator* 2010;36(3):495-502. doi: 10.1177/0145721710368326

18. Korhakangas EE, Alahuhta MA, Laitinen JH. Barriers to regular exercise among adults at high risk or diagnosed with type 2 diabetes: a systematic review. *Health Promotion International* 2009;24(4):416-27. doi: 10.1093/heapro/dap031

19. Labrunée M, Antoine D, Vergès B, et al. Effects of a home-based rehabilitation program in obese type 2 diabetics. *Annals Of Physical And Rehabilitation Medicine* 2012;55(6):415-29. doi: 10.1016/j.rehab.2012.06.001

20. Booth AO, Lowis C, Dean M, et al. Diet and physical activity in the self-management of type 2 diabetes: barriers and facilitators identified by patients and health professionals.



- 1  
2  
3  
4  
5  
6  
7  
8  
9  
10  
11  
12  
13  
14  
15  
16  
17  
18  
19  
20  
21  
22  
23  
24  
25  
26  
27  
28  
29  
30  
31  
32  
33  
34  
35  
36  
37  
38  
39  
40  
41  
42  
43  
44  
45  
46  
47  
48  
49  
50  
51  
52  
53  
54  
55  
56  
57  
58  
59  
60
- Primary Health Care Research & Development* 2013;14(3):293-306. doi: 10.1017/S1463423612000412
21. Lawton J, Ahmad N, Hanna L, et al. 'I can't do any serious exercise': barriers to physical activity amongst people of Pakistani and Indian origin with Type 2 diabetes. *Health Education Research* 2006;21(1):43-54.
22. Mier N, Medina AA, Ory MG. Mexican Americans with type 2 diabetes: perspectives on definitions, motivators, and programs of physical activity. *Preventing Chronic Disease* 2007;4(2):A24-A24.
23. Wanko NS, Brazier CW, Young-Rogers D, et al. Exercise preferences and barriers in urban African Americans with type 2 diabetes. *The Diabetes Educator* 2004;30(3):502-13.
24. Al-Otaibi HH. Measuring stages of change, perceived barriers and self efficacy for physical activity in Saudi Arabia. *Asian Pacific Journal Of Cancer Prevention: APJCP* 2013;14(2):1009-16.
25. Amin TT, Suleman W, Ali A, et al. Pattern, prevalence, and perceived personal barriers toward physical activity among adult Saudis in Al-Hassa, KSA. *Journal Of Physical Activity & Health* 2011;8(6):775-84.
26. Ali HI, Baynouna LM, Bernsen RM. Barriers and facilitators of weight management: perspectives of Arab women at risk for type 2 diabetes. *Health & social care in the community* 2010;18(2):219-28. doi: 10.1111/j.1365-2524.2009.00896.x
27. Berger G, Peerson A. Giving young Emirati women a voice: participatory action research on physical activity. *Health & Place* 2009;15(1):117-24. doi: 10.1016/j.healthplace.2008.03.003
28. Al-Kaabi J, Al-Maskari F, Saadi H, et al. Physical activity and reported barriers to activity among type 2 diabetic patients in the United arab emirates. *The Review Of Diabetic Studies: RDS* 2009;6(4):271-78. doi: 10.1900/RDS.2009.6.271
29. Serour M, Alqhenaei H, Al-Saqabi S, et al. Cultural factors and patients' adherence to lifestyle measures. *The British Journal Of General Practice: The Journal Of The Royal College Of General Practitioners* 2007;57(537):291-95.
30. Alghafri TS, Alharthi SM, Al-Farsi YM, et al. Correlates of physical activity and sitting time in adults with type 2 diabetes attending primary health care in Oman. Under review, 2017.
31. CDC USA. "Overcoming Barriers to Physical Activity": Centers for Disease Control and Prevention; 2011 [Available from: <http://www.cdc.gov/physicalactivity/everyone/getactive/barriers.html> accessed 16 July 2014.
32. Enhancing the QUALity and Transparency Of health Research. The Strengthening the Reporting of Observational Studies in Epidemiology (STROBE) Statement: guidelines for reporting observational studies 2017 [Available from: <http://www.equator-network.org/reporting-guidelines/strobe/> accessed 22 January 2017.
33. Martin SB, Morrow JR, Jr., Jackson AW, et al. Variables related to meeting the CDC/ACSM physical activity guidelines. *Med Sci Sports Exerc* 2000;32(12):2087-92. [published Online First: 2000/12/29]
34. Ministry of Health Oman. World Health Survey Report, Ministry of Health, Oman. In: studies DoRa, ed. Muscat., 2008.
35. Ministry of National Economy Oman. Statistical Yearbook 2011. In: Ministry of National Economy O, Muscat, Oman, ed., 2011.
36. Ministry of Health Oman. Diabetes management guidelines In: centre E, ed. Oman: MOH, 2015.
37. Matthews L, Kirk A, MacMillan F, et al. Can physical activity interventions for adults with type 2 diabetes be translated into practice settings? A systematic review using the RE-AIM framework. *Translational Behavioral Medicine* 2014;4(1):60-78.



- 1  
2  
3  
4  
5  
6  
7  
8  
9  
10  
11  
12  
13  
14  
15  
16  
17  
18  
19  
20  
21  
22  
23  
24  
25  
26  
27  
28  
29  
30  
31  
32  
33  
34  
35  
36  
37  
38  
39  
40  
41  
42  
43  
44  
45  
46  
47  
48  
49  
50  
51  
52  
53  
54  
55  
56  
57  
58  
59  
60
38. Morrato EH, Hill JO, Wyatt HR, et al. Physical activity in U.S. adults with diabetes and at risk for developing diabetes, 2003. *Diabetes care* 2007;30(2):203-9. doi: 10.2337/dc06-1128 [published Online First: 2007/01/30]
  39. Al-Nozha MM, Al-Hazzaa HM, Arafah MR, et al. Prevalence of physical activity and inactivity among Saudis aged 30-70 years. A population-based cross-sectional study. *Saudi medical journal* 2007;28(4):559-68. [published Online First: 2007/04/26]
  40. Sibai AM, Costanian C, Tohme R, et al. Physical activity in adults with and without diabetes: from the 'high-risk' approach to the 'population-based' approach of prevention. *BMC Public Health* 2013;13:1002-02. doi: 10.1186/1471-2458-13-1002
  41. Alghafri TS, Alharthi SM, Al-Farsi YM, et al. Study protocol for "MOVEdiabetes": a trial to promote physical activity for adults with type 2 diabetes in primary health care in Oman. *BMC Public Health* 2017;17(1):28. doi: 10.1186/s12889-016-3990-0 [published Online First: 2017/01/07]
  42. Thomas N, Alder E, Leese GP. Barriers to physical activity in patients with diabetes. *Postgraduate Medical Journal* 2004;80(943):287-91.
  43. Bauman AE, Reis RS, Sallis JF, et al. Correlates of physical activity: why are some people physically active and others not? *Lancet* 2012;380(9838):258-71. doi: 10.1016/S0140-6736(12)60735-1
  44. Heiss V, Petosa R. Correlates of Physical Activity Among Adults With Type 2 Diabetes: A Systematic Literature Review. *American Journal of Health Education* 2014;45(5):278-87. doi: 10.1080/19325037.2014.933139
  45. Trost SG, Owen N, Bauman AE, et al. Correlates of adults' participation in physical activity: review and update. *Medicine And Science In Sports And Exercise* 2002;34(12):1996-2001.
  46. van Stralen MM, De Vries H, Mudde AN, et al. Determinants of initiation and maintenance of physical activity among older adults: a literature review. *Health Psychology Review* 2009;3(2):147-207. doi: 10.1080/17437190903229462
  47. Kirk A, MacMillan F, Webster N. Application of the Transtheoretical model to physical activity in older adults with Type 2 diabetes and/or cardiovascular disease. *Psychology of Sport and Exercise* 2010;11(4):320-24. doi: <http://dx.doi.org/10.1016/j.psychsport.2010.03.001>
  48. Avery L, Flynn D, Dombrowski SU, et al. Successful behavioural strategies to increase physical activity and improve glucose control in adults with Type 2 diabetes. *Diabet Med* 2015 doi: 10.1111/dme.12738 [published Online First: 2015/03/13]
  49. GCC statistical center. GCC-statistics 2010 [Available from: <https://gccstat.org/en/terms-of-use13/10/2016>].
  50. Bird EL, Baker G, Mutrie N, et al. Behavior change techniques used to promote walking and cycling: a systematic review. *Health Psychol* 2013;32(8):829-38. doi: 10.1037/a0032078 [published Online First: 2013/03/13]
  51. Dutton GR, Provost BC, Tan F, et al. A tailored print-based physical activity intervention for patients with type 2 diabetes. *Preventive Medicine* 2008;47(4):409-11. doi: 10.1016/j.ypmed.2008.06.016
  52. Donnelly TT, Al Suwaidi J, Al Enazi NR, et al. Qatari women living with cardiovascular diseases-challenges and opportunities to engage in healthy lifestyles. *Health Care For Women International* 2012;33(12):1114-34. doi: 10.1080/07399332.2012.712172
  53. Bastiaens H, Sunaert P, Wens J, et al. Supporting diabetes self-management in primary care: pilot-study of a group-based programme focusing on diet and exercise. *Primary Care Diabetes* 2009;3(2):103-09. doi: 10.1016/j.pcd.2009.02.001
  54. Matthews L. The feasibility, effectiveness and implementation of a physical activity consultation service for adults within routine diabetes care. [Implementation of physical activity services for the management of adults with Type 2 Diabetes]. University of Strathclyde School of Psychological Sciences and Health, 2013.

- 1  
2  
3  
4  
5  
6  
7  
8  
9  
10  
11  
12  
13  
14  
15  
16  
17  
18  
19  
20  
21  
22  
23  
24  
25  
26  
27  
28  
29  
30  
31  
32  
33  
34  
35  
36  
37  
38  
39  
40  
41  
42  
43  
44  
45  
46  
47  
48  
49  
50  
51  
52  
53  
54  
55  
56  
57  
58  
59  
60
55. Barrera M, Strycker LA, Mackinnon DP, et al. Social-ecological resources as mediators of two-year diet and physical activity outcomes in type 2 diabetes patients. *Health Psychology: Official Journal Of The Division Of Health Psychology, American Psychological Association* 2008;27(2 Suppl):S118-S25. doi: 10.1037/0278-6133.27.2(Suppl.).S118
56. Borschmann K, Moore K, Russell M, et al. Overcoming barriers to physical activity among culturally and linguistically diverse older adults: a randomised controlled trial. *Australasian Journal On Ageing* 2010;29(2):77-80. doi: 10.1111/j.1741-6612.2009.00390.x
57. Donahue KE, Mielenz TJ, Sloane PD, et al. Identifying supports and barriers to physical activity in patients at risk for diabetes. *Preventing Chronic Disease* 2006;3(4):A119-A19.

**Figure 1: Box and Whisker plots for the reported barrier sum scores of 0-9 (significant scores defined as  $\geq 5$ )**

**Figure 2: Percentage of reported barrier scores  $\geq 5$  by gender**

1  
2  
3  
4  
5  
6  
7  
8  
9  
10  
11  
12  
13  
14  
15  
16  
17  
18  
19  
20  
21  
22  
23  
24  
25  
26  
27  
28  
29  
30  
31  
32  
33  
34  
35  
36  
37  
38  
39  
40  
41  
42  
43  
44  
45  
46  
47  
48  
49  
50  
51  
52  
53  
54  
55  
56  
57  
58  
59  
60

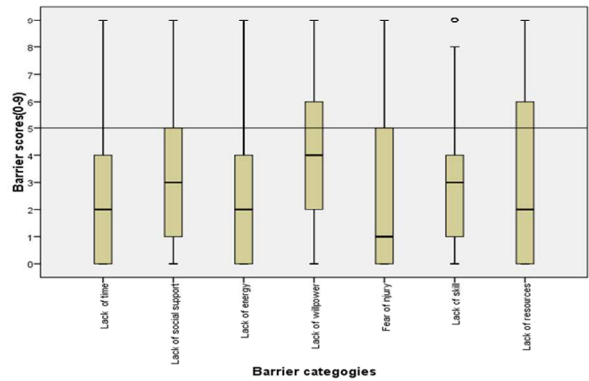

Box and Whisker plots for the reported barrier sum scores of 0-9 (significant scores defined as  $\geq 5$ )

338x190mm (96 x 96 DPI)

review only

1  
2  
3  
4  
5  
6  
7  
8  
9  
10  
11  
12  
13  
14  
15  
16  
17  
18  
19  
20  
21  
22  
23  
24  
25  
26  
27  
28  
29  
30  
31  
32  
33  
34  
35  
36  
37  
38  
39  
40  
41  
42  
43  
44  
45  
46  
47  
48  
49  
50  
51  
52  
53  
54  
55  
56  
57  
58  
59  
60

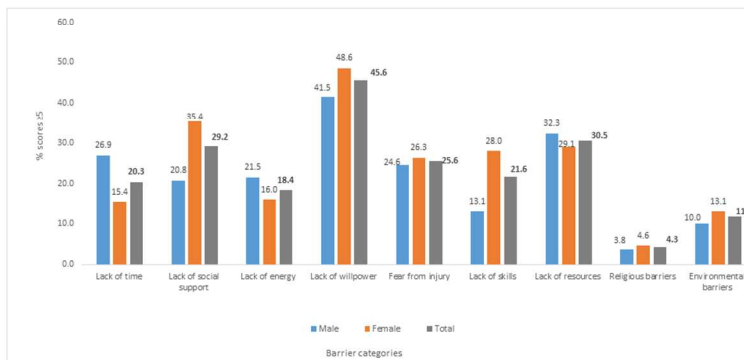

Percentage of reported barrier scores  $\geq 5$  by gender

338x190mm (96 x 96 DPI)

review only

STROBE Statement—checklist of items that should be included in reports of observational studies

|                           | Item No | Page number (where information can be found in the manuscript) |
|---------------------------|---------|----------------------------------------------------------------|
| Title and abstract        | 1       | 1 & 2-3                                                        |
| <b>Introduction</b>       |         |                                                                |
| Background/rationale      | 2       | 4                                                              |
| Objectives                | 3       | 5                                                              |
| <b>Methods</b>            |         |                                                                |
| Study design              | 4       | 5                                                              |
| Setting                   | 5       | 6                                                              |
| Participants              | 6       | 6                                                              |
|                           |         |                                                                |
| Variables                 | 7       | 6                                                              |
| Data sources/ measurement | 8       | 6                                                              |
| Bias                      | 9       | 7                                                              |
| Study size                | 10      | 8                                                              |
| Quantitative variables    | 11      | 8                                                              |
| Participants              | 13      | 8                                                              |
| <b>Results</b>            |         |                                                                |
| Descriptive data          | 14      | 8-9                                                            |
| Outcome data              | 15      | 10-14                                                          |
| Main results              | 16      | 14-15                                                          |
| Other analyses            | 17      | 15                                                             |
| <b>Discussion</b>         |         |                                                                |
| Key results               | 18      | 16-18                                                          |
| Limitations               | 19      | 19                                                             |
| Interpretation            | 20      | 19                                                             |
| Generalisability          | 21      | 19                                                             |
| <b>Other information</b>  |         |                                                                |
| Funding                   | 22      | 20                                                             |

# BMJ Open

## Perceived barriers to leisure time physical activity in adults with type 2 diabetes attending primary health care in Oman (questionnaire survey)

|                                 |                                                                                                                                                                                                                                                                                                                                                                                                                                                                                                                                                                                       |
|---------------------------------|---------------------------------------------------------------------------------------------------------------------------------------------------------------------------------------------------------------------------------------------------------------------------------------------------------------------------------------------------------------------------------------------------------------------------------------------------------------------------------------------------------------------------------------------------------------------------------------|
| Journal:                        | <i>BMJ Open</i>                                                                                                                                                                                                                                                                                                                                                                                                                                                                                                                                                                       |
| Manuscript ID                   | bmjopen-2017-016946.R1                                                                                                                                                                                                                                                                                                                                                                                                                                                                                                                                                                |
| Article Type:                   | Research                                                                                                                                                                                                                                                                                                                                                                                                                                                                                                                                                                              |
| Date Submitted by the Author:   | 20-Jun-2017                                                                                                                                                                                                                                                                                                                                                                                                                                                                                                                                                                           |
| Complete List of Authors:       | Alghafri, Thamra; Ministry of Health, Planning<br>Alharthi, Saud; Ministry of Health, Medicine<br>Al-Farsi, Yahya; Sultan Qaboos University College of Medicine and Health Science, FAMCO<br>Bannerman, Elaine; Ninewells Hospital and Medical School., Centre for Public Health Nutrition Research, University of Dundee<br>Craigie, Angela; Centre for Research into Cancer Prevention and Screening, Medical Research Institute, University of Dundee<br>Anderson, Annie; Ninewells Hospital and Medical School, Centre for Public Health Nutrition Research, University of Dundee |
| <b>Primary Subject Heading</b>: | Diabetes and endocrinology                                                                                                                                                                                                                                                                                                                                                                                                                                                                                                                                                            |
| Secondary Subject Heading:      | Sports and exercise medicine                                                                                                                                                                                                                                                                                                                                                                                                                                                                                                                                                          |
| Keywords:                       | Physical Activity, Type 2 diabetes, Primary health care, Barriers, Oman, General diabetes < DIABETES & ENDOCRINOLOGY, PUBLIC HEALTH, SPORTS MEDICINE                                                                                                                                                                                                                                                                                                                                                                                                                                  |
|                                 |                                                                                                                                                                                                                                                                                                                                                                                                                                                                                                                                                                                       |

SCHOLARONE™  
Manuscripts



1  
2  
3  
4  
5  
6  
7  
8  
9  
10  
11  
12  
13  
14  
15  
16  
17  
18  
19  
20  
21  
22  
23  
24  
25  
26  
27  
28  
29  
30  
31  
32  
33  
34  
35  
36  
37  
38  
39  
40  
41  
42  
43  
44  
45  
46  
47  
48  
49  
50  
51  
52  
53  
54  
55  
56  
57  
58  
59  
60

24 **TRANSPARENCY DECLARATION:** This manuscript is an honest, accurate, and  
25 transparent account of the study being reported. There are no important aspects of the  
26 study that are omitted; and any possible discrepancies from the study are explained.

27 **TECHNICAL APPENDIX:** Data generated from this study is not available for public  
28 use. However it is available from the corresponding author on reasonable request and  
29 approvals from Oman Ministry of Health.

30 **FUNDING:** The Oman Ministry of Health funded this project.

31 **CONFLICTS OF INTEREST:** No competing interests.

## 32 **ABSTRACT**

33 **Objectives:** Physical activity is fundamental in diabetes management for good  
34 metabolic control. This study aimed to identify barriers to performing leisure time  
35 physical activity and explore differences based on gender, age, marital status,  
36 employment, education, income and perceived stages of change in physical activity in  
37 adults with type 2 diabetes in Oman.

38 **Design:** Cross-sectional study using an Arabic version of the “Barriers to Being Active”  
39 27 item questionnaire, socio-demographic information and questions on perceived  
40 stages of change in physical activity.

41 **Setting:** Seventeen primary health care centres randomly selected in Muscat, Oman.

42 **Participants:** Individuals >18 years with type 2 diabetes, attending diabetes clinic for >  
43 2 years and with no contraindications to performing physical activity.

### 44 **Primary and secondary outcome measures:**

45 Participants were asked to rate how far different factors influenced their physical  
46 activity, under the following categories: fear of injury, lack of time, social support,



1  
2 47 energy, willpower, skills, resources, religion and environment. On a scale of 0-9,  
3  
4 48 barriers were considered important if scored  $\geq 5$ .

5  
6  
7  
8 49 **Results:** A total of 305 questionnaires were collected. Most (96%) reported at least one  
9  
10 50 barrier to performing leisure time physical activity. Lack of willpower (44.4%), lack of  
11  
12 51 resources (30.5%) and lack of social support (29.2%) were the most frequently reported  
13  
14 52 barriers. Using chi-square test, lack of willpower was significantly different in  
15  
16 53 individuals with low vs high income (54.2% vs 40%,  $P=0.002$ ) and in those reporting  
17  
18 54 inactive vs active stages of change for physical activity (50.7% vs 34.7%,  $P=0.029$ ),  
19  
20 55 lack of resources was significantly different in those with low vs high income (40% vs  
21  
22 56 24.3%,  $P=0.004$ ) and married vs unmarried (33.8% vs 18.5%,  $P=0.018$ ). Lack of social  
23  
24 57 support was significant in females vs males (35.4% vs 20.8%,  $P=0.005$ ).

25  
26  
27  
28 58 **Conclusions:** These findings suggest that physical activity interventions should be cost  
29  
30 59 neutral and target psycho-social factors including self-efficacy and social support.

31  
32  
33 60 **Key words:** Physical Activity, Type 2 diabetes, Primary health care, Barriers, Oman

## 34 35 36 61 **ARTICLE SUMMARY**

### 37 38 62 **Strengths and limitations of this study**

- 39  
40  
41 63 ▪ Barriers to performing leisure physical activity for adults with type 2 diabetes were  
42  
43 64 investigated in Oman where prevalence of both diabetes and physical inactivity is  
44  
45 65 high.
- 46  
47 66 ▪ Questions on possible barriers to performing physical activity linked to religion and  
48  
49 67 environment were included.
- 50  
51 68 ▪ The tool used in this study was an English to Arabic language translated  
52  
53 69 questionnaire that may have affected the validity of questions.
- 54  
55 70 ▪ The subjective nature of self-reports may have limited the accuracy of outcomes.
- 56  
57  
58  
59  
60

## 71 INTRODUCTION

72 Oman is located in Southwest Asia on the Southeast coast of the Arabian Peninsula.  
73 Similar to its neighbouring countries (United Arab Emirates, Saudi Arabia, Qatar,  
74 Bahrain, and Kuwait), Oman has witnessed enormous economic advancement in recent  
75 decades, along with significant increases in non-communicable diseases including a  
76 rising prevalence of diabetes. Diabetes prevalence in Oman has increased from 8.3% in  
77 1991 to 12.3% in 2008 and recent estimates are in the order of 14.8%, exceeding global  
78 rates.<sup>1 2</sup> The World Health Organization (WHO) has indicated that physical inactivity is  
79 one of the top ten leading global causes of mortality and disability worldwide, and the  
80 principal cause for approximately 27% of diabetes, and approximately 30% of ischemic  
81 heart disease.<sup>3</sup> In Oman, it has been reported that almost 70% of the population are  
82 physically inactive (daily activity of  $\leq 10$  minutes).<sup>4</sup> This raises concerns regarding the  
83 impact these high levels of physical inactivity may be having on lifestyle related chronic  
84 diseases including diabetes, on health care expenditures and overall population health.<sup>5</sup>

85 The protective effects of physical activity (PA) in the management of diabetes,  
86 specifically type 2 diabetes (T2D), have been widely reported.<sup>6 7</sup> WHO recommends at  
87 least 150 minutes of moderate to vigorous physical activity or 75 minutes of vigorous  
88 PA/week.<sup>8</sup> However, over 60% of patients with diabetes in western countries do not  
89 meet the recommended levels of PA.<sup>9 10</sup> The Oman World Health Survey (OWHS)  
90 2008, reported that in Oman, only 15% of patients with diabetes (98% of them with type  
91 2 diabetes) met PA recommendations using the Global Physical Activity Questionnaire  
92 (GPAQ).<sup>2</sup>

93 The importance of leisure time PA in meeting PA recommendations is consistently<sup>11</sup>  
94 associated with reduced mortality risks (20% to >37% risk reduction) and favourable  
95 cardiovascular outcomes.<sup>12</sup> This relationship appears to have a dose-response effect  
96 where the upper threshold for mortality benefit occurs at 3 to 5 times the leisure PA

1  
2 97 recommendations of 7.5-<15 MET h/wk.<sup>12</sup> No clear association is observed for  
3  
4 98 occupational or travel physical activity.<sup>13</sup>  
5  
6  
7 99 Theoretical models underpinning effective interventions to promote personalized PA  
8  
9 100 (contents, methods and approaches) should focus on benefits and ways to overcome  
10  
11 101 barriers to PA.<sup>14</sup> Literature to date mainly from western countries has reported a number  
12  
13 102 of potential barriers to performing PA in adults with diabetes. These include lack of  
14  
15 103 time,<sup>15-18</sup> physical constrains including pain,<sup>19</sup> lack of knowledge and limited facilities.<sup>20</sup>  
16  
17  
18 104 Differences in reporting barriers to PA have been noted across genders, age groups,  
19  
20 105 environments, cultures and disease status. Female gender, increasing age, unsafe  
21  
22 106 neighbourhoods, being overweight and being a smoker increased the odds of reporting  
23  
24 107 barriers to PA among migrant populations like African Americans, South Asian British  
25  
26 108 and Mexican Americans.<sup>21-23</sup> In the Arab countries, modest evidence on barriers to PA  
27  
28 109 in both the general population and in adults with T2D suggests that lack of time, co-  
29  
30 110 existing diseases and adverse weather conditions<sup>14 24-29</sup> are the main factors. Moreover,  
31  
32 111 the climate in this region may be a drawback to meeting recommended levels of PA due  
33  
34 112 to high temperatures during the day, particularly in the sandy/desert areas. During the  
35  
36 113 summer months, these countries including Oman experience major heat waves (>40  
37  
38 114 degrees celsius) and humidity levels that could reach 90%.  
39  
40  
41  
42 115 The current study aimed to identify barriers to performing leisure-time PA in adults  
43  
44 116 with T2D in Oman, and the distribution of barrier scores across different socio-  
45  
46 117 demographic characteristics and perceived stages of change in PA.  
47  
48  
49  
50  
51  
52  
53  
54  
55  
56  
57  
58  
59  
60

1  
2  
3  
4  
5  
6  
7  
8  
9  
10  
11  
12  
13  
14  
15  
16  
17  
18  
19  
20  
21  
22  
23  
24  
25  
26  
27  
28  
29  
30  
31  
32  
33  
34  
35  
36  
37  
38  
39  
40  
41  
42  
43  
44  
45  
46  
47  
48  
49  
50  
51  
52  
53  
54  
55  
56  
57  
58  
59  
60

118 **METHODS**

119 **Study design, setting and participants**

120 This cross-sectional interview based study was part of a larger study that examined  
121 correlates of physical activity and sitting time in adults with type 2 diabetes, and  
122 barriers to leisure physical activity in the same population. Results regarding the PA  
123 patterns of the population using the Global Physical Activity Questionnaire are  
124 reported elsewhere.<sup>30</sup> This current paper identified barriers to performing leisure  
125 physical activity expressed by Omani adults with T2D using adapted questions from the  
126 Centers for Disease Control and Prevention (CDC) questionnaire<sup>31</sup> conducted in April/  
127 May 2015 in Muscat (Urban communities). Reporting of this study follows the  
128 guidelines for strengthening the reporting of observational studies in epidemiology  
129 (STROBE).<sup>32</sup>

130 All patients with T2D attending their routine diabetes clinics in 17 randomly selected  
131 primary health care centres in Muscat were approached to take part in the study.  
132 Inclusion criteria were age >18 years and being followed up in a diabetes clinic for >2  
133 years and ability to provide informed consent. For illiterate participants, informed  
134 consents were taken from their spouse, son, daughter or other close family member.  
135 Participants with type 1 diabetes, newly diagnosed (<6 months) or who had difficulty in  
136 performing any physical activity, including history of myocardial infarction of <6  
137 months and multiple organ failure, were excluded.

138 **Data sources/ measurement**

139 In addition to recording physiological data [Body Mass Index (BMI), medication,  
140 duration of diabetes, blood pressure (BP), lipid profile, and comorbidities coinciding  
141 with diabetes] from the electronic health system, a multi-section questionnaire with a

1  
2 142 range of answers in closed format was administered by a trained interviewer. The  
3  
4 143 following information was collected:

5  
6 144 *Socio-demographic data:* included gender, age, marital status, education, household  
7  
8 145 income, and employment.

9  
10  
11 146 *Perceptions on stage of change in physical activity:* Based on the trans-theoretical  
12  
13 147 theory of behaviour change,<sup>33</sup> subjects were asked to identify their perceived stage of  
14  
15 148 change in physical activity. Participants were to select “Maintenance stage” if they were  
16  
17 149 participating in moderate physical activity five or more times per week or in vigorous  
18  
19 150 activity three to five times per week longer than six consecutive months or select  
20  
21 151 “Action stage” if less than six months. “Preparation stage” was selected by subjects who  
22  
23 152 were thinking about starting exercise such as walking in the near future, or doing  
24  
25 153 vigorous activity less than three times per week, or moderate activity less than five  
26  
27 154 times per week. Contemplation stage “getting ready” was selected by subjects who were  
28  
29 155 thinking about starting exercise or walk in the next six months. Subjects who were not  
30  
31 156 thinking about starting any PA in the near future selected pre-contemplation stage “not  
32  
33 157 ready”.

34  
35  
36  
37  
38 158 *CDC questionnaire on barriers to leisure PA:*

39  
40  
41 159 An English to Arabic translated CDC questionnaire “Barriers to Being Active” was  
42  
43 160 used in a study in Saudi Arabia<sup>14</sup> with 21 questions on seven barriers (lack of time, lack  
44  
45 161 of social support, lack of energy, lack of willpower, fear of injury, lack of skill and lack  
46  
47 162 of resources). Permission to use the questionnaire was obtained from the lead author on  
48  
49 163 November 24, 2014  
50  
51 164 (<https://www.ncbi.nlm.nih.gov/pmc/articles/PMC2813614/figure/F0001/>). However, in  
52  
53 165 that tool no statements on religion or environment as possible barriers to PA were  
54  
55 166 included. To address this gap and to formulate robust items on these topics we  
56  
57  
58  
59  
60

1  
2  
3  
4  
5  
6  
7  
8  
9  
10  
11  
12  
13  
14  
15  
16  
17  
18  
19  
20  
21  
22  
23  
24  
25  
26  
27  
28  
29  
30  
31  
32  
33  
34  
35  
36  
37  
38  
39  
40  
41  
42  
43  
44  
45  
46  
47  
48  
49  
50  
51  
52  
53  
54  
55  
56  
57  
58  
59  
60

167 undertook several procedures. Literature search was conducted to identify possible  
168 content for the new items from similar studies in neighbour countries with similar socio-  
169 economical characteristics.<sup>28 29</sup> Potential religious barriers considered questions on  
170 religious beliefs restricting PA, accepted clothing for PA and religious perceptions on  
171 PA.<sup>14 25 26</sup> Potential environmental barriers included questions on extreme weather  
172 conditions, physical activity in summer time and availability of appropriate environment  
173 for PA.<sup>16 25</sup> Content and face validity of the questionnaire were assessed by our  
174 investigatory team and draft questions were then discussed with a sample of patients  
175 prior to field testing and adjustments were made to ease comprehension and ensure  
176 translation to Arabic was appropriate.

177 A set of three related questions (total of 27 questions) presented in random order within  
178 the questionnaire represented one barrier category. A scoring system<sup>31</sup> was used to  
179 indicate how likely each statement/item was considered to be a barrier (very likely=3,  
180 somewhat likely=2, somewhat unlikely=1, very unlikely=0). Scores of the three theme-  
181 related questions were added up to provide a total for each category of barriers. Possible  
182 scores for each barrier category ranged from 0-9. A score of  $\geq 5$  was considered as an  
183 important barrier to overcome.<sup>31</sup> A copy of the used (Arabic) questionnaire can be found  
184 in online supplementary material.

185 To ensure common understanding and acceptability, an interview recording was  
186 undertaken in Muscat in 25 randomly selected adult with type 2 diabetes (population of  
187 interest) outside the sampled health centres of the study. Results were discussed and  
188 reviewed by the investigation team and an independent statistician.

189 Based on the data from the current study, the scale quality (27 item study questionnaire)  
190 including internal consistency reliability measures were investigated through the use of  
191 Factor Analysis using SPSS v22 and supported by McDonald's coefficient omega using  
192 the free and open source R.<sup>34 35</sup>

1  
2  
3  
4  
5  
6  
7  
8  
9  
10  
11  
12  
13  
14  
15  
16  
17  
18  
19  
20  
21  
22  
23  
24  
25  
26  
27  
28  
29  
30  
31  
32  
33  
34  
35  
36  
37  
38  
39  
40  
41  
42  
43  
44  
45  
46  
47  
48  
49  
50  
51  
52  
53  
54  
55  
56  
57  
58  
59  
60

193 **Study size**

194 Power analysis was performed to estimate the prevalence of meeting PA  
195 recommendations in adult population with T2D in a parallel study conducted in the  
196 same population.<sup>36</sup> We assumed that meeting PA recommendation is indirectly related  
197 to reporting less barriers to PA<sup>37</sup> and used an estimated 15% prevalence of adequate PA  
198 in patients with diabetes, as reported in the 2008 Oman World Health Survey  
199 (OWHS).<sup>38</sup> Using 95% confidence limits, a response rate of 80%, and a precision of +/-  
200 4%, and smallest expected frequency of 15%, the calculated sample size was ~300  
201 participants across primary health centres in Muscat region, the capital of Oman.

202 **Training**

203 A multidisciplinary team of two nurses, one senior dietician, one medical orderly and  
204 two doctors were recruited for data collection. A one day training on administration of  
205 the questionnaire was delivered by the national focal point on PA in Oman Ministry of  
206 Health. Data entry, cross-checking and cleaning was done through Epi Info™ 7 by an  
207 independent personnel. Entered data was transferred to SPSS v22 for analysis and  
208 subsequent results.

209 **Statistical methods**

210 Descriptive statistics were expressed as percentages and mean (SD), median (quartiles)  
211 to describe the study sample characteristics. Sum of scores from the three related  
212 questions per category (range from 0-9) were expressed as median (LQ, UQ). Data were  
213 dichotomised to scores <5 and  $\geq 5$  to determine the highly reported barriers as advised  
214 in the CDC questionnaire and practised in a study in Saudi Arabia.<sup>31</sup> Chi-square  
215 analysis was carried out to identify with the distribution of the high barrier scores ( $\geq 5$ )  
216 across the independent sociodemographic factors including gender (male vs female);



1  
2  
3  
4  
5  
6  
7  
8  
9  
10  
11  
12  
13  
14  
15  
16  
17  
18  
19  
20  
21  
22  
23  
24  
25  
26  
27  
28  
29  
30  
31  
32  
33  
34  
35  
36  
37  
38  
39  
40  
41  
42  
43  
44  
45  
46  
47  
48  
49  
50  
51  
52  
53  
54  
55  
56  
57  
58  
59  
60

217 age (to ensure sufficient power and adequate numbers for further statistical analysis the  
218 population was divided by the mean age  $\leq 57$  vs  $< 57$  years); marital status (currently  
219 unmarried vs married); education (those unable to read or write (“uneducated”) vs.  
220 those having attended primary school or beyond (“educated”); household income ( $< 500$   
221 vs  $\geq 500$  Omani rials - ‘OR’); and employment (unemployed, including those retired vs  
222 employed). Self-reported stage of change in PA was expressed as one of two categories:  
223 inactive if reporting “pre-contemplation” or “contemplation” and potentially active if  
224 reporting being at “preparation”, “action”, or “maintenance” stages of PA. Corrected P-  
225 values (Yate’s continuity) were reported for high barrier scores against the studied  
226 independent variables.

## 227 **RESULTS**

### 228 **Socio-demographic**

229 Out of 312 patients approached, 305 (98%) completed the questionnaire. Slightly more  
230 females were represented in this sample (57.4%) than males. The population was  
231 slightly older with mean (SD) age of 57(10.8) years. Additionally, more than two-thirds  
232 being married (78.8%) and just about half unable to read or write (48.9%). More than a  
233 third of the study population (39.3%) reported household income of  $< 500$  OR (less than  
234 national average)<sup>39</sup> and the majority (77%) reported unemployment (including  
235 retirement). More males than females were educated (70% vs 37%) and employed (45%  
236 vs 7%) (Table 1).

### 237 **Physiological status**

238 Median (LQ, UQ) duration of diabetes in this population was 6.0 (4.0, 10.0) years. The  
239 majority of the participants had hypertension (n=217, 71%) or/and hyperlipidaemia  
240 (n=189, 62%) coinciding with their diabetes. All of them were using anti-hypertensive  
241 or/and lipid lowering medications as appropriate. More than three-quarters of those



242 taking anti-hypertensives (78%) and two-thirds of those using lipid lowering drugs  
 243 (66%) had blood pressure (BP) readings and fasting serum cholesterol within target  
 244 levels (BP<140/80 mmHg and fasting serum cholesterol of <5mmol/l).<sup>40</sup> Fifteen percent  
 245 (n=45) were controlling their diabetes by diet alone versus 85% (n=260) on oral anti-  
 246 hypoglycaemic medications, in which 25% (n=75) were additionally on insulin. Mean  
 247 (SD) BMI was 31.0 (6.0) kg/m<sup>2</sup> where 89% (n=271) had BMI >25kg/m<sup>2</sup> in which 50%  
 248 (n=153) were obese (BMI>30 kg/m<sup>2</sup>) and 39% (n=118) were overweight (BMI>25-  
 249 29.99 kg/m<sup>2</sup>). Glycated haemoglobin HbA1c was >7% (>48 mmol/mol) in more than  
 250 half of the population (58%) indicating poor diabetes control (Table 1).

### 251 Self-reported stages of PA

252 Only 17% (n=52) of participants considered themselves actively participating in regular  
 253 moderate or vigorous PA (22% of males vs 13% of females). Of the remainder, the  
 254 majority reported being “not ready” (37%), “getting ready” (31%) or in “preparation”  
 255 (15%) (Table 1).

256 **Table 1: Selected participants characteristics**

| Population characteristics | Total population<br>n=305(100%) |
|----------------------------|---------------------------------|
| <b>Gender</b>              |                                 |
| Male                       | 130(42.6)                       |
| Female                     | 175(57.4)                       |
| <b>Age (years)</b>         |                                 |
| ≤57                        | 155(51)                         |
| >57                        | 150(49)                         |
| <b>Marital status</b>      |                                 |
| Currently unmarried        | 65(21)                          |
| Currently married          | 240(79)                         |
| <b>Education</b>           |                                 |
| Not educated               | 149(49)                         |
| Educated                   | 156(51)                         |
| <b>Income</b>              |                                 |
| <500 OR                    | 120(39)                         |
| ≥500 OR                    | 185(61)                         |
| <b>Employment</b>          |                                 |

|                                                   |                                       |                             |     |
|---------------------------------------------------|---------------------------------------|-----------------------------|-----|
|                                                   | Not employed                          | 234(77)                     | 257 |
|                                                   | Employed                              | 71(23)                      |     |
| <b>Physiological</b>                              |                                       |                             |     |
|                                                   | Duration of diabetes (years)          | Median (LQ, UQ)<br>6(4, 10) |     |
| <b>Self-reported comorbidities*</b>               |                                       |                             |     |
|                                                   | Yes                                   | 277(91)                     | 262 |
|                                                   | No                                    | 28 (9)                      | 263 |
| <b>Current medication</b>                         |                                       |                             |     |
|                                                   | Anti-HTN                              | 217(71)                     | 266 |
|                                                   | Lipid lowering drugs                  | 189(62)                     | 267 |
|                                                   | Oral-hypoglycaemic drugs              | 260(85)                     | 268 |
|                                                   | Oral-hypoglycaemic drugs with Insulin | 75(25)                      | 269 |
|                                                   | Diet control                          | 45(15)                      | 270 |
|                                                   |                                       |                             | 271 |
|                                                   |                                       |                             | 272 |
| <b>Blood pressure (systolic/diastolic) mmHg**</b> |                                       |                             |     |
|                                                   | Within target (<140/<80)              | 237(78)                     | 274 |
|                                                   | High (≥140/≥80)                       | 68(22)                      | 275 |
|                                                   |                                       |                             | 276 |
| <b>Fasting lipid profile (mmol/l)**</b>           |                                       |                             |     |
|                                                   | Cholesterol within target (< 5.0)     | 201(66)                     | 278 |
|                                                   | Cholesterol high (≥5.0)               | 104(34)                     | 279 |
|                                                   |                                       |                             | 280 |
| <b>Body Mass Index (kg/m<sup>2</sup>)**</b>       |                                       |                             |     |
|                                                   | Healthy weight range (18.5-24.99)     | 34(11)                      | 282 |
|                                                   | Overweight (>25-29.99)                | 118(39)                     | 283 |
|                                                   | Obese (>30)                           | 153(50)                     | 284 |
|                                                   |                                       |                             | 285 |
|                                                   |                                       |                             | 286 |
| <b>HbA1c(%)**(&gt;48 mmol/mol)</b>                |                                       |                             |     |
|                                                   | Normal ≤7%                            | 127(42)                     | 287 |
|                                                   | High >7%                              | 178(58)                     | 288 |
|                                                   |                                       |                             | 289 |
| <b>Self-reported stages of PA</b>                 |                                       |                             |     |
|                                                   | Not ready (Pre-contemplation)         | 112(37)                     | 290 |
|                                                   | Getting ready(contemplation)          | 95(31)                      | 291 |
|                                                   | Preparation                           | 46(15)                      | 292 |
|                                                   | Action                                | 14(5)                       | 293 |
|                                                   | Maintenance                           | 38(12)                      | 294 |
|                                                   |                                       |                             | 295 |
|                                                   |                                       |                             | 296 |

\*Reported hypertension

297 n, hyperlipidaemia, thyroid dysfunction or any other chronic condition coinciding with diabetes.

298 \*\*Oman diabetes mellitus management guidelines (2015)<sup>40</sup>

### 299 **CDC questionnaire on barriers to leisure PA**

300 The majority of the population, 97.7% (n=298), reported at least one barrier to  
 301 performing leisure physical activity median (LQ, UQ) was 6 (4, 7). Population  
 302 distributions were not normal across all reported barrier categories. Median sum scores  
 303 were all <5 as illustrated in (Figure 1). Except for reporting lack of willpower and lack  
 304 of resources, 75% of sum scores of other reported barriers were ≤ 5.

305

306 

---

 INSERT FIGURE 1 ABOUT HERE

12

1  
2 307 \_\_\_\_\_  
3 308 Categorizing barrier scores to  $<5$  and  $\geq 5$  (significant barrier) highlighted that ‘lack of  
4  
5 309 willpower’ (n=139), ‘lack of resources’ (n=93) and ‘lack of social support’ (n=89) were  
6  
7 310 the most frequently reported ‘significant barriers’ to physical activity (Figure 2).  
8  
9 311 Barriers found to be significant in both males and females were lack of willpower  
10  
11 312 (41.5% m: 48.6% f) and lack of resources (32.3% m: 29.1% f). In addition, lack of time  
12  
13 313 in males (26.9%) and lack of social support in females (35.4%) were also noteworthy  
14  
15 314 (Table 2).  
16  
17  
18  
19

20 315 \_\_\_\_\_  
21 316 INSERT FIGURE 2 ABOUT HERE  
22

23 317 \_\_\_\_\_  
24 318 Distributions of significant high barrier score ( $\geq 5$ ) across the studied sociodemographic  
25  
26 319 factors and self-reported stages of change in PA differed among the nine barrier  
27  
28 320 categories: “Lack of time” was frequently highly scored by males, younger adults and  
29  
30 321 those who were married, employed or educated. Additionally, “Lack of social support”  
31  
32 322 was highly scored by females and “Lack of energy” by employed, or educated adults.  
33  
34 323 However, “Lack of willpower” was highly scored by individuals with lower income, or  
35  
36 324 at inactive stages of PA. Moreover, “Fear of injury” was highly scored by older adults,  
37  
38 325 unemployed, uneducated, or individuals reporting in-active stages of PA. Furthermore,  
39  
40 326 “Lack of skills” was highly scored by females, younger adults, and unemployed or  
41  
42 327 uneducated. “Lack of resources” on the other hand, was frequently highly scored by  
43  
44 328 married adults or with lower income. It is notable that the religious and environmental  
45  
46 329 barriers had no significant different distributions across any of the studied factors (Table  
47  
48 330 2)  
49  
50  
51  
52  
53  
54  
55  
56  
57  
58  
59  
60

**Table 2: Distribution of high barrier scores ( $\geq 5$ ) to leisure physical activity in adult population with type 2 diabetes across sociodemographic variables and self-reported stages of change in physical activity (n=305).**

| (%) Scores $\geq 5$ | Lack of time | Lack of social support | Lack of energy | Lack of willpower | Fear of injury | Lack of skills | Lack of resources | Religious barriers | Environmental barriers |
|---------------------|--------------|------------------------|----------------|-------------------|----------------|----------------|-------------------|--------------------|------------------------|
| Gender:             |              |                        |                |                   |                |                |                   |                    |                        |
| Male                | 26.6         | 20.8                   | 21.5           | 41.5              | 24.6           | 13.1           | 32.3              | 3.8                | 10.0                   |
| Female              | 15.4         | 35.4                   | 16.0           | 48.6              | 26.3           | 28.0           | 29.1              | 4.6                | 13.1                   |
| Corrected $\chi^2$  | 5.4          | 7.1                    | 1.2            | 1.2               | 0.04           | 8.9            | 0.2               | 0.001              | 0.4                    |
| (P-value)           | (0.020)*     | (0.008)*               | (0.278)        | (0.270)           | (0.843)        | (0.003)*       | (0.640)           | (0.981)            | (0.508)                |
| Age:                |              |                        |                |                   |                |                |                   |                    |                        |
| $\leq 57$           | 27.7         | 26.5                   | 21.3           | 45.8              | 18.7           | 16.1           | 33.5              | 4.5                | 12.3                   |
| $> 57$              | 12.7         | 32.0                   | 15.3           | 45.3              | 32.7           | 27.3           | 27.3              | 4.0                | 11.3                   |
| Corrected $\chi^2$  | 9.7          | 0.9                    | 1.4            | 0.0               | 7.1            | 5.0            | 1.1               | 0.00               | 0.0                    |
| (P-value)           | (0.002)*     | (0.347)                | (0.232)        | (1.000)           | (0.008)*       | (0.025)*       | (0.292)           | (1.000)            | (0.942)                |
| Marital status:     |              |                        |                |                   |                |                |                   |                    |                        |
| Unmarried           | 10.8         | 35.4                   | 16.9           | 43.1              | 30.8           | 24.6           | 18.5              | 7.7                | 13.8                   |
| Married             | 22.9         | 27.5                   | 18.8           | 46.3              | 24.2           | 20.8           | 33.8              | 3.3                | 11.3                   |
| Corrected $\chi^2$  | 3.9          | 1.2                    | 0.0            | 0.1               | 0.9            | 0.2            | 4.9               | 1.4                | 0.1                    |
| (P-value)           | (0.047)*     | (0.277)                | (0.875)        | (0.753)           | (0.356)        | (0.626)        | (0.026)*          | (0.231)            | (0.720)                |
| Employment:         |              |                        |                |                   |                |                |                   |                    |                        |
| Un-employed         | 12.4         | 31.6                   | 14.5           | 47.0              | 29.5           | 25.6           | 31.6              | 4.7                | 11.5                   |
| Employed            | 46.5         | 21.1                   | 31.0           | 40.8              | 12.7           | 8.5            | 26.8              | 2.8                | 12.7                   |
| Corrected $\chi^2$  | 37.0         | 2.4                    | 8.8            | 0.6               | 7.2            | 8.5            | 0.4               | 0.1                | 0.0                    |
| (P-value)           | (<0.001)*    | (0.120)                | (0.003)*       | (0.437)           | (0.007)*       | (0.004)*       | (0.527)           | (0.740)            | (0.960)                |
| Education:          |              |                        |                |                   |                |                |                   |                    |                        |
| Un-educated         | 11.4         | 33.6                   | 13.4           | 45.6              | 35.6           | 28.2           | 29.5              | 6.0                | 10.7                   |
| Educated            | 28.8         | 25.0                   | 23.1           | 45.5              | 16.0           | 15.4           | 31.4              | 2.6                | 12.8                   |

1  
2  
3  
4  
5  
6  
7  
8  
9  
10  
11  
12  
13  
14  
15  
16  
17  
18  
19  
20  
21  
22  
23  
24  
25  
26  
27  
28  
29  
30  
31  
32  
33  
34  
35  
36  
37  
38  
39  
40  
41  
42  
43  
44  
45  
46  
47  
48  
49

|                             |           |         |          |          |           |          |          |         |         |
|-----------------------------|-----------|---------|----------|----------|-----------|----------|----------|---------|---------|
| Corrected $\chi^2$          | 13.2      | 2.3     | 4.1      | 0.0      | 14.2      | 6.6      | 0.1      | 1.5     | 0.1     |
| (P-value)                   | (<0.001)* | (0.129) | (0.042)* | (1.0)    | (<0.001)* | (0.010)* | (0.816)  | (0.162) | (0.700) |
| Income:                     |           |         |          |          |           |          |          |         |         |
| <500                        | 16.7      | 26.7    | 21.7     | 54.2     | 20.8      | 23.3     | 40.0     | 5.8     | 8.3     |
| >=500                       | 22.7      | 30.8    | 16.2     | 40.0     | 28.6      | 20.5     | 24.3     | 3.2     | 14.1    |
| Corrected $\chi^2$          | 1.3       | 0.4     | 1.1      | 5.3      | 1.9       | 0.2      | 7.7      | 0.6     | 1.8     |
| (P-value)                   | (0.257)   | (0.516) | (0.294)  | (0.021)* | (0.163)   | (0.663)  | (0.005)* | (0.422) | (0.183) |
| Self-reported stages of PA: |           |         |          |          |           |          |          |         |         |
| Not active                  | 18.4      | 28.5    | 17.9     | 50.7     | 31.9      | 24.2     | 29.5     | 4.3     | 13.5    |
| Active                      | 24.5      | 30.6    | 19.4     | 34.7     | 12.2      | 16.3     | 32.7     | 4.1     | 8.2     |
| Corrected $\chi^2$          | 1.2       | 0.1     | 0.0      | 6.2      | 12.5      | 2.0      | 0.2      | 0.00    | 1.4     |
| (P-value)                   | (0.276)   | (0.808) | (0.873)  | (0.012)* | (<0.001)* | (0.161)  | (0.667)  | (1.0)   | (0.244) |

\* Significant at P<0.05

## 1 Factor analysis and reliability test results

2 Initially, the factorability of the 27 items/questions was examined. The Kaiser-Meyer-  
3 Olkin (KMO) measure of sampling adequacy was 0.7, above the commonly  
4 recommended value of 0.6. Bartlett's test of sphericity (test of at least one significant  
5 correlation between 2 of the items studied) was also significant ( $\chi^2(351) = 2600.175, p$   
6  $< .05$ ).<sup>41</sup> The communalities (proportion of item's variance explained by the extracted  
7 factors) were all above 0.3, further confirming that each item shared some common  
8 variance with other items. Given these overall indicators, factor analysis was regarded  
9 to be suitable with all the 27 items/questions.

10 Principal components analysis (PCA) was used because the primary purpose was to  
11 identify composite scores for the factors underlying the items/questions in the study  
12 scale. Initial eigenvalues (statistical values used in deciding how many factors to extract  
13 in the overall factor analysis where values of  $\geq 1.0$  are considered statistically sound)<sup>42</sup>  
14 indicated that the first eight factors (namely fear of injury, environmental barriers, lack  
15 of willpower, lack of time/ lack of energy, lack of resources, religious barriers, lack of  
16 skills/ lack of social support and lack of energy) explained 13.1%, 11.4%, and 9.2%,  
17 9.0%, 7.2%, 5.1%, 4.3% and 3.8% of the variance respectively.

18 None of the 27 items/questions were eliminated because they all met a minimum criteria  
19 of having a primary factor loading of 0.45 or above (magnitude of item-factor  
20 relationship desirable at  $\geq 0.3$ ). Majority of the factor loadings within the study  
21 items/questions were in the same direction of the barrier categories except for  
22 items/questions related to lack of energy (Q3 & 17) and lack of social support (Q2 & 16)  
23 which loaded up with lack of time (Q1, 8 & 15) and lack of skills (Q6 & 13)  
24 respectively indicating cross contributions. McDonald's coefficient Omega was equal to  
25 0.75 indicating moderate reliability of the scale.<sup>42</sup>

26 Further Factor analysis and reliability tests were conducted on the studied barrier  
 27 subscales (3 questions per barrier). Table 3 provides the KMO values, factor loadings,  
 28 communalities and McDonald's coefficient Omega for all the nine subscales used in the  
 29 current study indicating excellent sub-scale quality.

30 **Table 3: KMO values, factor loadings, communalities and McDonald's coefficient**  
 31 **Omega for the study subscales**

| Barrier categories     | Items/questions | KMO | factor loadings | Communalities | Omega |
|------------------------|-----------------|-----|-----------------|---------------|-------|
| Lack of time           | Q15             | 0.6 | 0.8             | 0.7           | 0.9   |
|                        | Q1              |     | 0.8             | 0.6           |       |
|                        | Q8              |     | 0.6             | 0.4           |       |
| Lack of social support | Q16             | 0.5 | 0.7             | 0.5           | 0.9   |
|                        | Q2              |     | 0.7             | 0.5           |       |
|                        | Q9              |     | 0.5             | 0.3           |       |
| Lack of energy         | Q3              | 0.6 | 0.8             | 0.6           | 0.9   |
|                        | Q17             |     | 0.7             | 0.5           |       |
|                        | Q10             |     | 0.6             | 0.3           |       |
| Lack of willpower      | Q18             | 0.6 | 0.8             | 0.7           | 0.9   |
|                        | Q4              |     | 0.7             | 0.6           |       |
|                        | Q11             |     | 0.7             | 0.5           |       |
| Fear of injury         | Q19             | 0.6 | 0.9             | 0.8           | 0.9   |
|                        | Q12             |     | 0.8             | 0.7           |       |
|                        | Q5              |     | 0.8             | 0.6           |       |
| Lack of skills         | Q6              | 0.5 | 0.8             | 0.7           | 0.9   |
|                        | Q13             |     | 0.6             | 0.4           |       |
|                        | Q20             |     | 0.6             | 0.3           |       |
| Lack of resources      | Q7              | 0.7 | 0.8             | 0.7           | 0.9   |
|                        | Q21             |     | 0.8             | 0.7           |       |
|                        | Q14             |     | 0.8             | 0.6           |       |
| Religious barriers     | Q25             | 0.7 | 0.9             | 0.8           | 0.9   |
|                        | Q23             |     | 0.9             | 0.8           |       |
|                        | Q27             |     | 0.8             | 0.6           |       |
| Environmental barriers | Q24             | 0.7 | 0.9             | 0.9           | 0.9   |
|                        | Q26             |     | 0.9             | 0.8           |       |
|                        | Q22             |     | 0.8             | 0.7           |       |

## 32 **DISCUSSION**

33 Despite evidence on the effectiveness of meeting PA levels in the management of T2D,  
 34 and associated cardiovascular risk factors,<sup>67</sup> PA is poorly addressed in routine diabetes  
 35 care.<sup>43</sup> Low PA levels in populations with T2D are consistently reported in western  
 36 countries, for example, USA<sup>44</sup> as well as Arabic speaking countries namely Oman,

1  
2 37 Saudi Arabia and Lebanon.<sup>2 45 46</sup> Addressing perceived barriers to performing  
3  
4 38 recommended PA levels in this population is crucial for planning effective PA  
5  
6 39 promoting interventions.  
7

8  
9 40 Within a series of formative studies to inform a culturally congruent PA intervention in  
10  
11 41 diabetes care,<sup>47</sup> this study has looked at perceived barriers to performing leisure time  
12  
13 42 physical activity in an adult population with T2D attending primary care using an  
14  
15 43 adapted CDC questionnaire translated to Arabic language.<sup>14</sup>  
16

17  
18 44 The current findings relating to willpower, resources and social support were also  
19  
20 45 reported as the top three barriers to PA in the Saudi population attending primary care  
21  
22 46 by AlQuaiz (2009).<sup>14</sup> In the West, USA in particular, the strongest reported barriers to  
23  
24 47 physical activity among adults with T2D were pain (41%), followed by lack of  
25  
26 48 willpower (27%), and poor health (21%).<sup>48</sup>  
27

28  
29  
30 49 In the current study, lack of willpower was significantly highly reported by individuals  
31  
32 50 with low income. This finding is difficult to interpret in the absence of true verifications  
33  
34 51 for the self-reported house hold income. However low income could be linked to  
35  
36 52 financial constrains which were reported to have negative influence on intention to  
37  
38 53 participate in leisure-time physical activity in adult population with T2D in Canada.<sup>49</sup>  
39  
40 54 Additionally in a study in USA, older individuals with low income who were found  
41  
42 55 hopeless and had low participation in social activities had less odds of engaging in PA.<sup>50</sup>  
43  
44 56 None the less, more evidence is needed to explain how income alters the willpower for  
45  
46 57 performing leisure PA in Arabic speaking countries namely Oman. Comparably, Lack  
47  
48 58 of willpower was more likely to be reported by individuals at inactive stages of physical  
49  
50 59 activity (pre-contemplation or contemplation stages of physical activity) than those in  
51  
52 60 active stages. Progressive stages of behavioural change according to the trans-  
53  
54 61 theoretical model were direct correlates to PA in a review article by Trost (2002)<sup>51</sup> and  
55  
56 62 direct determinants in another by Van Stralen (2009).<sup>52</sup> This finding supports the need  
57  
58  
59  
60

18



1  
2 63 for programs to help raise self-willpower/determination through stepped process of  
3  
4 64 behaviour change from inactive (pre-contemplation) to active stages of PA (action and  
5  
6 65 maintenance).<sup>53</sup> Interestingly, fear of injury was the only other reported barrier  
7  
8 66 significantly different between individuals at inactive vs active stages of change in PA.  
9  
10 67 This could be explained by possible physical constraints pertaining to older age<sup>50</sup> and  
11  
12 68 existing comorbidities in the current study population triggering fear of injuries  
13  
14 69 associated with PA.

15  
16  
17  
18 70 Limited resources including high cost and limited facilities for PA have been reported  
19  
20 71 as significant barriers to PA across different cultures.<sup>20 22</sup> In the current study, limited  
21  
22 72 resources were reported as significant by individuals who were married and those with  
23  
24 73 low income. Married individuals could have more financial commitments to their  
25  
26 74 families especially in the Gulf Cooperation Council countries where extended families  
27  
28 75 are common.<sup>54</sup> This may alter an individual's priorities for house-hold income  
29  
30 76 expenditure. Low income was similarly reported as a barrier in a Saudi population,  
31  
32 77 possibly due to the perceived high cost of utilising PA facilities.<sup>14</sup> This may reflect a  
33  
34 78 narrow view on what constitutes PA and a misconception that expensive equipment is  
35  
36 79 required. Hence, irrespective of culture, interventions promoting cost neutral PA such as  
37  
38 80 walking in populations would be highly desirable to overcome this barrier.<sup>47 55</sup>

39  
40  
41  
42 81 Lack of social support was frequently reported by females in this study. Meeting  
43  
44 82 cultural norms and social expectations related to safety, security and conservative dress  
45  
46 83 mainly for females were reported as barriers to PA in South Asian (Pakistani and  
47  
48 84 Indian) British populations<sup>18 21</sup> and populations in Arabic counties such as Qatar.<sup>56</sup>  
49  
50 85 Evaluation of interventions to provide the necessary social support and networks to PA  
51  
52 86 specifically for women with T2D, particularly in the countries of the Gulf Cooperation  
53  
54 87 Council are required. Activities including group-based activities and buddying,<sup>57-59</sup> are  
55  
56 88 worth further investigation.  
57  
58  
59  
60

1  
2 89 Other reported barriers such as fear of injury and lack of skills varied across subgroups  
3  
4 90 in particular, older, unemployed, and uneducated individuals. Older individuals with  
5  
6 91 T2D are more vulnerable to have poor vision and osteoarthritic changes that may cause  
7  
8 92 fall and injuries.<sup>60</sup> Moreover the negative influence of pain to PA in older population  
9  
10 93 with T2D was reported in western countries,<sup>48</sup> and hence potential barriers to  
11  
12 94 individuals' participation. Programs to promote PA should be individualized for type,  
13  
14 95 frequency and intensity of PA and incorporate safety measures to prevent PA induced  
15  
16 96 pain and injuries in older individuals.<sup>61</sup>

17  
18  
19  
20 97 Lack of time on the other hand, has been a highly cited barrier to PA in the general  
21  
22 98 population as well as populations with diabetes.<sup>15-18 21 22 48 62</sup> However, unlike the study  
23  
24 99 by Alquaiz (2009), significant scores for lack of time in this study were higher in males  
25  
26 100 compared to females<sup>14</sup> along-with a lack of energy, which may be a reflection of the fact  
27  
28 101 that more males than females were educated and employed. This perception of 'lack of  
29  
30 102 time', in addition to family and social commitments may jeopardized their time for PA  
31  
32 103 especially if individuals were younger and married. This discussion highlights the  
33  
34 104 importance of changing people's perceptions of PA but also consideration of  
35  
36 105 opportunities in other PA domains namely work and travel that could enable individuals  
37  
38 106 with less leisure time to increase overall PA and behaviour.

39  
40  
41  
42 107 Factors which are independent of an individual's decision-making, such as environment  
43  
44 108 and religion had no significant associations in the current study despite the hot weather  
45  
46 109 during data collection of this study in April/May. These null results, may be real or may  
47  
48 110 be due to the wording of the questions and their interpretation. To address this gap in  
49  
50 111 the literature, a qualitative exploration of possible environmental, including seasonal  
51  
52 112 variations, and religious factors affecting PA performance may be warranted.

53  
54  
55  
56 113 Additionally, results of this study cannot be generalised across all regions in Oman.  
57  
58 114 More information is required from rural Omani communities where perceptions on PA  
59  
60

1  
2 115 may be different. Despite the excellent scale reliability measures in the current data, the  
3  
4 116 results cannot be generalized due to possible differences in scale quality across various  
5  
6 117 data.<sup>42</sup> Despite efforts to minimize potential bias due to the subjective nature of self-  
7  
8 118 reports, accuracy of outcomes cannot be fully ensure.

9  
10  
11 119 Finally, future attempts to explore barriers to PA should equally include work and travel  
12  
13 120 domains to cater diversities in both PA behaviour and sedentary lifestyle across  
14  
15 121 subgroups of adults with T2D.

## 122 **CONCLUSION**

123 This study identified lack of willpower, low resources and low social support  
124 (especially in females) as the most common barriers to performing leisure PA. Physical  
125 activity counselling linked to behaviour change techniques that influence individuals'  
126 readiness to change should be considered for augmenting self-efficacy issues. The  
127 provision of options for PA resources and social support should also be integrated in  
128 intervention design. Due to the range of barriers reported in the current study, PA  
129 counselling should aim to increase individuals' understanding of what constitutes PA  
130 and be flexible and tailored to the specific needs of subgroups of adults with T2D.

## 131 **ETHICAL CONSIDERATION**

132 Ethical approval was obtained from the Regional Research Committee in Muscat, Oman  
133 Ministry of Health. All eligible participants provided informed consent prior to data  
134 collection. For illiterate individuals, consents to participate in this study were provided  
135 by their accompanying support member (spouse, son or daughter).

## 136 **COMPETING INTERESTS**

137 The authors declare that they have no competing interests.

1  
2 138 **FUNDING**  
3

4  
5 139 The Oman Ministry of Health funded this project as part of a PhD grant offered to the  
6  
7 140 corresponding author.  
8  
9

10 141 **AUTHORS' CONTRIBUTION**  
11

12  
13 142 TS is the principal investigator in charge of the project. SM, YA, EB, AC and ASA  
14  
15 143 have all been involved in designing the intervention and the evaluation. TS prepared the  
16  
17 144 initial draft of the manuscript and all other authors have contributed. All authors have  
18  
19 145 critically reviewed and approved the final version of the manuscript.  
20  
21

22  
23 146 **ACKNOWLEDGEMENTS**  
24

25  
26 147 We would like to thank Dr. Ahmed Al-qasmi, Director General of Directorate of  
27  
28 148 Planning and Dr. Fatma Al-ajmi, Director General of Health Services, Muscat in Oman  
29  
30 149 Ministry of Health for their support and constant supervision. Additionally, special  
31  
32 150 thanks to Dr. Adil Al Wahaibi for his assistance with the study statistics.  
33  
34

35  
36 151 **DATA SHARING STATEMENT** No additional data are available.  
37

38  
39 152 **REFERENCES**  
40

- 41  
42 153 1. International Diabetes Federation. IDF DIABETES ATLAS-7TH EDITION  
43  
44 154 Brussels, Belgium; 2015 [Available from: <http://www.diabetesatlas.org>  
45  
46 155 May 2016.  
47 156 2. Al Riyami A, Abd Elaty MA, Morsi M, et al. Oman World Health Survey: Part 1 - methodology,  
48 157 sociodemographic profile and epidemiology of non-communicable diseases in Oman.  
49 158 *Oman Medical Journal* 2012;27(5):425-43.  
50 159 3. World Health Organization. Physical activity  
51  
52 160  
53 161 WHO; 2014 [fact sheet]. Available from:  
54 162 <http://www.who.int/mediacentre/factsheets/fs385/en/> accessed 21st May 2014.  
55 163 4. Badran M, Laher I. Type II Diabetes Mellitus in Arabic-Speaking Countries. *International*  
56 164 *Journal Of Endocrinology* 2012;2012:902873-73. doi: 10.1155/2012/902873  
57 165 5. Oman Health Vision 2050. 2012.  
58  
59  
60

- 1 166 6. American Diabetes Association. Exercise and type 2 diabetes: American College of Sports  
2 167 Medicine and the American Diabetes Association: Joint Position Statement. *Medicine*  
3 168 *and Science in Sports and Exercise* 2010;42(12):2282-303. doi:  
4 169 10.1249/MSS.0b013e3181eeb61c
- 5 170 7. Di Loreto C, Fanelli C, Lucidi P, et al. Make your diabetic patients walk: long-term impact of  
6 171 different amounts of physical activity on type 2 diabetes. *Diabetes care*  
7 172 2005;28(6):1295-302.
- 8 173 8. World Health Organization. WHO's Global Recommendations on PA for Health 2010  
9 174 [Available from:  
10 175 [http://whqlibdoc.who.int/publications/2010/9789241599979\\_eng.pdf](http://whqlibdoc.who.int/publications/2010/9789241599979_eng.pdf).  
11 176
- 12 176 9. Heath GW, Parra DC, Sarmiento OL, et al. Evidence-based intervention in physical activity:  
13 177 lessons from around the world. *Lancet* 2012;380(9838):272-81. doi: 10.1016/S0140-  
14 178 6736(12)60816-2
- 15 179 10. Morrato EH, Hill JO, Wyatt HR, et al. Physical activity in U.S. adults with diabetes and at risk  
16 180 for developing diabetes, 2003. *Diabetes care* 2007;30(2):203-09.
- 17 181 11. Colberg SR, Sigal RJ, Fernhall B, et al. Exercise and type 2 diabetes: The American College of  
18 182 Sports Medicine and the American Diabetes Association: Joint position statement.  
19 183 *Diabetes care* 2010;33(12):e147-e67. doi: 10.2337/dc10-9990
- 20 184 12. Arem H, Moore SC, Patel A, et al. Leisure time physical activity and mortality: a detailed  
21 185 pooled analysis of the dose-response relationship. *JAMA internal medicine*  
22 186 2015;175(6):959-67. doi: 10.1001/jamainternmed.2015.0533 [published Online First:  
23 187 2015/04/07]
- 24 188 13. Hallman DM, Mathiassen SE, Gupta N, et al. Differences between work and leisure in  
25 189 temporal patterns of objectively measured physical activity among blue-collar workers.  
26 190 *BMC Public Health* 2015;15(1):976. doi: 10.1186/s12889-015-2339-4
- 27 191 14. AlQuaiz et al. Barriers to a healthy lifestyle among patients attending primary care clinics at  
28 192 a university hospital in Riyadh. *Annals Of Saudi Medicine* 2009;29(1):30-35.
- 29 193 15. Egan AM, Mahmood WAW, Fenton R, et al. Barriers to exercise in obese patients with type  
30 194 2 diabetes. *QJM: Monthly Journal Of The Association Of Physicians* 2013;106(7):635-  
31 195 38. doi: 10.1093/qjmed/hct075
- 32 196 16. Korkiakangas EE, Alahuhta MA, Husman PM, et al. Motivators and barriers to exercise  
33 197 among adults with a high risk of type 2 diabetes--a qualitative study. *Scandinavian*  
34 198 *Journal Of Caring Sciences* 2011;25(1):62-69. doi: 10.1111/j.1471-6712.2010.00791.x
- 35 199 17. Hume C, Dunstan D, Salmon J, et al. Are barriers to physical activity similar for adults with  
36 200 and without abnormal glucose metabolism? *The Diabetes Educator* 2010;36(3):495-  
37 201 502. doi: 10.1177/0145721710368326
- 38 202 18. Korkiakangas EE, Alahuhta MA, Laitinen JH. Barriers to regular exercise among adults at  
39 203 high risk or diagnosed with type 2 diabetes: a systematic review. *Health Promotion*  
40 204 *International* 2009;24(4):416-27. doi: 10.1093/heapro/dap031
- 41 205 19. Labrunée M, Antoine D, Vergès B, et al. Effects of a home-based rehabilitation program in  
42 206 obese type 2 diabetics. *Annals Of Physical And Rehabilitation Medicine*  
43 207 2012;55(6):415-29. doi: 10.1016/j.rehab.2012.06.001
- 44 208 20. Booth AO, Lewis C, Dean M, et al. Diet and physical activity in the self-management of type  
45 209 2 diabetes: barriers and facilitators identified by patients and health professionals.  
46 210 *Primary Health Care Research & Development* 2013;14(3):293-306. doi:  
47 211 10.1017/S1463423612000412
- 48 212 21. Lawton J, Ahmad N, Hanna L, et al. 'I can't do any serious exercise': barriers to physical  
49 213 activity amongst people of Pakistani and Indian origin with Type 2 diabetes. *Health*  
50 214 *Education Research* 2006;21(1):43-54.
- 51 215 22. Mier N, Medina AA, Ory MG. Mexican Americans with type 2 diabetes: perspectives on  
52 216 definitions, motivators, and programs of physical activity. *Preventing chronic disease*  
53 217 2007;4(2):A24-A24.

- 1  
2 218  
3 219  
4 220  
5 221  
6 222  
7 223  
8 224  
9 225  
10 226  
11 227  
12 228  
13 229  
14 230  
15 231  
16 232  
17 233  
18 234  
19 235  
20 236  
21 237  
22 238  
23 239  
24 240  
25 241  
26 242  
27 243  
28 244  
29 245  
30 246  
31 247  
32 248  
33 249  
34 250  
35 251  
36 252  
37 253  
38 254  
39 255  
40 256  
41 257  
42 258  
43 259  
44 260  
45 261  
46 262  
47 263  
48 264  
49 265  
50 266  
51 267  
52 268  
53 269  
54 270  
55  
56  
57  
58  
59  
60
23. Wanko NS, Brazier CW, Young-Rogers D, et al. Exercise preferences and barriers in urban African Americans with type 2 diabetes. *The Diabetes Educator* 2004;30(3):502-13.
24. Al-Otaibi HH. Measuring stages of change, perceived barriers and self efficacy for physical activity in Saudi Arabia. *Asian Pacific Journal Of Cancer Prevention: APJCP* 2013;14(2):1009-16.
25. Amin TT, Suleman W, Ali A, et al. Pattern, prevalence, and perceived personal barriers toward physical activity among adult Saudis in Al-Hassa, KSA. *Journal Of Physical Activity & Health* 2011;8(6):775-84.
26. Ali HI, Baynouna LM, Bernsen RM. Barriers and facilitators of weight management: perspectives of Arab women at risk for type 2 diabetes. *Health & social care in the community* 2010;18(2):219-28. doi: 10.1111/j.1365-2524.2009.00896.x
27. Berger G, Peerson A. Giving young Emirati women a voice: participatory action research on physical activity. *Health & Place* 2009;15(1):117-24. doi: 10.1016/j.healthplace.2008.03.003
28. Al-Kaabi J, Al-Maskari F, Saadi H, et al. Physical activity and reported barriers to activity among type 2 diabetic patients in the United arab emirates. *The Review Of Diabetic Studies: RDS* 2009;6(4):271-78. doi: 10.1900/RDS.2009.6.271
29. Serour M, Alqhenaei H, Al-Saqabi S, et al. Cultural factors and patients' adherence to lifestyle measures. *The British Journal Of General Practice: The Journal Of The Royal College Of General Practitioners* 2007;57(537):291-95.
30. Alghafri TS, Alharthi SM, Al-Farsi YM, et al. Correlates of physical activity and sitting time in adults with type 2 diabetes attending primary health care in Oman. Under review, 2017.
31. CDC USA. "Overcoming Barriers to Physical Activity": Centers for Disease Control and Prevention; 2011 [Available from: <https://www.cdc.gov/diabetes/ndep/pdfs/8-road-to-health-barriers-quiz-508.pdf> accessed 16 July 2014.
32. Enhancing the QUALity and Transparency Of health Research. The Strengthening the Reporting of Observational Studies in Epidemiology (STROBE) Statement: guidelines for reporting observational studies 2017 [Available from: <http://www.equator-network.org/reporting-guidelines/strobe/> accessed 22 January 2017.
33. Martin SB, Morrow JR, Jr., Jackson AW, et al. Variables related to meeting the CDC/ACSM physical activity guidelines. *Med Sci Sports Exerc* 2000;32(12):2087-92. [published Online First: 2000/12/29]
34. Rik Crutzen & Gjalt-Jorn Ygram Peters. Scale quality: alpha is an inadequate estimate and factor-analytic evidence is needed first of all. *Health Psychology Review* 2015:1-6. doi: 10.1080/17437199.2015.1124240
35. R Development Core Team. 2014 [Available from: <http://r-development-core-team.software.informer.com/>.
36. Thamra S. Correlates of physical activity and sitting time in adults with type 2 diabetes attending primary health centres in Oman, 2015.
37. Heiss V, Petosa R. Correlates of Physical Activity Among Adults With Type 2 Diabetes: A Systematic Literature Review. *American Journal of Health Education* 2014;45(5):278-87. doi: 10.1080/19325037.2014.933139
38. Ministry of Health Oman. World Health Survey Report, Ministry of Health, Oman. In: studies DoRa, ed. Muscat., 2008.
39. Ministry of National Economy Oman. Statistical Yearbook 2011. In: Ministry of National Economy O, Muscat, Oman, ed., 2011.
40. Ministry of Health Oman. Diabetes management guidelines In: centre E, ed. Oman: MOH, 2015.
41. Tobias S, Carlson JE. BRIEF REPORT: BARTLETT'S TEST OF SPHERICITY AND CHANCE FINDINGS IN FACTOR ANALYSIS. *Multivariate Behavioral Research* 1969;4(3):375-77. doi: 10.1207/s15327906mbr0403\_8



- 1 271 42. Dunn TJ, Baguley T, Brunsden V. From alpha to omega: a practical solution to the pervasive  
2 272 problem of internal consistency estimation. *British journal of psychology (London,*  
3 273 *England : 1953)* 2014;105(3):399-412. doi: 10.1111/bjop.12046 [published Online First:  
4 274 2014/05/23]
- 5 275 43. Matthews L, Kirk A, MacMillan F, et al. Can physical activity interventions for adults with  
6 276 type 2 diabetes be translated into practice settings? A systematic review using the RE-  
7 277 AIM framework. *Translational Behavioral Medicine* 2014;4(1):60-78.
- 8 278 44. Morratto EH, Hill JO, Wyatt HR, et al. Physical activity in U.S. adults with diabetes and at risk  
9 279 for developing diabetes, 2003. *Diabetes care* 2007;30(2):203-9. doi: 10.2337/dc06-  
10 280 1128 [published Online First: 2007/01/30]
- 11 281 45. Al-Nozha MM, Al-Hazzaa HM, Arafah MR, et al. Prevalence of physical activity and inactivity  
12 282 among Saudis aged 30-70 years. A population-based cross-sectional study. *Saudi*  
13 283 *medical journal* 2007;28(4):559-68. [published Online First: 2007/04/26]
- 14 284 46. Sibai AM, Costanian C, Tohme R, et al. Physical activity in adults with and without diabetes:  
15 285 from the 'high-risk' approach to the 'population-based' approach of prevention. *BMC*  
16 286 *Public Health* 2013;13:1002-02. doi: 10.1186/1471-2458-13-1002
- 17 287 47. Alghafri TS, Alharthi SM, Al-Farsi YM, et al. Study protocol for "MOVEdiabetes": a trial to  
18 288 promote physical activity for adults with type 2 diabetes in primary health care in  
19 289 Oman. *BMC Public Health* 2017;17(1):28. doi: 10.1186/s12889-016-3990-0 [published  
20 290 Online First: 2017/01/07]
- 21 291 48. Thomas N, Alder E, Leese GP. Barriers to physical activity in patients with diabetes.  
22 292 *Postgraduate Medical Journal* 2004;80(943):287-91.
- 23 293 49. Boudreau F, Godin G. Understanding physical activity intentions among French Canadians  
24 294 with type 2 diabetes: an extension of Ajzen's theory of planned behaviour. *The*  
25 295 *International Journal of Behavioral Nutrition and Physical Activity* 2009;6:35-35. doi:  
26 296 10.1186/1479-5868-6-35
- 27 297 50. Plow MA, Allen SM, Resnik L. Correlates of Physical Activity Among Low-Income Older  
28 298 Adults. *Journal of Applied Gerontology* 2011;30(5):629-42. doi:  
29 299 doi:10.1177/0733464810375685
- 30 300 51. Trost SG, Owen N, Bauman AE, et al. Correlates of adults' participation in physical activity:  
31 301 review and update. *Medicine And Science In Sports And Exercise* 2002;34(12):1996-  
32 302 2001.
- 33 303 52. van Stralen MM, De Vries H, Mudde AN, et al. Determinants of initiation and maintenance  
34 304 of physical activity among older adults: a literature review. *Health Psychology Review*  
35 305 2009;3(2):147-207. doi: 10.1080/17437190903229462
- 36 306 53. Kirk A, MacMillan F, Webster N. Application of the Transtheoretical model to physical  
37 307 activity in older adults with Type 2 diabetes and/or cardiovascular disease. *Psychology*  
38 308 *of Sport and Exercise* 2010;11(4):320-24. doi:  
39 309 <http://dx.doi.org/10.1016/j.psychsport.2010.03.001>
- 40 310 54. GCC statistical center. GCC-statistics 2010 [Available from: [https://gccstat.org/en/terms-of-](https://gccstat.org/en/terms-of-use13/10/2016)  
41 311 [use13/10/2016](https://gccstat.org/en/terms-of-use13/10/2016)].
- 42 312 55. Bird EL, Baker G, Mutrie N, et al. Behavior change techniques used to promote walking and  
43 313 cycling: a systematic review. *Health Psychol* 2013;32(8):829-38. doi:  
44 314 10.1037/a0032078 [published Online First: 2013/03/13]
- 45 315 56. Donnelly TT, Al Suwaidi J, Al Enazi NR, et al. Qatari women living with cardiovascular  
46 316 diseases-challenges and opportunities to engage in healthy lifestyles. *Health Care For*  
47 317 *Women International* 2012;33(12):1114-34. doi: 10.1080/07399332.2012.712172
- 48 318 57. Bastiaens H, Sunaert P, Wens J, et al. Supporting diabetes self-management in primary  
49 319 care: pilot-study of a group-based programme focusing on diet and exercise. *Primary*  
50 320 *Care Diabetes* 2009;3(2):103-09. doi: 10.1016/j.pcd.2009.02.001
- 51 321 58. Matthews L. The feasibility, effectiveness and implementation of a physical activity  
52 322 consultation service for adults within routine diabetes care. [Implementation of

- 1  
2 323 physical activity services for the management of adults with Type 2 Diabetes].  
3 324 University of Strathclyde School of Psychological Sciences and Health, 2013.
- 4 325 59. Barrera M, Strycker LA, Mackinnon DP, et al. Social-ecological resources as mediators of  
5 326 two-year diet and physical activity outcomes in type 2 diabetes patients. *Health*  
6 327 *Psychology: Official Journal Of The Division Of Health Psychology, American*  
7 328 *Psychological Association* 2008;27(2 Suppl):S118-S25. doi: 10.1037/0278-  
8 329 6133.27.2(Suppl.).S118
- 9 330 60. Alberti KGMM, Zimmet PZ. Definition, diagnosis and classification of diabetes mellitus and  
10 331 its complications. Part 1: diagnosis and classification of diabetes mellitus. Provisional  
11 332 report of a WHO Consultation. *Diabet Med* 1998;15(7):539-53. doi:  
12 333 10.1002/(SICI)1096-9136(199807)15:7<539::AID-DIA668>3.0.CO;2-S
- 13 334 61. Borschmann K, Moore K, Russell M, et al. Overcoming barriers to physical activity among  
14 335 culturally and linguistically diverse older adults: a randomised controlled trial.  
15 336 *Australasian Journal On Ageing* 2010;29(2):77-80. doi: 10.1111/j.1741-  
16 337 6612.2009.00390.x
- 17 338 62. Donahue KE, Mielenz TJ, Sloane PD, et al. Identifying supports and barriers to physical  
18 339 activity in patients at risk for diabetes. *Preventing chronic disease* 2006;3(4):A119-A19.

20  
21 340  
22  
23

24 341 **Figure 1: Box and Whisker plots for the reported barrier sum scores of 0-9 (high**  
25  
26 **scores defined as  $\geq 5$ )**  
27  
28

29  
30 343 **Figure 2: Percentage of reported high barrier scores ( $\geq 5$ )**  
31  
32  
33  
34  
35  
36  
37  
38  
39  
40  
41  
42  
43  
44  
45  
46  
47  
48  
49  
50  
51  
52  
53  
54  
55  
56  
57  
58  
59  
60



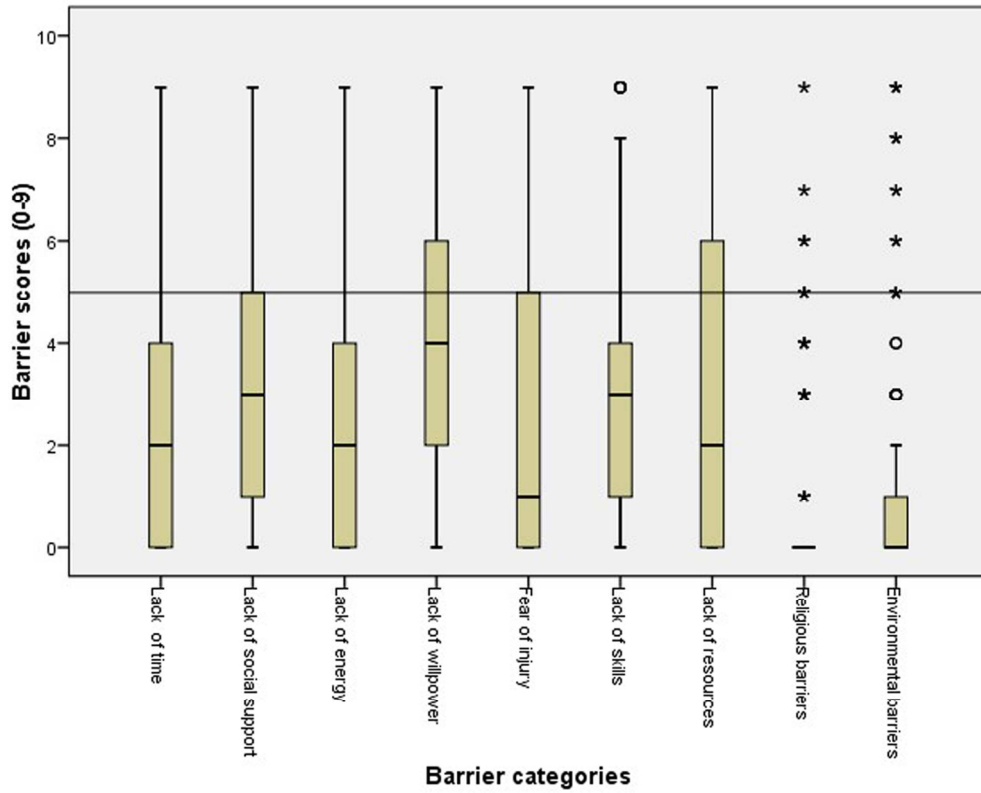

Figure 1: Box and Whisker plots for the reported barrier sum scores of 0-9 (high scores defined as  $\geq 5$ )

132x106mm (300 x 300 DPI)

For peer review only

1  
2  
3  
4  
5  
6  
7  
8  
9  
10  
11  
12  
13  
14  
15  
16  
17  
18  
19  
20  
21  
22  
23  
24  
25  
26  
27  
28  
29  
30  
31  
32  
33  
34  
35  
36  
37  
38  
39  
40  
41  
42  
43  
44  
45  
46  
47  
48  
49  
50  
51  
52  
53  
54  
55  
56  
57  
58  
59  
60

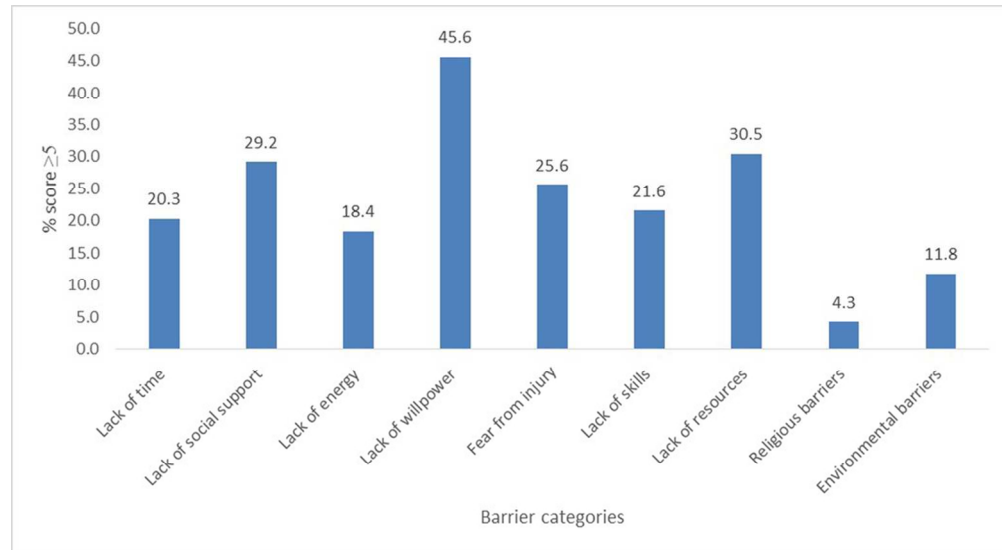

Figure 2: Percentage of reported high barrier scores ( $\geq 5$ )

96x53mm (300 x 300 DPI)

review only

STROBE Statement—checklist of items that should be included in reports of observational studies

|                           | Item No | Page number (where information can be found in the manuscript) |
|---------------------------|---------|----------------------------------------------------------------|
| Title and abstract        | 1       | 1 & 2-3                                                        |
| <b>Introduction</b>       |         |                                                                |
| Background/rationale      | 2       | 4                                                              |
| Objectives                | 3       | 5                                                              |
| <b>Methods</b>            |         |                                                                |
| Study design              | 4       | 5                                                              |
| Setting                   | 5       | 6                                                              |
| Participants              | 6       | 6                                                              |
|                           |         |                                                                |
| Variables                 | 7       | 6                                                              |
| Data sources/ measurement | 8       | 6                                                              |
| Bias                      | 9       | 7                                                              |
| Study size                | 10      | 8                                                              |
| Quantitative variables    | 11      | 8                                                              |
| Participants              | 13      | 8                                                              |
| <b>Results</b>            |         |                                                                |
| Descriptive data          | 14      | 8-9                                                            |
| Outcome data              | 15      | 10-14                                                          |
| Main results              | 16      | 14-15                                                          |
| Other analyses            | 17      | 15                                                             |
| <b>Discussion</b>         |         |                                                                |
| Key results               | 18      | 16-18                                                          |
| Limitations               | 19      | 19                                                             |
| Interpretation            | 20      | 19                                                             |
| Generalisability          | 21      | 19                                                             |
| <b>Other information</b>  |         |                                                                |
| Funding                   | 22      | 20                                                             |

# BMJ Open

## Perceived barriers to leisure time physical activity in adults with type 2 diabetes attending primary health care in Oman: a cross-sectional survey

|                                 |                                                                                                                                                                                                                                                                                                                                                                                                                                                                                                                                                                                       |
|---------------------------------|---------------------------------------------------------------------------------------------------------------------------------------------------------------------------------------------------------------------------------------------------------------------------------------------------------------------------------------------------------------------------------------------------------------------------------------------------------------------------------------------------------------------------------------------------------------------------------------|
| Journal:                        | <i>BMJ Open</i>                                                                                                                                                                                                                                                                                                                                                                                                                                                                                                                                                                       |
| Manuscript ID                   | bmjopen-2017-016946.R2                                                                                                                                                                                                                                                                                                                                                                                                                                                                                                                                                                |
| Article Type:                   | Research                                                                                                                                                                                                                                                                                                                                                                                                                                                                                                                                                                              |
| Date Submitted by the Author:   | 20-Jul-2017                                                                                                                                                                                                                                                                                                                                                                                                                                                                                                                                                                           |
| Complete List of Authors:       | Alghafri, Thamra; Ministry of Health, Planning<br>Alharthi, Saud; Ministry of Health, Medicine<br>Al-Farsi, Yahya; Sultan Qaboos University College of Medicine and Health Science, FAMCO<br>Bannerman, Elaine; Ninewells Hospital and Medical School., Centre for Public Health Nutrition Research, University of Dundee<br>Craigie, Angela; Centre for Research into Cancer Prevention and Screening, Medical Research Institute, University of Dundee<br>Anderson, Annie; Ninewells Hospital and Medical School, Centre for Public Health Nutrition Research, University of Dundee |
| <b>Primary Subject Heading</b>: | Diabetes and endocrinology                                                                                                                                                                                                                                                                                                                                                                                                                                                                                                                                                            |
| Secondary Subject Heading:      | Sports and exercise medicine                                                                                                                                                                                                                                                                                                                                                                                                                                                                                                                                                          |
| Keywords:                       | Physical Activity, Type 2 diabetes, Primary health care, Barriers, Oman, General diabetes < DIABETES & ENDOCRINOLOGY, PUBLIC HEALTH, SPORTS MEDICINE                                                                                                                                                                                                                                                                                                                                                                                                                                  |
|                                 |                                                                                                                                                                                                                                                                                                                                                                                                                                                                                                                                                                                       |

SCHOLARONE™  
Manuscripts

1 **Perceived barriers to leisure time physical activity in adults with type 2 diabetes**  
2 **attending primary health care in Oman: a cross-sectional survey**

3 **Thamra S Alghafri<sup>1\*</sup>, Saud M Alharthi<sup>1</sup>, Yahya Al-farsi<sup>2</sup>, Elaine Bannerman<sup>3</sup>, Angela M**  
4 **Craigie<sup>3</sup>, Annie S Anderson<sup>3</sup>**

5 <sup>1</sup>Directorate General of Health Services, Ministry of Health, Muscat, Oman.

6 <sup>2</sup>Department of Family Medicine and Public Health, College of Medicine and Health  
7 Sciences, Sultan Qaboos University, Oman.

8 <sup>3</sup>Centre for Public Health Nutrition Research, University of Dundee, Ninewells Hospital  
9 and Medical School.

10 \*Corresponding author: Thamra S Alghafri (TSA) PO Box 2723, Postal Code 112,  
11 Oman, email: [tsalghafri@dundee.ac.uk](mailto:tsalghafri@dundee.ac.uk), Telephone number 0096899376455

12 Email addresses:

13 Saud M Alharthi (SMA): [smsbar07@gmail.com](mailto:smsbar07@gmail.com)

14 Yahya Al-farsi (YMF): [ymfarsi@gmail.com](mailto:ymfarsi@gmail.com)

15 Elaine Bannerman (EB): [e.bannerman@dundee.ac.uk](mailto:e.bannerman@dundee.ac.uk)

16 Angela M. Craigie (AMC): [a.craigie@dundee.ac.uk](mailto:a.craigie@dundee.ac.uk)

17 Annie S Anderson (ASA): [a.s.anderson@dundee.ac.uk](mailto:a.s.anderson@dundee.ac.uk)

18 **WORD COUNT:** 4272

19 **COPYRIGHT:** The Corresponding Author has the right to grant on behalf of all  
20 authors and does grant on behalf of all authors, an exclusive licence on a worldwide  
21 basis to the BMJ Publishing Group Ltd to permit this article (if accepted) to be  
22 published in BMJ editions and any other BMJ PGL products and sublicences such use  
23 and exploit all subsidiary rights, as set out in our licence.

1  
2  
3  
4  
5  
6  
7  
8  
9  
10  
11  
12  
13  
14  
15  
16  
17  
18  
19  
20  
21  
22  
23  
24  
25  
26  
27  
28  
29  
30  
31  
32

**TRANSPARENCY DECLARATION:** This manuscript is an honest, accurate, and transparent account of the study being reported. There are no important aspects of the study that are omitted; and any possible discrepancies from the study are explained.

**TECHNICAL APPENDIX:** Data generated from this study is not available for public use. However it is available from the corresponding author on reasonable request and approvals from Oman Ministry of Health.

**FUNDING:** The Oman Ministry of Health funded this project.

**CONFLICTS OF INTEREST:** No competing interests.

peer review only

33 **ABSTRACT**

34 **Objectives:** Physical activity is fundamental in diabetes management for good  
35 metabolic control. This study aimed to identify barriers to performing leisure time  
36 physical activity and explore differences based on gender, age, marital status,  
37 employment, education, income and perceived stages of change in physical activity in  
38 adults with type 2 diabetes in Oman.

39 **Design:** Cross-sectional study using an Arabic version of the “Barriers to Being Active”  
40 27 item questionnaire.

41 **Setting:** Seventeen primary health centres randomly selected in Muscat.

42 **Participants:** Individuals >18 years with type 2 diabetes, attending diabetes clinic for >  
43 2 years and with no contraindications to performing physical activity.

44 **Primary and secondary outcome measures:**

45 Participants were asked to rate how far different factors influenced their physical  
46 activity, under the following categories: fear of injury, lack of time, social support,  
47 energy, willpower, skills, resources, religion and environment. On a scale of 0-9,  
48 barriers were considered important if scored  $\geq 5$ .

49 **Results:** A total of 305 questionnaires were collected. Most (96%) reported at least one  
50 barrier to performing leisure time physical activity. Lack of willpower (44.4%), lack of  
51 resources (30.5%) and lack of social support (29.2%) were the most frequently reported  
52 barriers. Using chi-square test, lack of willpower was significantly different in  
53 individuals with low vs high income (54.2% vs 40%,  $P=0.002$ ) and in those reporting  
54 inactive vs active stages of change for physical activity (50.7% vs 34.7%,  $P=0.029$ ),  
55 lack of resources was significantly different in those with low vs high income (40% vs

1  
2  
3  
4  
5  
6  
7  
8  
9  
10  
11  
12  
13  
14  
15  
16  
17  
18  
19  
20  
21  
22  
23  
24  
25  
26  
27  
28  
29  
30  
31  
32  
33  
34  
35  
36  
37  
38  
39  
40  
41  
42  
43  
44  
45  
46  
47  
48  
49  
50  
51  
52  
53  
54  
55  
56  
57  
58  
59  
60

24.3%,  $P=0.004$ ) and married vs unmarried (33.8% vs 18.5%,  $P=0.018$ ). Lack of social support was significant in females vs males (35.4% vs 20.8%,  $P=0.005$ ).

**Conclusions:** The findings can inform the design on physical activity intervention studies by testing the impact of cost neutral programs on improving barriers to physical activity including approaches that enhance self-efficacy and social support.

**Key words:** Physical Activity, Type 2 diabetes, Primary health care, Barriers, Oman

## ARTICLE SUMMARY

### Strengths and limitations of this study

- Barriers to performing leisure physical activity for adults with type 2 diabetes were investigated in Oman where prevalence of both diabetes and physical inactivity is high.
- Questions on possible barriers to performing physical activity linked to religion and environment were included.
- The tool used in this study was an English to Arabic language translated questionnaire that may have affected the validity of questions.
- Due to the cross-sectional nature of this study, causative inferences cannot be made.

## INTRODUCTION

Oman is located in Southwest Asia on the Southeast coast of the Arabian Peninsula. Similar to its neighbouring countries (United Arab Emirates, Saudi Arabia, Qatar, Bahrain, and Kuwait), Oman has witnessed enormous economic advancement in recent decades, along with significant increases in non-communicable diseases including a rising prevalence of diabetes. Diabetes prevalence in Oman has increased from 8.3% in 1991 to 12.3% in 2008 and recent estimates are in the order of 14.8%, exceeding global rates.<sup>1 2</sup> The World Health Organization (WHO) has indicated that physical inactivity is one of the top ten leading global causes of mortality and disability worldwide, and the



1  
2  
3  
4  
5  
6  
7  
8  
9  
10  
11  
12  
13  
14  
15  
16  
17  
18  
19  
20  
21  
22  
23  
24  
25  
26  
27  
28  
29  
30  
31  
32  
33  
34  
35  
36  
37  
38  
39  
40  
41  
42  
43  
44  
45  
46  
47  
48  
49  
50  
51  
52  
53  
54  
55  
56  
57  
58  
59  
60

81 principal cause for approximately 27% of diabetes, and approximately 30% of ischemic  
82 heart disease.<sup>3</sup> In Oman, it has been reported that almost 70% of the population are  
83 physically inactive (daily activity of  $\leq 10$  minutes).<sup>4</sup> This raises concerns regarding the  
84 impact these high levels of physical inactivity may be having on lifestyle related chronic  
85 diseases including diabetes, on health care expenditures and overall population health.<sup>5</sup>

86 The protective effects of physical activity (PA) in the management of diabetes,  
87 specifically type 2 diabetes (T2D), have been widely reported.<sup>6 7</sup> WHO recommends at  
88 least 150 minutes of moderate to vigorous physical activity or 75 minutes of vigorous  
89 PA/week.<sup>8</sup> However, over 60% of patients with diabetes in western countries do not  
90 meet the recommended levels of PA.<sup>9 10</sup> The Oman World Health Survey (OWHS)  
91 2008, reported that in Oman, only 15% of patients with diabetes (98% of them with type  
92 2 diabetes) met PA recommendations using the Global Physical Activity Questionnaire  
93 (GPAQ).<sup>2</sup>

94 The importance of leisure time PA in meeting PA recommendations is consistently<sup>11</sup>  
95 associated with reduced mortality risks (20% to >37% risk reduction) and favourable  
96 cardiovascular outcomes.<sup>12</sup> This relationship appears to have a dose-response effect  
97 where the upper threshold for mortality benefit occurs at 3 to 5 times the leisure PA  
98 recommendations of 7.5-<15 MET h/wk.<sup>12</sup> No clear association is observed for  
99 occupational or travel physical activity.<sup>13</sup>

100 Theoretical models underpinning effective interventions to promote personalized PA  
101 (contents, methods and approaches) should focus on benefits and ways to overcome  
102 barriers to PA.<sup>14</sup> Literature to date mainly from western countries has reported a number  
103 of potential barriers to performing PA in adults with diabetes. These include lack of  
104 time,<sup>15-18</sup> physical constraints including pain,<sup>19</sup> lack of knowledge and limited facilities.<sup>20</sup>  
105 Differences in reporting barriers to PA have been noted across genders, age groups,  
106 environments, cultures and disease status. Female gender, increasing age, unsafe

1  
2  
3  
4  
5  
6  
7  
8  
9  
10  
11  
12  
13  
14  
15  
16  
17  
18  
19  
20  
21  
22  
23  
24  
25  
26  
27  
28  
29  
30  
31  
32  
33  
34  
35  
36  
37  
38  
39  
40  
41  
42  
43  
44  
45  
46  
47  
48  
49  
50  
51  
52  
53  
54  
55  
56  
57  
58  
59  
60

107 neighbourhoods, being overweight and being a smoker increased the odds of reporting  
108 barriers to PA among migrant populations like African Americans, South Asian British  
109 and Mexican Americans.<sup>21-23</sup> In the Arab countries, modest evidence on barriers to PA  
110 in both the general population and in adults with T2D suggests that lack of time, co-  
111 existing diseases and adverse weather conditions<sup>14 24-29</sup> are the main factors. Moreover,  
112 the climate in this region may be a drawback to meeting recommended levels of PA due  
113 to high temperatures during the day, particularly in the sandy/desert areas. During the  
114 summer months, these countries including Oman experience major heat waves (>40  
115 degrees celsius) and humidity levels that could reach 90%.

116 The current study aimed to identify barriers to performing leisure-time PA in adults  
117 with T2D in Oman, and the distribution of barrier scores across different socio-  
118 demographic characteristics and perceived stages of change in PA.

## 119 **METHODS**

### 120 **Study design, setting and participants**

121 This cross-sectional interview based study was part of a larger study that examined  
122 correlates of physical activity and sitting time in adults with type 2 diabetes, and  
123 barriers to leisure physical activity in the same population. Results regarding the PA  
124 patterns of the population using the Global Physical Activity Questionnaire are  
125 reported elsewhere.<sup>30</sup> This current paper identified barriers to performing leisure  
126 physical activity expressed by Omani adults with T2D using adapted questions from the  
127 Centers for Disease Control and Prevention (CDC) questionnaire<sup>31</sup> conducted in April/  
128 May 2015 in Muscat (Urban communities). Reporting of this study follows the  
129 guidelines for strengthening the reporting of observational studies in epidemiology  
130 (STROBE).<sup>32</sup>

1  
2  
3  
4  
5  
6  
7  
8  
9  
10  
11  
12  
13  
14  
15  
16  
17  
18  
19  
20  
21  
22  
23  
24  
25  
26  
27  
28  
29  
30  
31  
32  
33  
34  
35  
36  
37  
38  
39  
40  
41  
42  
43  
44  
45  
46  
47  
48  
49  
50  
51  
52  
53  
54  
55  
56  
57  
58  
59  
60

131 All patients with T2D attending their routine diabetes clinics in 17 randomly selected  
132 primary health care centres in Muscat were approached to take part in the study.  
133 Inclusion criteria were age >18 years and being followed up in a diabetes clinic for >2  
134 years and ability to provide informed consent. For illiterate participants, informed  
135 consents were taken from their spouse, son, daughter or other close family member.  
136 Participants with type 1 diabetes, newly diagnosed (<6 months) or who had difficulty in  
137 performing any physical activity, including history of myocardial infarction of <6  
138 months and multiple organ failure, were excluded.

### 139 **Data sources/ measurement**

140 In addition to recording physiological data [Body Mass Index (BMI), medication,  
141 duration of diabetes, blood pressure (BP), lipid profile, and comorbidities coinciding  
142 with diabetes] from the electronic health system, a multi-section questionnaire with a  
143 range of answers in closed format was administered by a trained interviewer. The  
144 following information was collected:

145 *Socio-demographic data:* included gender, age, marital status, education, household  
146 income, and employment.

147 *Perceptions on stage of change in physical activity:* Based on the trans-theoretical  
148 theory of behaviour change,<sup>33</sup> subjects were asked to identify their perceived stage of  
149 change in physical activity. Participants were to select “Maintenance stage” if they were  
150 participating in moderate physical activity five or more times per week or in vigorous  
151 activity three to five times per week longer than six consecutive months or select  
152 “Action stage” if less than six months. “Preparation stage” was selected by subjects who  
153 were thinking about starting exercise such as walking in the near future, or doing  
154 vigorous activity less than three times per week, or moderate activity less than five  
155 times per week. Contemplation stage “getting ready” was selected by subjects who were

1  
2  
3  
4  
5  
6  
7  
8  
9  
10  
11  
12  
13  
14  
15  
16  
17  
18  
19  
20  
21  
22  
23  
24  
25  
26  
27  
28  
29  
30  
31  
32  
33  
34  
35  
36  
37  
38  
39  
40  
41  
42  
43  
44  
45  
46  
47  
48  
49  
50  
51  
52  
53  
54  
55  
56  
57  
58  
59  
60

156 thinking about starting exercise or walk in the next six months. Subjects who were not  
157 thinking about starting any PA in the near future selected pre-contemplation stage “not  
158 ready”.

159 *CDC questionnaire on barriers to leisure PA:*

160 An English to Arabic translated CDC questionnaire “Barriers to Being Active” was  
161 used in a study in Saudi Arabia<sup>14</sup> with 21 questions on seven barriers (lack of time, lack  
162 of social support, lack of energy, lack of willpower, fear of injury, lack of skill and lack  
163 of resources). Permission to use the questionnaire was obtained from the lead author on  
164 November 24, 2014  
165 (<https://www.ncbi.nlm.nih.gov/pmc/articles/PMC2813614/figure/F0001/>). However, in  
166 that tool no statements on religion or environment as possible barriers to PA were  
167 included. To address this gap and to formulate robust items on these topics we  
168 undertook several procedures. Literature search was conducted to identify possible  
169 content for the new items from similar studies in neighbour countries with similar socio-  
170 economical characteristics.<sup>28 29</sup> Potential religious barriers considered questions on  
171 religious beliefs restricting PA, accepted clothing for PA and religious perceptions on  
172 PA.<sup>14 25 26</sup> Potential environmental barriers included questions on extreme weather  
173 conditions, physical activity in summer time and availability of appropriate environment  
174 for PA.<sup>16 25</sup> Content and face validity of the questionnaire were assessed by our  
175 investigatory team and draft questions were then discussed with a sample of patients  
176 prior to field testing and adjustments were made to ease comprehension and ensure  
177 translation to Arabic was appropriate.

178 A set of three related questions (total of 27 questions) presented in random order within  
179 the questionnaire represented one barrier category. A scoring system<sup>31</sup> was used to  
180 indicate how likely each statement/item was considered to be a barrier (very likely=3,  
181 somewhat likely=2, somewhat unlikely=1, very unlikely=0). Scores of the three theme-

1  
2  
3  
4  
5  
6  
7  
8  
9  
10  
11  
12  
13  
14  
15  
16  
17  
18  
19  
20  
21  
22  
23  
24  
25  
26  
27  
28  
29  
30  
31  
32  
33  
34  
35  
36  
37  
38  
39  
40  
41  
42  
43  
44  
45  
46  
47  
48  
49  
50  
51  
52  
53  
54  
55  
56  
57  
58  
59  
60

182 related questions were added up to provide a total for each category of barriers. Possible  
183 scores for each barrier category ranged from 0-9. A score of  $\geq 5$  was considered as an  
184 important barrier to overcome.<sup>31</sup> A copy of the used (Arabic) questionnaire can be found  
185 in online supplementary material (5).

186 To ensure common understanding and acceptability, an interview recording was  
187 undertaken in Muscat in 25 randomly selected adult with type 2 diabetes (population of  
188 interest) outside the sampled health centres of the study. Results were discussed and  
189 reviewed by the investigation team and an independent statistician.

190 Based on the data from the current study, the scale quality (27 item study questionnaire)  
191 including internal consistency reliability measures were investigated through the use of  
192 factor analysis using SPSS v22 and supported by McDonald's coefficient omega using  
193 the free and open source R.<sup>34 35</sup>

#### 194 **Study size**

195 Power analysis was performed to estimate the prevalence of meeting PA  
196 recommendations in adult population with T2D in a parallel study conducted in the  
197 same population.<sup>36</sup> We assumed that meeting PA recommendation is at least in part  
198 facilitated by reporting fewer barriers to PA<sup>37</sup> and used an estimated 15% prevalence of  
199 adequate PA in patients with diabetes, as reported in the 2008 Oman World Health  
200 Survey (OWHS).<sup>38</sup> Using 95% confidence limits, a response rate of 80%, and a  
201 precision of +/-4%, and smallest expected frequency of 15%, the calculated sample size  
202 was ~300 participants across primary health centres in Muscat region, the capital of  
203 Oman.

1  
2  
3  
4  
5  
6  
7  
8  
9  
10  
11  
12  
13  
14  
15  
16  
17  
18  
19  
20  
21  
22  
23  
24  
25  
26  
27  
28  
29  
30  
31  
32  
33  
34  
35  
36  
37  
38  
39  
40  
41  
42  
43  
44  
45  
46  
47  
48  
49  
50  
51  
52  
53  
54  
55  
56  
57  
58  
59  
60

204 **Training**

205 A multidisciplinary team of two nurses, one senior dietician, one medical orderly and  
206 two doctors were recruited for data collection. A one day training on administration of  
207 the questionnaire was delivered by the national focal point on PA in Oman Ministry of  
208 Health. Data entry, cross-checking and cleaning was done through Epi Info™ 7 by an  
209 independent personnel. Entered data was transferred to SPSS v22 for analysis and  
210 subsequent results.

211 **Statistical methods**

212 Descriptive statistics were expressed as percentages and mean (SD), median (quartiles)  
213 to describe the study sample characteristics. Sum of scores from the three related  
214 questions per category (range from 0-9) were expressed as median (LQ, UQ).  
215 Correlations between the sum of scores of the nine barrier categories were tested.  
216 Furthermore, data were dichotomised to scores  $<5$  and  $\geq 5$  to determine the highly  
217 reported barriers as advised in the CDC questionnaire and practised in a study in Saudi  
218 Arabia.<sup>31</sup> Chi-square analysis was carried out to identify with the distribution of the  
219 high barrier scores ( $\geq 5$ ) across the independent sociodemographic factors including  
220 gender (male vs female); age (to ensure sufficient power and adequate numbers for  
221 further statistical analysis the population was divided by the mean age  $\leq 57$  vs  $< 57$   
222 years); marital status (currently unmarried vs married); education (those unable to read  
223 or write (“uneducated”) vs. those having attended primary school or beyond  
224 (“educated”); household income ( $<500$  vs  $\geq 500$  Omani rials - ‘OR’); and employment  
225 (unemployed, including those retired vs employed). Self-reported stage of change in PA  
226 was expressed as one of two categories: inactive if reporting “pre-contemplation” or  
227 “contemplation” and potentially active if reporting being at “preparation”, “action”, or

1  
2 228 “maintenance” stages of PA. Corrected P-values (Yate’s continuity) were reported for  
3  
4 229 high barrier scores against the studied independent variables.

5  
6 230 Factor analysis namely principal components analysis (PCA) was performed to identify  
7  
8 231 composite scores for the components underlying the items/questions in the study scale.  
9  
10 232 Eigenvalues values of  $\geq 1.0$  were used to determine the number of components in the  
11  
12 233 overall factor analysis which are considered statistically sound.<sup>39</sup> Furthermore, factor  
13  
14 234 loading matrix was examined using Oblimin rotation<sup>40</sup> where correlations between the  
15  
16 235 extracted components were obtained.  
17  
18  
19

## 20 21 236 **RESULTS**

### 22 23 24 237 **Socio-demographic**

25  
26  
27 238 Out of 312 patients approached, 305 (98%) completed the questionnaire. Slightly more  
28  
29 239 females were represented in this sample (57.4%) than males. The population was  
30  
31 240 slightly older with mean (SD) age of 57(10.8) years. Additionally, more than two-thirds  
32  
33 241 being married (78.8%) and just about half unable to read or write (48.9%). More than a  
34  
35 242 third of the study population (39.3%) reported household income of <500 OR (less than  
36  
37 243 national average)<sup>41</sup> and the majority (77%) reported unemployment (including  
38  
39 244 retirement). More males than females were educated (70% vs 37%) and employed (45%  
40  
41 vs 7%) (Table 1).  
42  
43  
44

### 45 246 **Physiological status**

46  
47 247 Median (LQ, UQ) duration of diabetes in this population was 6.0 (4.0, 10.0) years. The  
48  
49 248 majority of the participants had hypertension (n=217, 71%) or/and hyperlipidaemia  
50  
51 249 (n=189, 62%) coinciding with their diabetes. All of them were using anti-hypertensive  
52  
53 250 or/and lipid lowering medications as appropriate. More than three-quarters of those  
54  
55 251 taking anti-hypertensives (78%) and two-thirds of those using lipid lowering drugs  
56  
57  
58  
59  
60

252 (66%) had blood pressure (BP) readings and fasting serum cholesterol within target  
 253 levels (BP<140/80 mmHg and fasting serum cholesterol of <5mmol/l).<sup>42</sup> Fifteen percent  
 254 (n=45) were controlling their diabetes by diet alone versus 85% (n=260) on oral anti-  
 255 hypoglycaemic medications, in which 25% (n=75) were additionally on insulin. Mean  
 256 (SD) BMI was 31.0 (6.0) kg/m<sup>2</sup> where 89% (n=271) had BMI >25kg/m<sup>2</sup> in which 50%  
 257 (n=153) were obese (BMI>30 kg/m<sup>2</sup>) and 39% (n=118) were overweight (BMI>25-  
 258 29.99 kg/m<sup>2</sup>). Glycated haemoglobin HbA1c was >7% (>48 mmol/mol) in more than  
 259 half of the population (58%) indicating poor diabetes control (Table 1).

### 260 Self-reported stages of PA

261 Only 17% (n=52) of participants considered themselves actively participating in regular  
 262 moderate or vigorous PA (22% of males vs 13% of females). Of the remainder, the  
 263 majority reported being “not ready” (37%), “getting ready” (31%) or in “preparation”  
 264 (15%) (Table 1).

265 **Table 1: Selected participants characteristics**

| Population characteristics | Total population<br>n=305(100%) |
|----------------------------|---------------------------------|
| <b>Gender</b>              |                                 |
| Male                       | 130(42.6)                       |
| Female                     | 175(57.4)                       |
| <b>Age (years)</b>         |                                 |
| ≤57                        | 155(51)                         |
| >57                        | 150(49)                         |
| <b>Marital status</b>      |                                 |
| Currently unmarried        | 65(21)                          |
| Currently married          | 240(79)                         |
| <b>Education</b>           |                                 |
| Not educated               | 149(49)                         |
| Educated                   | 156(51)                         |
| <b>Income</b>              |                                 |
| <500 OR                    | 120(39)                         |
| ≥500 OR                    | 185(61)                         |
| <b>Employment</b>          |                                 |
| Not employed               | 234(77)                         |
| Employed                   | 71(23)                          |



| Physiological                              |  |                             |     |
|--------------------------------------------|--|-----------------------------|-----|
| Duration of diabetes (years)               |  | Median (LQ, UQ)<br>6(4, 10) |     |
| Self-reported comorbidities*               |  |                             |     |
| Yes                                        |  | 277(91)                     | 269 |
| No                                         |  | 28 (9)                      | 270 |
| Current medication                         |  |                             |     |
| Anti-HTN                                   |  | 217(71)                     | 273 |
| Lipid lowering drugs                       |  | 189(62)                     | 274 |
| Oral-hypoglycaemic drugs                   |  | 260(85)                     | 275 |
| Oral-hypoglycaemic drugs with Insulin      |  | 75(25)                      | 276 |
| Diet control                               |  | 45(15)                      | 278 |
| Blood pressure (systolic/diastolic) mmHg** |  |                             |     |
| Within target (<140/<80)                   |  | 237(78)                     | 281 |
| High (≥140/≥80)                            |  | 68(22)                      | 282 |
| Fasting lipid profile (mmol/l)**           |  |                             |     |
| Cholesterol within target (< 5.0)          |  | 201(66)                     | 285 |
| Cholesterol high (≥5.0)                    |  | 104(34)                     | 286 |
| Body Mass Index (kg/m <sup>2</sup> )**     |  |                             |     |
| Healthy weight range (18.5-24.99)          |  | 34(11)                      | 289 |
| Overweight (>25-29.99)                     |  | 118(39)                     | 290 |
| Obese (>30)                                |  | 153(50)                     | 291 |
| HbA1c(%)**(>48 mmol/mol)                   |  |                             |     |
| Normal ≤7%                                 |  | 127(42)                     | 294 |
| High >7%                                   |  | 178(58)                     | 295 |
| Self-reported stages of PA                 |  |                             |     |
| Not ready (Pre-contemplation)              |  | 112(37)                     | 297 |
| Getting ready(contemplation)               |  | 95(31)                      | 298 |
| Preparation                                |  | 46(15)                      | 299 |
| Action                                     |  | 14(5)                       | 300 |
| Maintenance                                |  | 38(12)                      | 301 |
|                                            |  |                             | 302 |
|                                            |  |                             | 303 |

\*Reported hypertension, hyperlipidaemia, thyroid dysfunction or any other chronic condition coinciding with diabetes.  
\*\*Oman

304 diabetes mellitus management guidelines (2015)<sup>42</sup>

### 305 CDC questionnaire on barriers to leisure PA

306 The majority of the population, 97.7% (n=298), reported at least one barrier to  
 307 performing leisure physical activity median (LQ, UQ) was 6 (4, 7). Population  
 308 distributions were not normal across all reported barrier categories. Median sum scores  
 309 were all <5 as illustrated in (Figure 1). Except for reporting lack of willpower and lack  
 310 of resources, 75% of sum scores of other reported barriers were ≤ 5.

311

312 INSERT FIGURE 1 ABOUT HERE

313

314 Categorizing barrier scores to  $<5$  and  $\geq 5$  (significant barrier) highlighted that 'lack of  
 315 willpower' (n=139), 'lack of resources' (n=93) and 'lack of social support' (n=89) were  
 316 the most frequently reported 'significant barriers' to physical activity (Figure 2).  
 317 Barriers found to be significant in both males and females were lack of willpower  
 318 (41.5% m: 48.6% f) and lack of resources (32.3% m: 29.1% f). In addition, lack of time  
 319 in males (26.9%) and lack of social support in females (35.4%) were also noteworthy  
 320 (Table 2).

321 \_\_\_\_\_  
 322 INSERT FIGURE 2 ABOUT HERE  
 323 \_\_\_\_\_

324 Correlations between the sum scores of the nine studied barriers showed several weak  
 325 ( $R < 0.500$ ) but significant (P-value  $< 0.050$ ) associations. Positive correlations of  $> 0.400$   
 326 were noted among lack of energy with lack of time; lack of skill with lack of social

|  | Lack of | Lack of social | Lack of energy | Lack of willpower | Fear of injury | Lack of | Lack of resources | Religious barriers | Environmental barriers |
|--|---------|----------------|----------------|-------------------|----------------|---------|-------------------|--------------------|------------------------|
|--|---------|----------------|----------------|-------------------|----------------|---------|-------------------|--------------------|------------------------|

327 support; and lack of skills with lack of willpower (Table 2). Interestingly, no significant  
 328 correlations were seen within the religious and environmental barriers except for one  
 329 weak significant positive correlation between lack of resources and environmental  
 330 barriers.

|                        | time   | support |       |       |        | skill |        |       |       |
|------------------------|--------|---------|-------|-------|--------|-------|--------|-------|-------|
| Lack of time           | 1.000  | .134*   | .464* | .118* | -.116* | .035  | .013   | -.092 | .013  |
| Lack of social support | .134*  | 1.000   | .125* | .288* | .262*  | .430* | .083   | .011  | .039  |
| Lack of energy         | .464*  | .125*   | 1.000 | .306* | -.013  | .178* | .171*  | -.070 | .099  |
| Lack of willpower      | .118*  | .288*   | .306* | 1.000 | .058   | .497* | .260*  | -.112 | .053  |
| Fear of injury         | -.116* | .262*   | -.013 | .058  | 1.000  | .338* | -.218* | .032  | -.090 |
| Lack of skill          | .035   | .430*   | .178* | .497* | .338*  | 1.000 | .182*  | -.052 | .005  |
| Lack of resources      | .013   | .083    | .171* | .260* | -.218* | .182* | 1.000  | .038  | .281* |
| Religious barriers     | -.092  | .011    | -.070 | -.112 | .032   | -.052 | .038   | 1.000 | .007  |
| Environmental barriers | .013   | .039    | .099  | .053  | -.090  | .005  | .281*  | .007  | 1.000 |

331 **Table 2: Correlations between sum scores of barrier categories**

332 \*P-value <0.050

333

334 Distributions of significant high barrier score ( $\geq 5$ ) across the studied sociodemographic  
 335 factors and self-reported stages of change in PA differed among the nine barrier  
 336 categories: “Lack of time” was frequently highly scored by males, younger adults and  
 337 those who were married, employed or educated. Additionally, “Lack of social support”  
 338 was highly scored by females and “Lack of energy” by employed, or educated adults.  
 339 However, “Lack of willpower” was highly scored by individuals with lower income, or  
 340 at inactive stages of PA. Moreover, “Fear of injury” was highly scored by older adults,  
 341 unemployed, uneducated, or individuals reporting in-active stages of PA. Furthermore,  
 342 “Lack of skills” was highly scored by females, younger adults, and unemployed or  
 343 uneducated. “Lack of resources” on the other hand, was frequently highly scored by  
 344 married adults or with lower income. It is notable that the religious and environmental  
 345 barriers had no significant different distributions across any of the studied factors (Table  
 346 3).

**Table 3: Distribution of high barrier scores ( $\geq 5$ ) to leisure physical activity in adult population with type 2 diabetes across sociodemographic variables and self-reported stages of change in physical activity (n=305).**

| (%) Scores $\geq 5$ | Lack of time | Lack of social support | Lack of energy | Lack of willpower | Fear of injury | Lack of skills | Lack of resources | Religious barriers | Environmental barriers |
|---------------------|--------------|------------------------|----------------|-------------------|----------------|----------------|-------------------|--------------------|------------------------|
| Gender:             |              |                        |                |                   |                |                |                   |                    |                        |
| Male                | 26.6         | 20.8                   | 21.5           | 41.5              | 24.6           | 13.1           | 32.3              | 3.8                | 10.0                   |
| Female              | 15.4         | 35.4                   | 16.0           | 48.6              | 26.3           | 28.0           | 29.1              | 4.6                | 13.1                   |
| Corrected $\chi^2$  | 5.4          | 7.1                    | 1.2            | 1.2               | 0.04           | 8.9            | 0.2               | 0.001              | 0.4                    |
| (P-value)           | (0.020)*     | (0.008)*               | (0.278)        | (0.270)           | (0.843)        | (0.003)*       | (0.640)           | (0.981)            | (0.508)                |
| Age:                |              |                        |                |                   |                |                |                   |                    |                        |
| $\leq 57$           | 27.7         | 26.5                   | 21.3           | 45.8              | 18.7           | 16.1           | 33.5              | 4.5                | 12.3                   |
| $> 57$              | 12.7         | 32.0                   | 15.3           | 45.3              | 32.7           | 27.3           | 27.3              | 4.0                | 11.3                   |
| Corrected $\chi^2$  | 9.7          | 0.9                    | 1.4            | 0.0               | 7.1            | 5.0            | 1.1               | 0.00               | 0.0                    |
| (P-value)           | (0.002)*     | (0.347)                | (0.232)        | (1.000)           | (0.008)*       | (0.025)*       | (0.292)           | (1.000)            | (0.942)                |
| Marital status:     |              |                        |                |                   |                |                |                   |                    |                        |
| Unmarried           | 10.8         | 35.4                   | 16.9           | 43.1              | 30.8           | 24.6           | 18.5              | 7.7                | 13.8                   |
| Married             | 22.9         | 27.5                   | 18.8           | 46.3              | 24.2           | 20.8           | 33.8              | 3.3                | 11.3                   |
| Corrected $\chi^2$  | 3.9          | 1.2                    | 0.0            | 0.1               | 0.9            | 0.2            | 4.9               | 1.4                | 0.1                    |
| (P-value)           | (0.047)*     | (0.277)                | (0.875)        | (0.753)           | (0.356)        | (0.626)        | (0.026)*          | (0.231)            | (0.720)                |
| Employment:         |              |                        |                |                   |                |                |                   |                    |                        |
| Un-employed         | 12.4         | 31.6                   | 14.5           | 47.0              | 29.5           | 25.6           | 31.6              | 4.7                | 11.5                   |
| Employed            | 46.5         | 21.1                   | 31.0           | 40.8              | 12.7           | 8.5            | 26.8              | 2.8                | 12.7                   |
| Corrected $\chi^2$  | 37.0         | 2.4                    | 8.8            | 0.6               | 7.2            | 8.5            | 0.4               | 0.1                | 0.0                    |
| (P-value)           | (<0.001)*    | (0.120)                | (0.003)*       | (0.437)           | (0.007)*       | (0.004)*       | (0.527)           | (0.740)            | (0.960)                |
| Education:          |              |                        |                |                   |                |                |                   |                    |                        |
| Un-educated         | 11.4         | 33.6                   | 13.4           | 45.6              | 35.6           | 28.2           | 29.5              | 6.0                | 10.7                   |
| Educated            | 28.8         | 25.0                   | 23.1           | 45.5              | 16.0           | 15.4           | 31.4              | 2.6                | 12.8                   |
| Corrected $\chi^2$  | 13.2         | 2.3                    | 4.1            | 0.0               | 14.2           | 6.6            | 0.1               | 1.5                | 0.1                    |

1  
2  
3  
4  
5  
6  
7  
8  
9  
10  
11  
12  
13  
14  
15  
16  
17  
18  
19  
20  
21  
22  
23  
24  
25  
26  
27  
28  
29  
30  
31  
32  
33  
34  
35  
36  
37  
38  
39  
40  
41  
42  
43  
44  
45  
46  
47  
48  
49

|                             |           |         |          |          |           |          |          |         |         |
|-----------------------------|-----------|---------|----------|----------|-----------|----------|----------|---------|---------|
| (P-value)                   | (<0.001)* | (0.129) | (0.042)* | (1.0)    | (<0.001)* | (0.010)* | (0.816)  | (0.162) | (0.700) |
| Income:                     |           |         |          |          |           |          |          |         |         |
| <500                        | 16.7      | 26.7    | 21.7     | 54.2     | 20.8      | 23.3     | 40.0     | 5.8     | 8.3     |
| >=500                       | 22.7      | 30.8    | 16.2     | 40.0     | 28.6      | 20.5     | 24.3     | 3.2     | 14.1    |
| Corrected $\chi^2$          | 1.3       | 0.4     | 1.1      | 5.3      | 1.9       | 0.2      | 7.7      | 0.6     | 1.8     |
| (P-value)                   | (0.257)   | (0.516) | (0.294)  | (0.021)* | (0.163)   | (0.663)  | (0.005)* | (0.422) | (0.183) |
| Self-reported stages of PA: |           |         |          |          |           |          |          |         |         |
| Not active                  | 18.4      | 28.5    | 17.9     | 50.7     | 31.9      | 24.2     | 29.5     | 4.3     | 13.5    |
| Active                      | 24.5      | 30.6    | 19.4     | 34.7     | 12.2      | 16.3     | 32.7     | 4.1     | 8.2     |
| Corrected $\chi^2$          | 1.2       | 0.1     | 0.0      | 6.2      | 12.5      | 2.0      | 0.2      | 0.00    | 1.4     |
| (P-value)                   | (0.276)   | (0.808) | (0.873)  | (0.012)* | (<0.001)* | (0.161)  | (0.667)  | (1.0)   | (0.244) |

\* Significant at P<0.050

For peer review only

## 1 Factor analysis and reliability test results

2 Initially, the factorability of the 27 items/questions was examined. The Kaiser-Meyer-  
3 Olkin (KMO) measure of sampling adequacy was 0.711, above the commonly  
4 recommended value of 0.600. Bartlett's test of sphericity (test of at least one significant  
5 correlation between 2 of the items studied) was also significant ( $\chi^2(351) = 2600.175, p$   
6  $< .05$ ).<sup>43</sup> The communalities (proportion of item's variance explained by the extracted  
7 factors) were all above 0.300, further confirming that each item shared some common  
8 variance with other items. Given these overall indicators, factor analysis was regarded  
9 to be suitable with all the 27 items/questions.

10 PCA indicated that the first eight components (1-8) with eigenvalues of  $\geq 1$ , namely lack  
11 of resources, fear of injury, lack of time/ lack of energy, environmental barriers,  
12 religious barriers, lack of willpower/skills, lack of skills/ social support and lack of  
13 energy/social support, explained 13.1%, 11.4%, and 9.2%, 9.0%, 7.2%, 5.1%, 4.3% and  
14 3.8% of the variance respectively.

15 None of the 27 items were eliminated because they all met a minimum criteria of having  
16 a primary factor loading (how much a factor explains a variable) of 0.4 or above.

17 Solutions for the eight components were examined using Oblimin rotation of the factor  
18 loading matrix. The factor loading matrix for this final solution is presented in Table 4.

19 All factor loadings were in the same direction of the barrier categories used in the  
20 current study where a set of three items instructed a barrier category except for  
21 items/questions related to lack of skills (Q20), lack of social support (Q16) and lack of  
22 energy (Q10) which loaded up with lack of willpower (Q18, 11& 4), lack of skills (Q6  
23 & 13) and lack of social support (Q9) respectively indicating cross contributions.

24 Component correlation matrix, presented (Table 5), shows weak correlations between  
25 the extracted eight components  $< 0.200$  except for the negative correlation of 0.201

26 between component 2 (fear of injury) and 7 (combination of lack of skills and social  
27 support).

28 McDonald's coefficient Omega was equal to 0.750 indicating moderate reliability of the  
29 27 items/questions scale.<sup>39</sup>

30 **Table 4: The extracted components and factor loadings based on a principal**  
31 **components analysis with Oblimin rotation for the 27 items/questions used in the**  
32 **current study (N = 305)**

| Items/<br>questions | Extracted components (1-8)* |      |      |      |      |       |       |      |
|---------------------|-----------------------------|------|------|------|------|-------|-------|------|
|                     | 1                           | 2    | 3    | 4    | 5    | 6     | 7     | 8    |
| Q21                 | .784                        |      |      |      |      |       |       |      |
| Q7                  | .772                        |      |      |      |      |       |       |      |
| Q14                 | .721                        |      |      |      |      |       |       |      |
| Q19                 |                             | .871 |      |      |      |       |       |      |
| Q5                  |                             | .813 |      |      |      |       |       |      |
| Q12                 |                             | .776 |      |      |      |       |       |      |
| Q1                  |                             |      | .748 |      |      |       |       |      |
| Q15                 |                             |      | .745 |      |      |       |       |      |
| Q17                 |                             |      | .719 |      |      |       |       |      |
| Q3                  |                             |      | .593 |      |      |       |       |      |
| Q8                  |                             |      |      |      |      |       |       |      |
| Q24                 |                             |      |      | .922 |      |       |       |      |
| Q26                 |                             |      |      | .909 |      |       |       |      |
| Q22                 |                             |      |      | .837 |      |       |       |      |
| Q25                 |                             |      |      |      | .899 |       |       |      |
| Q23                 |                             |      |      |      | .870 |       |       |      |
| Q27                 |                             |      |      |      | .774 |       |       |      |
| Q20                 |                             |      |      |      |      | -.784 |       |      |
| Q18                 |                             |      |      |      |      | -.764 |       |      |
| Q11                 |                             |      |      |      |      | -.681 |       |      |
| Q4                  |                             |      |      |      |      | -.577 |       |      |
| Q16                 |                             |      |      |      |      |       | -.787 |      |
| Q13                 |                             |      |      |      |      |       | -.705 |      |
| Q6                  |                             |      |      |      |      |       | -.514 |      |
| Q2                  |                             |      |      |      |      |       |       |      |
| Q9                  |                             |      |      |      |      |       |       | .818 |
| Q10                 |                             |      |      |      |      |       |       | .604 |

\*1=lack of resources, 2=fear of injury, 3=lack of time/ lack of energy, 4=environmental barriers, 5=religious barriers, 6=lack of willpower/skills, 7=lack of skills/ social support and 8=lack of energy/social support.

**Table 5: Component correlation matrix**

| Extracted components* | 1     | 2     | 3     | 4     | 5     | 6     | 7     | 8     |
|-----------------------|-------|-------|-------|-------|-------|-------|-------|-------|
| 1                     | 1.000 | -.154 | .007  | .047  | -.042 | -.176 | .002  | .004  |
| 2                     | -.154 | 1.000 | -.086 | -.018 | .011  | -.052 | -.201 | -.005 |
| 3                     | .007  | -.086 | 1.000 | .060  | -.116 | -.120 | -.044 | .155  |
| 4                     | .047  | -.018 | .060  | 1.000 | .008  | -.020 | -.009 | .049  |
| 5                     | -.042 | .011  | -.116 | .008  | 1.000 | .081  | -.018 | -.029 |
| 6                     | -.176 | -.052 | -.120 | -.020 | .081  | 1.000 | .189  | -.144 |
| 7                     | .002  | -.201 | -.044 | -.009 | -.018 | .189  | 1.000 | -.140 |
| 8                     | .004  | -.005 | .155  | .049  | -.029 | -.144 | -.140 | 1.000 |

\*1=lack of resources, 2=fear of injury, 3=lack of time/ lack of energy, 4=environmental barriers, 5=religious barriers, 6=lack of willpower/skills, 7=lack of skills/ social support and 8=lack of energy/social support.

Further Factor analysis and reliability tests were conducted on the studied barrier subscales (3 questions per barrier). Table 6 provide factor loadings and McDonald's coefficient Omega for all the nine subscales used in the current study indicating excellent sub-scale quality.

**Table 6: Factor loadings and McDonald's coefficient Omega for the study subscales**

| Barrier categories     | Items/questions | factor loadings | Omega |
|------------------------|-----------------|-----------------|-------|
| Lack of time           | Q15             | 0.826           | 0.900 |
|                        | Q1              | 0.798           |       |
|                        | Q8              | 0.618           |       |
| Lack of social support | Q16             | 0.734           | 0.900 |
|                        | Q2              | 0.680           |       |
|                        | Q9              | 0.534           |       |
| Lack of energy         | Q3              | 0.755           | 0.900 |
|                        | Q17             | 0.720           |       |
|                        | Q10             | 0.581           |       |
| Lack of willpower      | Q18             | 0.837           | 0.900 |
|                        | Q4              | 0.746           |       |
|                        | Q11             | 0.691           |       |
| Fear of injury         | Q19             | 0.904           | 0.900 |
|                        | Q12             | 0.823           |       |
|                        | Q5              | 0.803           |       |
| Lack of skills         | Q6              | 0.840           | 0.900 |
|                        | Q13             | 0.646           |       |
|                        | Q20             | 0.560           |       |
| Lack of resources      | Q7              | 0.837           | 0.900 |
|                        | Q21             | 0.831           |       |
|                        | Q14             | 0.754           |       |
| Religious barriers     | Q25             | 0.905           | 0.900 |
|                        | Q23             | 0.872           |       |
|                        | Q27             | 0.786           |       |



|                        |     |       |       |
|------------------------|-----|-------|-------|
| Environmental barriers | Q24 | 0.924 | 0.900 |
|                        | Q26 | 0.913 |       |
|                        | Q22 | 0.847 |       |

## 44 DISCUSSION

45 Despite evidence on the effectiveness of meeting PA levels in the management of T2D,  
 46 and associated cardiovascular risk factors,<sup>6 7</sup> PA is poorly addressed in routine diabetes  
 47 care.<sup>44</sup> Low PA levels in populations with T2D are consistently reported in western  
 48 countries, for example, USA<sup>45</sup> as well as Arabic speaking countries namely Oman,  
 49 Saudi Arabia and Lebanon.<sup>2 46 47</sup> Addressing perceived barriers to performing  
 50 recommended PA levels in this population is crucial for planning effective PA  
 51 promoting interventions.

52 Within a series of formative studies to inform a culturally congruent PA intervention in  
 53 diabetes care,<sup>48</sup> this study has looked at perceived barriers to performing leisure time  
 54 physical activity in an adult population with T2D attending primary care using an  
 55 adapted CDC questionnaire translated to Arabic language.<sup>14</sup>

56 The current findings relating to willpower, resources and social support were also  
 57 reported as the top three barriers to PA in the Saudi population attending primary care  
 58 by AlQuaiz (2009).<sup>14</sup> In the West, USA in particular, the strongest reported barriers to  
 59 physical activity among adults with T2D were pain (41%), followed by lack of  
 60 willpower (27%), and poor health (21%).<sup>49</sup>

61 In the current study, lack of willpower was significantly highly reported by individuals  
 62 with low income. This finding is difficult to interpret in the absence of true verifications  
 63 for the self-reported house hold income. However low income could be linked to  
 64 financial constraints which were reported to have negative influence on intention to  
 65 participate in leisure-time physical activity in adult population with T2D in Canada.<sup>50</sup>  
 66 Additionally in a study in USA, older individuals with low income who were found to

1  
2  
3  
4  
5  
6  
7  
8  
9  
10  
11  
12  
13  
14  
15  
16  
17  
18  
19  
20  
21  
22  
23  
24  
25  
26  
27  
28  
29  
30  
31  
32  
33  
34  
35  
36  
37  
38  
39  
40  
41  
42  
43  
44  
45  
46  
47  
48  
49  
50  
51  
52  
53  
54  
55  
56  
57  
58  
59  
60

67 be depressed had had low participation in social activities had less odds of engaging in  
68 PA.<sup>51</sup> None the less, more evidence is needed to explain how income alters the  
69 willpower for performing leisure PA in Arabic speaking countries namely Oman.  
70 Comparably, lack of willpower was more likely to be reported by individuals at inactive  
71 stages of physical activity (pre-contemplation or contemplation stages of physical  
72 activity) than those in active stages. Progressive stages of behavioural change according  
73 to the trans-theoretical model were direct correlates to PA in a review article by Trost  
74 (2002)<sup>52</sup> and direct determinants in another by Van Stralen (2009).<sup>53</sup> This finding  
75 supports the need for programs to help raise self-willpower/determination through  
76 stepped process of behaviour change from inactive (pre-contemplation) to active stages  
77 of PA (action and maintenance).<sup>54</sup> Interestingly, fear of injury was the only other  
78 reported barrier significantly different between individuals at inactive vs active stages of  
79 change in PA. This could be explained by possible physical constraints pertaining to  
80 older age<sup>51</sup> and existing comorbidities in the current study population triggering fear of  
81 injuries associated with PA.

82 Limited resources including high cost and limited facilities for PA have been reported  
83 as significant barriers to PA across different cultures.<sup>20 22</sup> In the current study, limited  
84 resources were reported as significant by individuals who were married and those with  
85 low income. Married individuals could have more financial commitments to their  
86 families especially in the Gulf Cooperation Council countries where extended families  
87 are common.<sup>55</sup> This may alter an individual's priorities for house-hold income  
88 expenditure. Low income was similarly reported as a barrier in a Saudi population,  
89 possibly due to the perceived high cost of utilising PA facilities.<sup>14</sup> This may reflect a  
90 narrow view on what constitutes PA and a misconception that expensive equipment is  
91 required. Hence, irrespective of culture, interventions promoting cost neutral PA such as  
92 walking in populations would be highly desirable to overcome this barrier.<sup>48 56</sup>

1  
2 93 Lack of social support was frequently reported by females in this study. Meeting  
3  
4 94 cultural norms and social expectations related to safety, security and conservative dress  
5  
6 95 mainly for females were reported as barriers to PA in South Asian (Pakistani and  
7  
8 96 Indian) British populations<sup>18 21</sup> and populations in Arabic counties such as Qatar.<sup>57</sup>  
9  
10 97 Evaluation of interventions to provide the necessary social support and networks to PA  
11  
12 98 specifically for women with T2D, particularly in the countries of the Gulf Cooperation  
13  
14 99 Council are warranted. Activities including group-based activities and buddying,<sup>58-60</sup>  
15  
16 100 are worth further investigation.  
17  
18  
19  
20 101 Other reported barriers such as fear of injury and lack of skills varied across subgroups  
21  
22 102 in particular, older, unemployed, and uneducated individuals. Older individuals with  
23  
24 103 T2D are more vulnerable to have poor vision and osteoarthritic changes that may cause  
25  
26 104 fall and injuries.<sup>61</sup> Moreover the negative influence of pain to PA in older population  
27  
28 105 with T2D was reported in western countries,<sup>49</sup> and hence potential barriers to  
29  
30 106 individuals' participation. These results suggest that programs to promote PA should be  
31  
32 107 individualized for type, frequency and intensity of PA and incorporate safety measures  
33  
34 108 to prevent PA induced pain and injuries in older individuals.<sup>62</sup>  
35  
36  
37  
38 109 Lack of time on the other hand, has been a highly cited barrier to PA in the general  
39  
40 110 population as well as populations with diabetes.<sup>15-18 21 22 49 63</sup> However, unlike the study  
41  
42 111 by Alquaiz (2009), significant scores for lack of time in this study were higher in males  
43  
44 112 compared to females<sup>14</sup> along-with a lack of energy, which may be a reflection of the fact  
45  
46 113 that more males than females were educated and employed. This perception of 'lack of  
47  
48 114 time', in addition to family and social commitments may jeopardized their time for PA  
49  
50 115 especially if individuals were younger and married. This discussion highlights the  
51  
52 116 importance of changing people's perceptions of PA but also consideration of  
53  
54 117 opportunities in other PA domains namely work and travel that could enable individuals  
55  
56 118 with less leisure time to increase overall PA and behaviour.  
57  
58  
59  
60

1  
2 119 Factors which are independent of an individual's decision-making, such as environment  
3  
4 120 and religion had no significant associations in the current study despite the hot weather  
5  
6 121 during data collection of this study in April/May. These null results, may be real or may  
7  
8 122 be due to the wording of the questions and their interpretation. To address this gap in  
9  
10 123 the literature, a qualitative exploration of possible environmental, including seasonal  
11  
12 124 variations, and religious factors affecting PA performance may be warranted.

13  
14  
15 125 Additionally, results of this study cannot be generalised across all regions in Oman.  
16  
17 126 More information is required from rural Omani communities where perceptions on PA  
18  
19 127 may be different. Despite the excellent scale reliability measures in the current data, the  
20  
21 128 results cannot be generalized due to possible differences in scale quality across various  
22  
23 129 data.<sup>39</sup> Despite efforts to minimize potential bias due to the subjective nature of self-  
24  
25 130 reports, accuracy of outcomes cannot be fully ensure. Moreover, due to the cross-  
26  
27 131 sectional design of this study, causal inferences cannot be drawn.

28  
29  
30  
31 132 Finally, future attempts to explore barriers to PA should equally include work and travel  
32  
33 133 domains to cater for diversities in both PA behaviour and sedentary lifestyle across  
34  
35 134 subgroups of adults with T2D.

## 36 37 38 39 135 **CONCLUSION**

40  
41  
42 136 This study identified lack of willpower, low resources and low social support  
43  
44 137 (especially in females) as the most common barriers to performing leisure PA. Overall,  
45  
46 138 the findings suggest that the design of physical activity interventions should consider a)  
47  
48 139 the inclusion of individuals' readiness to change b) options for PA resources and social  
49  
50 140 support c) approaches aimed at increasing individuals' understanding of what  
51  
52 141 constitutes PA and d) methods that are flexible and tailored to the specific needs of  
53  
54 142 subgroups of adults with T2D.  
55  
56  
57  
58  
59  
60

1  
2 143 **ETHICAL CONSIDERATION**  
3

4  
5 144 Ethical approval was obtained from the Regional Research Committee in Muscat, Oman  
6  
7 145 Ministry of Health. All eligible participants provided informed consent prior to data  
8  
9 146 collection. For illiterate individuals, consents to participate in this study were provided  
10  
11 147 by their accompanying support member (spouse, son or daughter).  
12  
13

14  
15 148 **COMPETING INTERESTS**  
16

17  
18 149 The authors declare that they have no competing interests.  
19

20  
21 150 **FUNDING**  
22

23  
24 151 The Oman Ministry of Health funded this project as part of a PhD grant offered to the  
25  
26 152 corresponding author.  
27  
28

29  
30 153 **AUTHORS' CONTRIBUTION**  
31

32  
33 154 TS is the principal investigator in charge of the project. SM, YA, EB, AC and ASA  
34  
35 155 have all been involved in designing the intervention and the evaluation. TS prepared the  
36  
37 156 initial draft of the manuscript and all other authors have contributed. All authors have  
38  
39 157 critically reviewed and approved the final version of the manuscript.  
40  
41

42  
43 158 **ACKNOWLEDGEMENTS**  
44

45  
46 159 We would like to thank Dr. Ahmed Al-qasmi, Director General of Directorate of  
47  
48 160 Planning and Dr.Fatma Al-ajmi, Director General of Health Services, Muscat in Oman  
49  
50 161 Ministry of Health for their support and constant supervision. Additionally, special  
51  
52 162 thanks to Dr. Adil Al Wahaibi for his assistance with the study statistics.  
53  
54

55 163 **DATA SHARING STATEMENT** No additional data are available.  
56  
57  
58  
59  
60

## 164 REFERENCES

- 165 1. International Diabetes Federation. IDF DIABETES ATLAS-7TH EDITION  
 166 Brussels, Belgium; 2015 [Available from: <http://www.diabetesatlas.org>  
 167 May 2016.
- 168 2. Al Riyami A, Abd Elaty MA, Morsi M, et al. Oman World Health Survey: Part 1 - methodology,  
 169 sociodemographic profile and epidemiology of non-communicable diseases in Oman.  
 170 *Oman Med J* 2012;27(5):425-43.
- 171 3. World Health Organization. Physical activity  
 172
- 173 WHO; 2014 [fact sheet]. Available from:  
 174 <http://www.who.int/mediacentre/factsheets/fs385/en/> accessed 21st May 2014.
- 175 4. Badran M, Laher I. Type II Diabetes Mellitus in Arabic-Speaking Countries. *International*  
 176 *Journal Of Endocrinology* 2012;2012:902873-73. doi: 10.1155/2012/902873
- 177 5. Oman Health Vision 2050. 2012.
- 178 6. American Diabetes Association. Exercise and type 2 diabetes: American College of Sports  
 179 Medicine and the American Diabetes Association: Joint Position Statement. *Medicine*  
 180 *and Science in Sports and Exercise* 2010;42(12):2282-303. doi:  
 181 10.1249/MSS.0b013e3181eeb61c
- 182 7. Di Loreto C, Fanelli C, Lucidi P, et al. Make your diabetic patients walk: long-term impact of  
 183 different amounts of physical activity on type 2 diabetes. *Diabetes care*  
 184 2005;28(6):1295-302.
- 185 8. World Health Organization. WHO's Global Recommendations on PA for Health 2010  
 186 [Available from:  
 187 [http://whqlibdoc.who.int/publications/2010/9789241599979\\_eng.pdf](http://whqlibdoc.who.int/publications/2010/9789241599979_eng.pdf).
- 188 9. Heath GW, Parra DC, Sarmiento OL, et al. Evidence-based intervention in physical activity:  
 189 lessons from around the world. *Lancet* 2012;380(9838):272-81. doi: 10.1016/S0140-  
 190 6736(12)60816-2
- 191 10. Morrato EH, Hill JO, Wyatt HR, et al. Physical activity in U.S. adults with diabetes and at risk  
 192 for developing diabetes, 2003. *Diabetes care* 2007;30(2):203-09.
- 193 11. Colberg SR, Sigal RJ, Fernhall B, et al. Exercise and type 2 diabetes: The American College of  
 194 Sports Medicine and the American Diabetes Association: Joint position statement.  
 195 *Diabetes care* 2010;33(12):e147-e67. doi: 10.2337/dc10-9990
- 196 12. Arem H, Moore SC, Patel A, et al. Leisure time physical activity and mortality: a detailed  
 197 pooled analysis of the dose-response relationship. *JAMA internal medicine*  
 198 2015;175(6):959-67. doi: 10.1001/jamainternmed.2015.0533 [published Online First:  
 199 2015/04/07]
- 200 13. Hallman DM, Mathiassen SE, Gupta N, et al. Differences between work and leisure in  
 201 temporal patterns of objectively measured physical activity among blue-collar workers.  
 202 *BMC Public Health* 2015;15(1):976. doi: 10.1186/s12889-015-2339-4
- 203 14. AlQuaiz et al. Barriers to a healthy lifestyle among patients attending primary care clinics at  
 204 a university hospital in Riyadh. *Annals Of Saudi Medicine* 2009;29(1):30-35.
- 205 15. Egan AM, Mahmood WAW, Fenton R, et al. Barriers to exercise in obese patients with type  
 206 2 diabetes. *QJM: Monthly Journal Of The Association Of Physicians* 2013;106(7):635-  
 207 38. doi: 10.1093/qjmed/hct075
- 208 16. Korkiakangas EE, Alahuhta MA, Husman PM, et al. Motivators and barriers to exercise  
 209 among adults with a high risk of type 2 diabetes--a qualitative study. *Scandinavian*  
 210 *Journal Of Caring Sciences* 2011;25(1):62-69. doi: 10.1111/j.1471-6712.2010.00791.x
- 211 17. Hume C, Dunstan D, Salmon J, et al. Are barriers to physical activity similar for adults with  
 212 and without abnormal glucose metabolism? *The Diabetes Educator* 2010;36(3):495-  
 213 502. doi: 10.1177/0145721710368326



- 1  
2 214 18. Korhakangas EE, Alahuhta MA, Laitinen JH. Barriers to regular exercise among adults at  
3 215 high risk or diagnosed with type 2 diabetes: a systematic review. *Health Promotion*  
4 216 *International* 2009;24(4):416-27. doi: 10.1093/heapro/dap031
- 5 217 19. Labrunée M, Antoine D, Vergès B, et al. Effects of a home-based rehabilitation program in  
6 218 obese type 2 diabetics. *Annals Of Physical And Rehabilitation Medicine*  
7 219 2012;55(6):415-29. doi: 10.1016/j.rehab.2012.06.001
- 8 220 20. Booth AO, Lewis C, Dean M, et al. Diet and physical activity in the self-management of type  
9 221 2 diabetes: barriers and facilitators identified by patients and health professionals.  
10 222 *Primary Health Care Research & Development* 2013;14(3):293-306. doi:  
11 223 10.1017/S1463423612000412
- 12 224 21. Lawton J, Ahmad N, Hanna L, et al. 'I can't do any serious exercise': barriers to physical  
13 225 activity amongst people of Pakistani and Indian origin with Type 2 diabetes. *Health*  
14 226 *Education Research* 2006;21(1):43-54.
- 15 227 22. Mier N, Medina AA, Ory MG. Mexican Americans with type 2 diabetes: perspectives on  
16 228 definitions, motivators, and programs of physical activity. *Preventing chronic disease*  
17 229 2007;4(2):A24-A24.
- 18 230 23. Wanko NS, Brazier CW, Young-Rogers D, et al. Exercise preferences and barriers in urban  
19 231 African Americans with type 2 diabetes. *The Diabetes Educator* 2004;30(3):502-13.
- 20 232 24. Al-Otaibi HH. Measuring stages of change, perceived barriers and self efficacy for physical  
21 233 activity in Saudi Arabia. *Asian Pacific Journal Of Cancer Prevention: APJCP*  
22 234 2013;14(2):1009-16.
- 23 235 25. Amin TT, Suleman W, Ali A, et al. Pattern, prevalence, and perceived personal barriers  
24 236 toward physical activity among adult Saudis in Al-Hassa, KSA. *Journal Of Physical*  
25 237 *Activity & Health* 2011;8(6):775-84.
- 26 238 26. Ali HI, Baynouna LM, Bernsen RM. Barriers and facilitators of weight management:  
27 239 perspectives of Arab women at risk for type 2 diabetes. *Health & social care in the*  
28 240 *community* 2010;18(2):219-28. doi: 10.1111/j.1365-2524.2009.00896.x
- 29 241 27. Berger G, Peerson A. Giving young Emirati women a voice: participatory action research on  
30 242 physical activity. *Health & Place* 2009;15(1):117-24. doi:  
31 243 10.1016/j.healthplace.2008.03.003
- 32 244 28. Al-Kaabi J, Al-Maskari F, Saadi H, et al. Physical activity and reported barriers to activity  
33 245 among type 2 diabetic patients in the United arab emirates. *The Review Of Diabetic*  
34 246 *Studies: RDS* 2009;6(4):271-78. doi: 10.1900/RDS.2009.6.271
- 35 247 29. Serour M, Alqhenaei H, Al-Saqabi S, et al. Cultural factors and patients' adherence to  
36 248 lifestyle measures. *The British Journal Of General Practice: The Journal Of The Royal*  
37 249 *College Of General Practitioners* 2007;57(537):291-95.
- 38 250 30. Alghafri TS, Alharthi SM, Al-Farsi YM, et al. Correlates of physical activity and sitting time in  
39 251 adults with type 2 diabetes attending primary health care in Oman. Under review,  
40 252 2017.
- 41 253 31. CDC USA. "Overcoming Barriers to Physical Activity": Centers for Disease Control and  
42 254 Prevention; 2011 [Available from: [https://www.cdc.gov/diabetes/ndep/pdfs/8-road-](https://www.cdc.gov/diabetes/ndep/pdfs/8-road-to-health-barriers-quiz-508.pdf)  
43 255 [to-health-barriers-quiz-508.pdf](https://www.cdc.gov/diabetes/ndep/pdfs/8-road-to-health-barriers-quiz-508.pdf)  
44 256 accessed 16 July 2014.
- 45 257 32. Enhancing the QUALity and Transparency Of health Research. The Strengthening the  
46 258 Reporting of Observational Studies in Epidemiology (STROBE) Statement: guidelines  
47 259 for reporting observational studies 2017 [Available from: [http://www.equator-](http://www.equator-network.org/reporting-guidelines/strobe/)  
48 260 [network.org/reporting-guidelines/strobe/](http://www.equator-network.org/reporting-guidelines/strobe/) accessed 22 January 2017.
- 49 261 33. Martin SB, Morrow JR, Jr., Jackson AW, et al. Variables related to meeting the CDC/ACSM  
50 262 physical activity guidelines. *Med Sci Sports Exerc* 2000;32(12):2087-92. [published  
51 263 Online First: 2000/12/29]
- 52 264 34. Rik Crutzen & Gjalt-Jorn Ygram Peters. Scale quality: alpha is an inadequate estimate and  
53 265 factor-analytic evidence is needed first of all. *Health Psychology Review* 2015:1-6. doi:  
54 266 10.1080/17437199.2015.1124240

- 1  
2 267  
3 268  
4 269  
5 270  
6 271  
7 272  
8 273  
9 274  
10 275  
11 276  
12 277  
13 278  
14 279  
15 280  
16 281  
17 282  
18 283  
19 284  
20 285  
21 286  
22 287  
23 288  
24 289  
25 290  
26 291  
27 292  
28 293  
29 294  
30 295  
31 296  
32 297  
33 298  
34 299  
35 300  
36 301  
37 302  
38 303  
39 304  
40 305  
41 306  
42 307  
43 308  
44 309  
45 310  
46 311  
47 312  
48 313  
49 314  
50 315  
51 316  
52 317  
53 318  
54 319  
55  
56  
57  
58  
59  
60
35. R Development Core Team. 2014 [Available from: <http://r-development-core-team.software.informer.com/>].
36. Alghafri TS, Alharthi SM, Al-Farsi YM, et al. Correlates of physical activity and sitting time in adults with type 2 diabetes attending primary health centres in Oman, 2017.
37. Heiss V, Petosa R. Correlates of Physical Activity Among Adults With Type 2 Diabetes: A Systematic Literature Review. *American Journal of Health Education* 2014;45(5):278-87. doi: 10.1080/19325037.2014.933139
38. Ministry of Health Oman. World Health Survey Report, Ministry of Health, Oman. In: studies DoRa, ed. Muscat., 2008.
39. Dunn TJ, Baguley T, Brunsden V. From alpha to omega: a practical solution to the pervasive problem of internal consistency estimation. *British journal of psychology (London, England : 1953)* 2014;105(3):399-412. doi: 10.1111/bjop.12046 [published Online First: 2014/05/23]
40. Youngblut JM. Comparison of Factor Analysis Options Using the Home/ Employment Orientation Scale. *Nursing research* 1993;42(2):122-24.
41. Ministry of National Economy Oman. Statistical Yearbook 2011. In: Ministry of National Economy O, Muscat, Oman, ed., 2011.
42. Ministry of Health Oman. Diabetes management guidelines In: centre E, ed. Oman: MOH, 2015.
43. Tobias S, Carlson JE. BRIEF REPORT: BARTLETT'S TEST OF SPHERICITY AND CHANCE FINDINGS IN FACTOR ANALYSIS. *Multivariate Behavioral Research* 1969;4(3):375-77. doi: 10.1207/s15327906mbr0403\_8
44. Matthews L, Kirk A, MacMillan F, et al. Can physical activity interventions for adults with type 2 diabetes be translated into practice settings? A systematic review using the RE-AIM framework. *Translational Behavioral Medicine* 2014;4(1):60-78.
45. Morrato EH, Hill JO, Wyatt HR, et al. Physical activity in U.S. adults with diabetes and at risk for developing diabetes, 2003. *Diabetes care* 2007;30(2):203-9. doi: 10.2337/dc06-1128 [published Online First: 2007/01/30]
46. Al-Nozha MM, Al-Hazzaa HM, Arafah MR, et al. Prevalence of physical activity and inactivity among Saudis aged 30-70 years. A population-based cross-sectional study. *Saudi medical journal* 2007;28(4):559-68. [published Online First: 2007/04/26]
47. Sibai AM, Costanian C, Tohme R, et al. Physical activity in adults with and without diabetes: from the 'high-risk' approach to the 'population-based' approach of prevention. *BMC Public Health* 2013;13:1002-02. doi: 10.1186/1471-2458-13-1002
48. Alghafri TS, Alharthi SM, Al-Farsi YM, et al. Study protocol for "MOVEdiabetes": a trial to promote physical activity for adults with type 2 diabetes in primary health care in Oman. *BMC Public Health* 2017;17(1):28. doi: 10.1186/s12889-016-3990-0 [published Online First: 2017/01/07]
49. Thomas N, Alder E, Leese GP. Barriers to physical activity in patients with diabetes. *Postgraduate Medical Journal* 2004;80(943):287-91.
50. Boudreau F, Godin G. Understanding physical activity intentions among French Canadians with type 2 diabetes: an extension of Ajzen's theory of planned behaviour. *The International Journal of Behavioral Nutrition and Physical Activity* 2009;6:35-35. doi: 10.1186/1479-5868-6-35
51. Plow MA, Allen SM, Resnik L. Correlates of Physical Activity Among Low-Income Older Adults. *Journal of Applied Gerontology* 2011;30(5):629-42. doi: 10.1177/0733464810375685
52. Trost SG, Owen N, Bauman AE, et al. Correlates of adults' participation in physical activity: review and update. *Medicine And Science In Sports And Exercise* 2002;34(12):1996-2001.
53. van Stralen MM, De Vries H, Mudde AN, et al. Determinants of initiation and maintenance of physical activity among older adults: a literature review. *Health Psychology Review* 2009;3(2):147-207. doi: 10.1080/17437190903229462



- 1  
2 320 54. Kirk A, MacMillan F, Webster N. Application of the Transtheoretical model to physical  
3 321 activity in older adults with Type 2 diabetes and/or cardiovascular disease. *Psychology*  
4 322 *of Sport and Exercise* 2010;11(4):320-24. doi:  
5 323 <http://dx.doi.org/10.1016/j.psychsport.2010.03.001>  
6 324 55. GCC statistical center. GCC-statistics 2010 [Available from: [https://gccstat.org/en/terms-of-](https://gccstat.org/en/terms-of-use13/10/2016)  
7 325 [use13/10/2016](https://gccstat.org/en/terms-of-use13/10/2016).  
8 326 56. Bird EL, Baker G, Mutrie N, et al. Behavior change techniques used to promote walking and  
9 327 cycling: a systematic review. *Health Psychol* 2013;32(8):829-38. doi:  
10 328 10.1037/a0032078 [published Online First: 2013/03/13]  
11 329 57. Donnelly TT, Al Suwaidi J, Al Enazi NR, et al. Qatari women living with cardiovascular  
12 330 diseases-challenges and opportunities to engage in healthy lifestyles. *Health Care For*  
13 331 *Women International* 2012;33(12):1114-34. doi: 10.1080/07399332.2012.712172  
14 332 58. Bastiaens H, Sunaert P, Wens J, et al. Supporting diabetes self-management in primary  
15 333 care: pilot-study of a group-based programme focusing on diet and exercise. *Primary*  
16 334 *Care Diabetes* 2009;3(2):103-09. doi: 10.1016/j.pcd.2009.02.001  
17 335 59. Matthews L. The feasibility, effectiveness and implementation of a physical activity  
18 336 consultation service for adults within routine diabetes care. [Implementation of  
19 337 physical activity services for the management of adults with Type 2 Diabetes].  
20 338 University of Strathclyde School of Psychological Sciences and Health, 2013.  
21 339 60. Barrera M, Strycker LA, Mackinnon DP, et al. Social-ecological resources as mediators of  
22 340 two-year diet and physical activity outcomes in type 2 diabetes patients. *Health*  
23 341 *Psychology: Official Journal Of The Division Of Health Psychology, American*  
24 342 *Psychological Association* 2008;27(2 Suppl):S118-S25. doi: 10.1037/0278-  
25 343 6133.27.2(Suppl.).S118  
26 344 61. Alberti KGMM, Zimmet PZ. Definition, diagnosis and classification of diabetes mellitus and  
27 345 its complications. Part 1: diagnosis and classification of diabetes mellitus. Provisional  
28 346 report of a WHO Consultation. *Diabet Med* 1998;15(7):539-53. doi:  
29 347 10.1002/(SICI)1096-9136(199807)15:7<539::AID-DIA668>3.0.CO;2-S  
30 348 62. Borschmann K, Moore K, Russell M, et al. Overcoming barriers to physical activity among  
31 349 culturally and linguistically diverse older adults: a randomised controlled trial.  
32 350 *Australasian Journal On Ageing* 2010;29(2):77-80. doi: 10.1111/j.1741-  
33 351 6612.2009.00390.x  
34 352 63. Donahue KE, Mielenz TJ, Sloane PD, et al. Identifying supports and barriers to physical  
35 353 activity in patients at risk for diabetes. *Preventing chronic disease* 2006;3(4):A119-A19.

354

355 **Figure 1: Box and Whisker plots for the reported barrier sum scores of 0-9 (high**  
356 **scores defined as  $\geq 5$ )**

357 **Figure 2: Percentage of reported high barrier scores ( $\geq 5$ )**

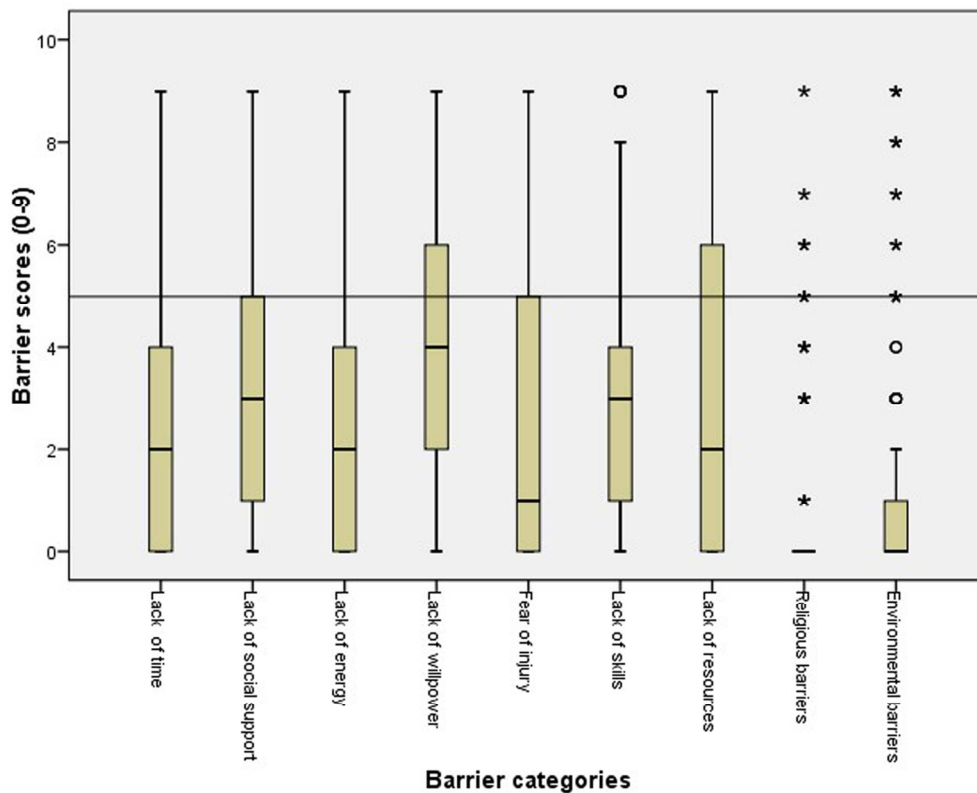

Figure 1: Box and Whisker plots for the reported barrier sum scores of 0-9 (high scores defined as  $\geq 5$ )

132x106mm (300 x 300 DPI)

For peer review only

1  
2  
3  
4  
5  
6  
7  
8  
9  
10  
11  
12  
13  
14  
15  
16  
17  
18  
19  
20  
21  
22  
23  
24  
25  
26  
27  
28  
29  
30  
31  
32  
33  
34  
35  
36  
37  
38  
39  
40  
41  
42  
43  
44  
45  
46  
47  
48  
49  
50  
51  
52  
53  
54  
55  
56  
57  
58  
59  
60

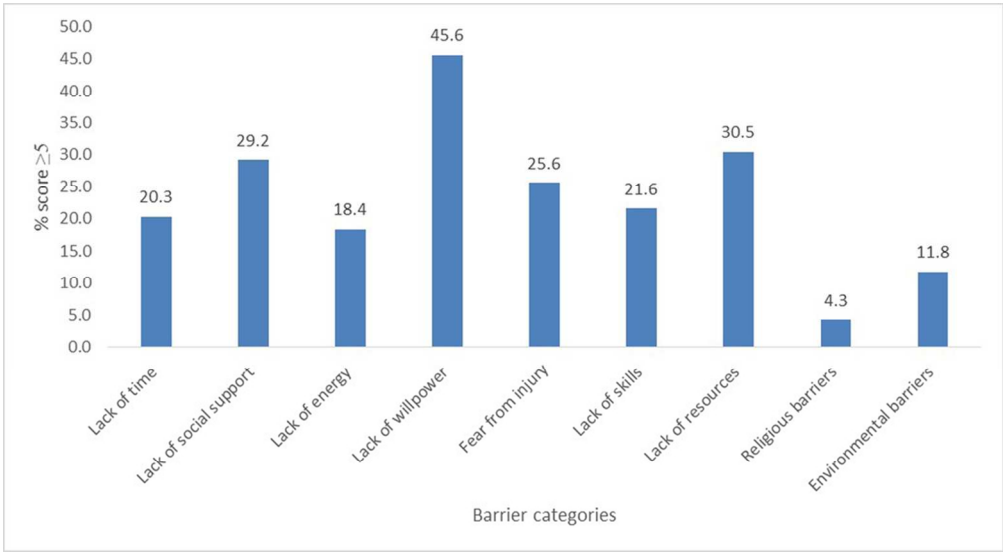

Figure 2: Percentage of reported high barrier scores ( $\geq 5$ )

96x53mm (300 x 300 DPI)

review only

| من فضلك أجب عن الأسئلة التالية |        |             |            |                                                                                                          |
|--------------------------------|--------|-------------|------------|----------------------------------------------------------------------------------------------------------|
| ٠                              | ١      | ٢           | ٣          |                                                                                                          |
| لا أبداً                       | نادراً | نعم أحياناً | نعم غالباً |                                                                                                          |
|                                |        |             |            | ١ يومي مشغول جداً لذلك لا أستطيع أن أجعل لي وقت خاص بالتمارين ضمن جدولتي اليومي                          |
|                                |        |             |            | ٢ لا أحد من أفراد عائلتي أو أصدقائي يفضلون ممارسة الرياضة لذلك فأني لا أجد فرصة لممارستها                |
|                                |        |             |            | ٣ أكون متعب جداً بعد العمل فلا أستطيع ممارسة الرياضة                                                     |
|                                |        |             |            | ٤ كنت أفكر في زيادة التمارين الرياضية لكن لا يبدو أنني أستطيع البدء بذلك                                 |
|                                |        |             |            | ٥ أنني كبير في السن لذا فممارسة الرياضة تشكل خطراً على                                                   |
|                                |        |             |            | ٦ لا أمارس الرياضة كثيراً وذلك لأنني لم أتعلم مهارات إي نوع من أنواع الرياضة                             |
|                                |        |             |            | ٧ المسابح، المسارات، الدراجات ..... الخ غير متوفرة للاستخدام بالنسبة لي                                  |
|                                |        |             |            | ٨ ممارسة الرياضة تأخذ الكثير من وقت التزامات أخرى مثل وقت العمل والأسرة                                  |
|                                |        |             |            | ٩ أشعر بالخجل من منظري وأنا أمارس الرياضة مع الآخرين                                                     |
|                                |        |             |            | ١٠ أنا لا أحصل على القدر المكافئ من النوم فلا أستطيع الاستيقاظ مبكراً أو البقاء في الليل لممارسة الرياضة |
|                                |        |             |            | ١١ من الأسهل علي إيجاد عذر لعدم ممارسه الرياضه من الخروج لعمل شئ آخر                                     |
|                                |        |             |            | ١٢ أنا أعرف أناس كثيرين أدوا أنفسهم من كثرة ممارسة الرياضة                                               |
|                                |        |             |            | ١٣ أنا أرى أنه لا يمكن تعلم أي رياضه جديدة في مثل سني                                                    |
|                                |        |             |            | ١٤ أن ممارسة الرياضة أمر مكلف جداً فيجب علي شراء أدوات رياضيه أو أخذ دروس رياضيه                         |
|                                |        |             |            | ١٥ وقت فراغي أثناء اليوم ضيق جداً لا يكفي لأداء التمارين الرياضية                                        |
|                                |        |             |            | ١٦ نشاطاتي الاجتماعية المعتادة مع العائلة والأصدقاء لا تتضمن أي نشاط رياضي                               |
|                                |        |             |            | ١٧ أنا متعبة جداً خلال أيام الأسبوع واحتاج أيام العطله للراحة وليس للرياضة                               |
|                                |        |             |            | ١٨ أريد ان أمارس المزيد ولكن يبدو أنني لا أستطيع أن استمر على شئ معين                                    |
|                                |        |             |            | ١٩ أخاف ان أؤذي نفسي او أصاب بأزمه قلبيه                                                                 |
|                                |        |             |            | ٢٠ ليس لدي القدرة الكافية لتحويل ممارسة الرياضة لمتعه                                                    |
|                                |        |             |            | ٢١ لو كانت هناك أجهزه رياضية وغرف للاستحمام في موقع العمل لكان من الأرجح ان أقوم بالتمارين الرياضية      |
|                                |        |             |            | ٢٢ معتقداتي الدينيه لا تسمح لي بممارسه النشاط البدني                                                     |
|                                |        |             |            | ٢٣ الطقس (الحراو البرد الشديدين) لا يسمح لي بممارسه النشاط البدني                                        |
|                                |        |             |            | ٢٤ الملابس الرياضيه غير لا تتناسب مع مجتمعا                                                              |
|                                |        |             |            | ٢٥ النشاط البدني في الصيف غير مناسب لي                                                                   |
|                                |        |             |            | ٢٦ أخلاقيات الدينيه لا تسمح لي بممارسه النشاط البدني                                                     |
|                                |        |             |            | ٢٧ البيئه المحيطة لا يسمح لي بممارسه النشاط البدني                                                       |

STROBE Statement—checklist of items that should be included in reports of observational studies

|                           | Item No | Page number (where information can be found in the manuscript) |
|---------------------------|---------|----------------------------------------------------------------|
| Title and abstract        | 1       | 1 & 2-3                                                        |
| <b>Introduction</b>       |         |                                                                |
| Background/rationale      | 2       | 4                                                              |
| Objectives                | 3       | 5                                                              |
| <b>Methods</b>            |         |                                                                |
| Study design              | 4       | 5                                                              |
| Setting                   | 5       | 6                                                              |
| Participants              | 6       | 6                                                              |
| Variables                 | 7       | 6                                                              |
| Data sources/ measurement | 8       | 6                                                              |
| Bias                      | 9       | 7                                                              |
| Study size                | 10      | 8                                                              |
| Quantitative variables    | 11      | 8                                                              |
| Participants              | 13      | 8                                                              |
| <b>Results</b>            |         |                                                                |
| Descriptive data          | 14      | 8-9                                                            |
| Outcome data              | 15      | 10-14                                                          |
| Main results              | 16      | 14-15                                                          |
| Other analyses            | 17      | 15                                                             |
| <b>Discussion</b>         |         |                                                                |
| Key results               | 18      | 16-18                                                          |
| Limitations               | 19      | 19                                                             |
| Interpretation            | 20      | 19                                                             |
| Generalisability          | 21      | 19                                                             |
| <b>Other information</b>  |         |                                                                |
| Funding                   | 22      | 20                                                             |

# BMJ Open

## Perceived barriers to leisure time physical activity in adults with type 2 diabetes attending primary health care in Oman: a cross-sectional survey

|                                 |                                                                                                                                                                                                                                                                                                                                                                                                                                                                                                                                                                                       |
|---------------------------------|---------------------------------------------------------------------------------------------------------------------------------------------------------------------------------------------------------------------------------------------------------------------------------------------------------------------------------------------------------------------------------------------------------------------------------------------------------------------------------------------------------------------------------------------------------------------------------------|
| Journal:                        | <i>BMJ Open</i>                                                                                                                                                                                                                                                                                                                                                                                                                                                                                                                                                                       |
| Manuscript ID                   | bmjopen-2017-016946.R3                                                                                                                                                                                                                                                                                                                                                                                                                                                                                                                                                                |
| Article Type:                   | Research                                                                                                                                                                                                                                                                                                                                                                                                                                                                                                                                                                              |
| Date Submitted by the Author:   | 11-Sep-2017                                                                                                                                                                                                                                                                                                                                                                                                                                                                                                                                                                           |
| Complete List of Authors:       | Alghafri, Thamra; Ministry of Health, Planning<br>Alharthi, Saud; Ministry of Health, Medicine<br>Al-Farsi, Yahya; Sultan Qaboos University College of Medicine and Health Science, FAMCO<br>Bannerman, Elaine; Ninewells Hospital and Medical School., Centre for Public Health Nutrition Research, University of Dundee<br>Craigie, Angela; Centre for Research into Cancer Prevention and Screening, Medical Research Institute, University of Dundee<br>Anderson, Annie; Ninewells Hospital and Medical School, Centre for Public Health Nutrition Research, University of Dundee |
| <b>Primary Subject Heading</b>: | Diabetes and endocrinology                                                                                                                                                                                                                                                                                                                                                                                                                                                                                                                                                            |
| Secondary Subject Heading:      | Sports and exercise medicine                                                                                                                                                                                                                                                                                                                                                                                                                                                                                                                                                          |
| Keywords:                       | Physical Activity, Type 2 diabetes, Primary health care, Barriers, Oman, General diabetes < DIABETES & ENDOCRINOLOGY, PUBLIC HEALTH, SPORTS MEDICINE                                                                                                                                                                                                                                                                                                                                                                                                                                  |
|                                 |                                                                                                                                                                                                                                                                                                                                                                                                                                                                                                                                                                                       |

SCHOLARONE™  
Manuscripts

1  
2  
3  
4  
5  
6  
7  
8  
9  
10  
11  
12  
13  
14  
15  
16  
17  
18  
19  
20  
21  
22  
23  
24  
25  
26  
27  
28  
29  
30  
31  
32  
33  
34  
35  
36  
37  
38  
39  
40  
41  
42  
43  
44  
45  
46  
47  
48  
49  
50  
51  
52  
53  
54  
55  
56  
57  
58  
59  
60

1 **Perceived barriers to leisure time physical activity in adults with type 2 diabetes**  
2 **attending primary health care in Oman: a cross-sectional survey**

3 **Thamra S Alghafri<sup>1\*</sup>, Saud M Alharthi<sup>1</sup>, Yahya Al-farsi<sup>2</sup>, Elaine Bannerman<sup>3</sup>, Angela M**  
4 **Craigie<sup>3</sup>, Annie S Anderson<sup>3</sup>**

5 <sup>1</sup>Directorate General of Health Services, Ministry of Health, Muscat, Oman.

6 <sup>2</sup>Department of Family Medicine and Public Health, College of Medicine and Health  
7 Sciences, Sultan Qaboos University, Oman.

8 <sup>3</sup>Centre for Public Health Nutrition Research, University of Dundee, Ninewells Hospital  
9 and Medical School.

10 \*Corresponding author: Thamra S Alghafri (TSA) PO Box 2723, Postal Code 112,  
11 Oman, email: [tsalghafri@dundee.ac.uk](mailto:tsalghafri@dundee.ac.uk), Telephone number 0096899376455

12 Email addresses:

13 Saud M Alharthi (SMA): [smsbar07@gmail.com](mailto:smsbar07@gmail.com)

14 Yahya Al-farsi (YMF): [ymfarsi@gmail.com](mailto:ymfarsi@gmail.com)

15 Elaine Bannerman (EB): [e.bannerman@dundee.ac.uk](mailto:e.bannerman@dundee.ac.uk)

16 Angela M. Craigie (AMC): [a.craigie@dundee.ac.uk](mailto:a.craigie@dundee.ac.uk)

17 Annie S Anderson (ASA): [a.s.anderson@dundee.ac.uk](mailto:a.s.anderson@dundee.ac.uk)

18 **WORD COUNT:** 4256

19 **COPYRIGHT:** The Corresponding Author has the right to grant on behalf of all  
20 authors and does grant on behalf of all authors, an exclusive licence on a worldwide  
21 basis to the BMJ Publishing Group Ltd to permit this article (if accepted) to be  
22 published in BMJ editions and any other BMJ PGL products and sublicences such use  
23 and exploit all subsidiary rights, as set out in our licence.

1  
2  
3  
4  
5  
6  
7  
8  
9  
10  
11  
12  
13  
14  
15  
16  
17  
18  
19  
20  
21  
22  
23  
24  
25  
26  
27  
28  
29  
30  
31  
32

**TRANSPARENCY DECLARATION:** This manuscript is an honest, accurate, and transparent account of the study being reported. There are no important aspects of the study that are omitted; and any possible discrepancies from the study are explained.

**TECHNICAL APPENDIX:** Data generated from this study is not available for public use. However it is available from the corresponding author on reasonable request and approvals from Oman Ministry of Health.

**FUNDING:** The Oman Ministry of Health funded this project.

**CONFLICTS OF INTEREST:** No competing interests.



33 **ABSTRACT**

34 **Objectives:** Physical activity is fundamental in diabetes management for good  
35 metabolic control. This study aimed to identify barriers to performing leisure time  
36 physical activity and explore differences based on gender, age, marital status,  
37 employment, education, income and perceived stages of change in physical activity in  
38 adults with type 2 diabetes in Oman.

39 **Design:** Cross-sectional study using an Arabic version of the “Barriers to Being Active”  
40 27 item questionnaire.

41 **Setting:** Seventeen primary health centres randomly selected in Muscat.

42 **Participants:** Individuals >18 years with type 2 diabetes, attending diabetes clinic for >  
43 2 years and with no contraindications to performing physical activity.

44 **Primary and secondary outcome measures:**

45 Participants were asked to rate how far different factors influenced their physical  
46 activity, under the following categories: fear of injury, lack of time, social support,  
47 energy, willpower, skills, resources, religion and environment. On a scale of 0-9,  
48 barriers were considered important if scored  $\geq 5$ .

49 **Results:** A total of 305 questionnaires were collected. Most (96%) reported at least one  
50 barrier to performing leisure time physical activity. Lack of willpower (44.4%), lack of  
51 resources (30.5%) and lack of social support (29.2%) were the most frequently reported  
52 barriers. Using chi-square test, lack of willpower was significantly different in  
53 individuals with low vs high income (54.2% vs 40%,  $P=0.002$ ) and in those reporting  
54 inactive vs active stages of change for physical activity (50.7% vs 34.7%,  $P=0.029$ ),  
55 lack of resources was significantly different in those with low vs high income (40% vs

1  
2  
3  
4  
5  
6  
7  
8  
9  
10  
11  
12  
13  
14  
15  
16  
17  
18  
19  
20  
21  
22  
23  
24  
25  
26  
27  
28  
29  
30  
31  
32  
33  
34  
35  
36  
37  
38  
39  
40  
41  
42  
43  
44  
45  
46  
47  
48  
49  
50  
51  
52  
53  
54  
55  
56  
57  
58  
59  
60

24.3%,  $P=0.004$ ) and married vs unmarried (33.8% vs 18.5%,  $P=0.018$ ). Lack of social support was significant in females vs males (35.4% vs 20.8%,  $P=0.005$ ).

**Conclusions:** The findings can inform the design on physical activity intervention studies by testing the impact of strategies which incorporate ways to address reported barriers including approaches that enhance self-efficacy and social support.

**Key words:** Physical Activity, Type 2 diabetes, Primary health care, Barriers, Oman

## ARTICLE SUMMARY

### Strengths and limitations of this study

- Barriers to performing leisure physical activity for adults with type 2 diabetes were investigated in Oman where prevalence of both diabetes and physical inactivity is high.
- Questions on possible barriers to performing physical activity linked to religion and environment were included.
- The tool used in this study was an English to Arabic language translated questionnaire that may have affected the validity of questions.

## INTRODUCTION

Oman is located in Southwest Asia on the Southeast coast of the Arabian Peninsula. Similar to its neighbouring countries (United Arab Emirates, Saudi Arabia, Qatar, Bahrain, and Kuwait), Oman has witnessed enormous economic advancement in recent decades, along with significant increases in non-communicable diseases including a rising prevalence of diabetes. Diabetes prevalence in Oman has increased from 8.3% in 1991 to 12.3% in 2008 and recent estimates are in the order of 14.8%, exceeding global rates.<sup>1,2</sup> The World Health Organization (WHO) has indicated that physical inactivity is one of the top ten leading global causes of mortality and disability worldwide, and the principal cause for approximately 27% of diabetes, and approximately 30% of ischemic

1  
2  
3  
4  
5  
6  
7  
8  
9  
10  
11  
12  
13  
14  
15  
16  
17  
18  
19  
20  
21  
22  
23  
24  
25  
26  
27  
28  
29  
30  
31  
32  
33  
34  
35  
36  
37  
38  
39  
40  
41  
42  
43  
44  
45  
46  
47  
48  
49  
50  
51  
52  
53  
54  
55  
56  
57  
58  
59  
60

81 heart disease.<sup>3</sup> In Oman, it has been reported that almost 70% of the population are  
82 physically inactive (daily activity of  $\leq 10$  minutes).<sup>4</sup> This raises concerns regarding the  
83 impact these high levels of physical inactivity may be having on lifestyle related chronic  
84 diseases including diabetes, on health care expenditures and overall population health.<sup>5</sup>

85 The protective effects of physical activity (PA) in the management of diabetes,  
86 specifically type 2 diabetes (T2D), have been widely reported.<sup>6 7</sup> WHO recommends at  
87 least 150 minutes of moderate to vigorous physical activity or 75 minutes of vigorous  
88 PA/week.<sup>8</sup> However, over 60% of patients with diabetes in western countries do not  
89 meet the recommended levels of PA.<sup>9 10</sup> The Oman World Health Survey (OWHS)  
90 2008, reported that in Oman, only 15% of patients with diabetes (98% of them with type  
91 2 diabetes) met PA recommendations using the Global Physical Activity Questionnaire  
92 (GPAQ).<sup>2</sup>

93 The importance of leisure time PA in meeting PA recommendations is consistently<sup>11</sup>  
94 associated with reduced mortality risks (20% to >37% risk reduction) and favourable  
95 cardiovascular outcomes.<sup>12</sup> This relationship appears to have a dose-response effect  
96 where the upper threshold for mortality benefit occurs at 3 to 5 times the leisure PA  
97 recommendations of 7.5-<15 MET h/wk.<sup>12</sup> No clear association is observed for  
98 occupational or travel physical activity.<sup>13</sup>

99 Theoretical models underpinning effective interventions to promote personalized PA  
100 (contents, methods and approaches) should focus on benefits and ways to overcome  
101 barriers to PA.<sup>14</sup> Literature to date mainly from western countries has reported a number  
102 of potential barriers to performing PA in adults with diabetes. These include lack of  
103 time,<sup>15-18</sup> physical constraints including pain,<sup>19</sup> lack of knowledge and limited facilities.<sup>20</sup>  
104 Differences in reporting barriers to PA have been noted across genders, age groups,  
105 environments, cultures and disease status. Female gender, increasing age, unsafe  
106 neighbourhoods, being overweight and being a smoker increased the odds of reporting

1  
2  
3  
4  
5  
6  
7  
8  
9  
10  
11  
12  
13  
14  
15  
16  
17  
18  
19  
20  
21  
22  
23  
24  
25  
26  
27  
28  
29  
30  
31  
32  
33  
34  
35  
36  
37  
38  
39  
40  
41  
42  
43  
44  
45  
46  
47  
48  
49  
50  
51  
52  
53  
54  
55  
56  
57  
58  
59  
60

107 barriers to PA among migrant populations like African Americans, South Asian British  
108 and Mexican Americans.<sup>21-23</sup> In the Arab countries, modest evidence on barriers to PA  
109 in both the general population and in adults with T2D suggests that lack of time, co-  
110 existing diseases and adverse weather conditions<sup>14 24-29</sup> are the main factors. Moreover,  
111 the climate in this region may be a drawback to meeting recommended levels of PA due  
112 to high temperatures during the day, particularly in the sandy/desert areas. During the  
113 summer months, these countries including Oman experience major heat waves (>40  
114 degrees celsius) and humidity levels that could reach 90%.

115 The current study aimed to identify barriers to performing leisure-time PA in adults  
116 with T2D in Oman, and the distribution of barrier scores across different socio-  
117 demographic characteristics and perceived stages of change in PA.

## 118 **METHODS**

### 119 **Study design, setting and participants**

120 This cross-sectional interview based study was part of a larger study that examined  
121 correlates of physical activity and sitting time in adults with type 2 diabetes, and  
122 barriers to leisure physical activity in the same population. Results regarding the PA  
123 patterns of the population using the Global Physical Activity Questionnaire are  
124 reported elsewhere.<sup>30</sup> This current paper identified barriers to performing leisure  
125 physical activity expressed by Omani adults with T2D using adapted questions from the  
126 Centers for Disease Control and Prevention (CDC) questionnaire<sup>31</sup> conducted in April/  
127 May 2015 in Muscat (Urban communities). Reporting of this study follows the  
128 guidelines for strengthening the reporting of observational studies in epidemiology  
129 (STROBE).<sup>32</sup>

1  
2  
3  
4  
5  
6  
7  
8  
9  
10  
11  
12  
13  
14  
15  
16  
17  
18  
19  
20  
21  
22  
23  
24  
25  
26  
27  
28  
29  
30  
31  
32  
33  
34  
35  
36  
37  
38  
39  
40  
41  
42  
43  
44  
45  
46  
47  
48  
49  
50  
51  
52  
53  
54  
55  
56  
57  
58  
59  
60

130 All patients with T2D attending their routine diabetes clinics in 17 randomly selected  
131 primary health care centres in Muscat were approached to take part in the study.  
132 Inclusion criteria were age >18 years and being followed up in a diabetes clinic for >2  
133 years and ability to provide informed consent. For illiterate participants, informed  
134 consents were taken from their spouse, son, daughter or other close family member.  
135 Participants with type 1 diabetes, newly diagnosed (<6 months) or who had difficulty in  
136 performing any physical activity, including history of myocardial infarction of <6  
137 months and multiple organ failure, were excluded.

### 138 **Data sources/ measurement**

139 In addition to recording physiological data [Body Mass Index (BMI), medication,  
140 duration of diabetes, blood pressure (BP), lipid profile, and comorbidities coinciding  
141 with diabetes] from the electronic health system, a multi-section questionnaire with a  
142 range of answers in closed format was administered by a trained interviewer. The  
143 following information was collected:

144 *Socio-demographic data:* included gender, age, marital status, education, household  
145 income, and employment.

146 *Perceptions on stage of change in physical activity:* Based on the trans-theoretical  
147 theory of behaviour change,<sup>33</sup> subjects were asked to identify their perceived stage of  
148 change in physical activity. Participants were to select “Maintenance stage” if they were  
149 participating in moderate physical activity five or more times per week or in vigorous  
150 activity three to five times per week longer than six consecutive months or select  
151 “Action stage” if less than six months. “Preparation stage” was selected by subjects who  
152 were thinking about starting exercise such as walking in the near future, or doing  
153 vigorous activity less than three times per week, or moderate activity less than five  
154 times per week. Contemplation stage “getting ready” was selected by subjects who were

1  
2  
3  
4  
5  
6  
7  
8  
9  
10  
11  
12  
13  
14  
15  
16  
17  
18  
19  
20  
21  
22  
23  
24  
25  
26  
27  
28  
29  
30  
31  
32  
33  
34  
35  
36  
37  
38  
39  
40  
41  
42  
43  
44  
45  
46  
47  
48  
49  
50  
51  
52  
53  
54  
55  
56  
57  
58  
59  
60

155 thinking about starting exercise or walk in the next six months. Subjects who were not  
156 thinking about starting any PA in the near future selected pre-contemplation stage “not  
157 ready”.

158 *CDC questionnaire on barriers to leisure PA:*

159 An English to Arabic translated CDC questionnaire “Barriers to Being Active” was  
160 used in a study in Saudi Arabia<sup>14</sup> with 21 questions on seven barriers (lack of time, lack  
161 of social support, lack of energy, lack of willpower, fear of injury, lack of skill and lack  
162 of resources). Permission to use the questionnaire was obtained from the lead author on  
163 November 24, 2014  
164 (<https://www.ncbi.nlm.nih.gov/pmc/articles/PMC2813614/figure/F0001/>). However, in  
165 that tool no statements on religion or environment as possible barriers to PA were  
166 included. To address this gap and to formulate robust items on these topics we  
167 undertook several procedures. Literature search was conducted to identify possible  
168 content for the new items from similar studies in neighbour countries with similar socio-  
169 economical characteristics.<sup>28 29</sup> Potential religious barriers considered questions on  
170 religious beliefs restricting PA, accepted clothing for PA and religious perceptions on  
171 PA.<sup>14 25 26</sup> Potential environmental barriers included questions on extreme weather  
172 conditions, physical activity in summer time and availability of appropriate environment  
173 for PA.<sup>16 25</sup> Content and face validity of the questionnaire were assessed by our  
174 investigatory team and draft questions were then discussed with a sample of patients  
175 prior to field testing and adjustments were made to ease comprehension and ensure  
176 translation to Arabic was appropriate.

177 A set of three related questions (total of 27 questions) presented in random order within  
178 the questionnaire represented one barrier category. A scoring system<sup>31</sup> was used to  
179 indicate how likely each statement/item was considered to be a barrier (very likely=3,  
180 somewhat likely=2, somewhat unlikely=1, very unlikely=0). Scores of the three theme-

1  
2  
3  
4  
5  
6  
7  
8  
9  
10  
11  
12  
13  
14  
15  
16  
17  
18  
19  
20  
21  
22  
23  
24  
25  
26  
27  
28  
29  
30  
31  
32  
33  
34  
35  
36  
37  
38  
39  
40  
41  
42  
43  
44  
45  
46  
47  
48  
49  
50  
51  
52  
53  
54  
55  
56  
57  
58  
59  
60

181 related questions were added up to provide a total for each category of barriers. Possible  
182 scores for each barrier category ranged from 0-9. A score of  $\geq 5$  was considered as an  
183 important barrier to overcome.<sup>31</sup> A copy of the used (Arabic & English) questionnaire  
184 can be found in online supplementary material (1&2).

185 To ensure common understanding and acceptability, an interview recording was  
186 undertaken in Muscat in 25 randomly selected adult with type 2 diabetes (population of  
187 interest) outside the sampled health centres of the study. Results were discussed and  
188 reviewed by the investigation team and an independent statistician.

189 Based on the data from the current study, the scale quality (27 item study questionnaire)  
190 including internal consistency reliability measures were investigated through the use of  
191 factor analysis using SPSS v22 and supported by McDonald's coefficient omega using  
192 the free and open source R.<sup>34 35</sup>

### 193 **Study size**

194 Power analysis was performed to estimate the prevalence of meeting PA  
195 recommendations in adult population with T2D in a parallel study conducted in the  
196 same population.<sup>36</sup> We assumed that meeting PA recommendation is at least in part  
197 facilitated by reporting fewer barriers to PA<sup>37</sup> and used an estimated 15% prevalence of  
198 adequate PA in patients with diabetes, as reported in the 2008 Oman World Health  
199 Survey (OWHS).<sup>38</sup> Using 95% confidence limits, a response rate of 80%, and a  
200 precision of +/-4%, and smallest expected frequency of 15%, the calculated sample size  
201 was ~300 participants across primary health centres in Muscat region, the capital of  
202 Oman.



1  
2  
3  
4  
5  
6  
7  
8  
9  
10  
11  
12  
13  
14  
15  
16  
17  
18  
19  
20  
21  
22  
23  
24  
25  
26  
27  
28  
29  
30  
31  
32  
33  
34  
35  
36  
37  
38  
39  
40  
41  
42  
43  
44  
45  
46  
47  
48  
49  
50  
51  
52  
53  
54  
55  
56  
57  
58  
59  
60

## 203 Training

204 A multidisciplinary team of two nurses, one senior dietician, one medical orderly and  
205 two doctors were recruited for data collection. A one day training on administration of  
206 the questionnaire was delivered by the national focal point on PA in Oman Ministry of  
207 Health. Data entry, cross-checking and cleaning was done through Epi Info™ 7 by an  
208 independent personnel. Entered data was transferred to SPSS v22 for analysis and  
209 subsequent results.

## 210 Statistical methods

211 Descriptive statistics were expressed as percentages and mean (SD), median (quartiles)  
212 to describe the study sample characteristics. Sum of scores from the three related  
213 questions per category (range from 0-9) were expressed as median (LQ, UQ).  
214 Correlations between the sum of scores of the nine barrier categories were tested.  
215 Furthermore, data were dichotomised to scores  $<5$  and  $\geq 5$  to determine the highly  
216 reported barriers as advised in the CDC questionnaire and practised in a study in Saudi  
217 Arabia.<sup>31</sup> Chi-square analysis was carried out to identify with the distribution of the  
218 high barrier scores ( $\geq 5$ ) across the independent sociodemographic factors including  
219 gender (male vs female); age (to ensure sufficient power and adequate numbers for  
220 further statistical analysis the population was divided by the mean age  $\leq 57$  vs  $< 57$   
221 years); marital status (currently unmarried vs married); education (those unable to read  
222 or write (“uneducated”) vs. those having attended primary school or beyond  
223 (“educated”); household income ( $<500$  vs  $\geq 500$  Omani rials - ‘OR’); and employment  
224 (unemployed, including those retired vs employed). Self-reported stage of change in PA  
225 was expressed as one of two categories: inactive if reporting “pre-contemplation” or  
226 “contemplation” and potentially active if reporting being at “preparation”, “action”, or



1  
2 227 “maintenance” stages of PA. Corrected P-values (Yate’s continuity) were reported for  
3  
4 228 high barrier scores against the studied independent variables.

5  
6 229 Principal components analysis (PCA) was performed to identify composite scores for  
7  
8 230 the components underlying the items/questions in the study scale. A nine factor solution  
9  
10 231 was used to investigate the contributions of the 27 item/questions to the nine barrier  
11  
12 232 categories.<sup>39</sup> Furthermore, factor loading matrix was examined using Oblimin rotation<sup>40</sup>  
13  
14  
15 233 where correlations between the extracted components were obtained.

## 18 19 234 **RESULTS**

### 20 21 235 **Socio-demographic**

22  
23 236 Out of 312 patients approached, 305 (98%) completed the questionnaire. Slightly more  
24  
25 237 females were represented in this sample (57.4%) than males. The population was  
26  
27 238 slightly older with mean (SD) age of 57(10.8) years. Additionally, more than two-thirds  
28  
29 239 being married (78.8%) and just about half unable to read or write (48.9%). More than a  
30  
31 240 third of the study population (39.3%) reported household income of <500 OR (less than  
32  
33 241 national average)<sup>41</sup> and the majority (77%) reported unemployment (including  
34  
35 242 retirement). More males than females were educated (70% vs 37%) and employed (45%  
36  
37 243 vs 7%) (Table 1).

### 38 39 244 **Physiological status**

40  
41 245 Median (LQ, UQ) duration of diabetes in this population was 6.0 (4.0, 10.0) years. The  
42  
43 246 majority of the participants had hypertension (n=217, 71%) or/and hyperlipidaemia  
44  
45 247 (n=189, 62%) coinciding with their diabetes. All of them were using anti-hypertensive  
46  
47 248 or/and lipid lowering medications as appropriate. More than three-quarters of those  
48  
49 249 taking anti-hypertensives (78%) and two-thirds of those using lipid lowering drugs  
50  
51 250 (66%) had blood pressure (BP) readings and fasting serum cholesterol within target  
52  
53  
54  
55  
56  
57  
58  
59  
60

251 levels (BP<140/80 mmHg and fasting serum cholesterol of <5mmol/l).<sup>42</sup> Fifteen percent  
 252 (n=45) were controlling their diabetes by diet alone versus 85% (n=260) on oral anti-  
 253 hypoglycaemic medications, in which 25% (n=75) were additionally on insulin. Mean  
 254 (SD) BMI was 31.0 (6.0) kg/m<sup>2</sup> where 89% (n=271) had BMI >25kg/m<sup>2</sup> in which 50%  
 255 (n=153) were obese (BMI>30 kg/m<sup>2</sup>) and 39% (n=118) were overweight (BMI>25-  
 256 29.99 kg/m<sup>2</sup>). Glycated haemoglobin HbA1c was >7% (>48 mmol/mol) in more than  
 257 half of the population (58%) indicating poor diabetes control (Table 1).

### 258 Self-reported stages of PA

259 Only 17% (n=52) of participants considered themselves actively participating in regular  
 260 moderate or vigorous PA (22% of males vs 13% of females). Of the remainder, the  
 261 majority reported being “not ready” (37%), “getting ready” (31%) or in “preparation”  
 262 (15%) (Table 1).

263 **Table 1: Selected participants characteristics**

| Population characteristics   | Total population<br>n=305(100%) |
|------------------------------|---------------------------------|
| <b>Gender</b>                |                                 |
| Male                         | 130(42.6)                       |
| Female                       | 175(57.4)                       |
| <b>Age (years)</b>           |                                 |
| ≤57                          | 155(51)                         |
| >57                          | 150(49)                         |
| <b>Marital status</b>        |                                 |
| Currently unmarried          | 65(21)                          |
| Currently married            | 240(79)                         |
| <b>Education</b>             |                                 |
| Not educated                 | 149(49)                         |
| Educated                     | 156(51)                         |
| <b>Income</b>                |                                 |
| <500 OR                      | 120(39)                         |
| ≥500 OR                      | 185(61)                         |
| <b>Employment</b>            |                                 |
| Not employed                 | 234(77)                         |
| Employed                     | 71(23)                          |
| <b>Physiological</b>         |                                 |
| Duration of diabetes (years) | Median (LQ, UQ)                 |

|                                                   |                                       |          |     |
|---------------------------------------------------|---------------------------------------|----------|-----|
|                                                   |                                       | 6(4, 10) |     |
| <b>Self-reported comorbidities*</b>               |                                       |          |     |
|                                                   | Yes                                   | 277(91)  | 265 |
|                                                   | No                                    | 28 (9)   | 266 |
| <b>Current medication</b>                         |                                       |          |     |
|                                                   | Anti-HTN                              | 217(71)  | 269 |
|                                                   | Lipid lowering drugs                  | 189(62)  | 270 |
|                                                   | Oral-hypoglycaemic drugs              | 260(85)  | 271 |
|                                                   | Oral-hypoglycaemic drugs with Insulin | 75(25)   | 272 |
|                                                   | Diet control                          | 45(15)   | 273 |
| <b>Blood pressure (systolic/diastolic) mmHg**</b> |                                       |          |     |
|                                                   | Within target (<140/<80)              | 237(78)  | 277 |
|                                                   | High (≥140/≥80)                       | 68(22)   | 278 |
| <b>Fasting lipid profile (mmol/l)**</b>           |                                       |          |     |
|                                                   | Cholesterol within target (< 5.0)     | 201(66)  | 281 |
|                                                   | Cholesterol high (≥5.0)               | 104(34)  | 282 |
| <b>Body Mass Index (kg/m2)**</b>                  |                                       |          |     |
|                                                   | Healthy weight range (18.5-24.99)     | 34(11)   | 285 |
|                                                   | Overweight (>25-29.99)                | 118(39)  | 286 |
|                                                   | Obese (>30)                           | 153(50)  | 287 |
| <b>HbA1c(%)**(&gt;48 mmol/mol)</b>                |                                       |          |     |
|                                                   | Normal ≤7%                            | 127(42)  | 290 |
|                                                   | High >7%                              | 178(58)  | 291 |
| <b>Self-reported stages of PA</b>                 |                                       |          |     |
|                                                   | Not ready (Pre-contemplation)         | 112(37)  | 293 |
|                                                   | Getting ready(contemplation)          | 95(31)   | 294 |
|                                                   | Preparation                           | 46(15)   | 295 |
|                                                   | Action                                | 14(5)    | 296 |
|                                                   | Maintenance                           | 38(12)   | 297 |
|                                                   |                                       |          | 298 |
|                                                   |                                       |          | 299 |

\*Reported hypertension, hyperlipidaemia, thyroid dysfunction or any other chronic condition coinciding with diabetes.  
\*\*Oman diabetes mellitus management guidelines (2015)<sup>42</sup>

### 300 CDC questionnaire on barriers to leisure PA

301 For the 27 items/questions scale, McDonald's coefficient Omega was equal to 0.750  
 302 indicating moderate reliability of the scale.<sup>39</sup> Further, PCA analysis with 9 components  
 303 solution generally supported the previous found subscales (three questions per barrier  
 304 category) in barriers to performing PA mainly component 2, 4, 5, 6, and 9 representing  
 305 fear from injury, environmental barriers, religious barriers, lack of willpower, and lack  
 306 of resources respectively (see supplementary materials 3). However, cross contributions  
 307 were evident in four out of the nine extracted components namely component 1 (lack of  
 308 willpower, time, energy and skills), component 3 (lack of time and energy), component

1  
2  
3  
4  
5  
6  
7  
8  
9  
10  
11  
12  
13  
14  
15  
16  
17  
18  
19  
20  
21  
22  
23  
24  
25  
26  
27  
28  
29  
30  
31  
32  
33  
34  
35  
36  
37  
38  
39  
40  
41  
42  
43  
44  
45  
46  
47  
48  
49  
50  
51  
52  
53  
54  
55  
56  
57  
58  
59  
60

309 7 (lack of social support and skills), and component 8 (lack of social support and  
310 energy).

311 Each of the subscales for the nine studied barriers had good reliability [McDonald's  
312 coefficient Omega was equal to 0.900]. Based on this, further results are presented  
313 using sum scores.

314 The majority of the population, 97.7% (n=298), reported at least one barrier to  
315 performing leisure physical activity median (LQ, UQ) was 6 (4, 7). Population  
316 distributions were not normal across all reported barrier categories. Median sum scores  
317 were all <5 as illustrated in (Figure 1). Except for reporting lack of willpower and lack  
318 of resources, 75% of sum scores of other reported barriers were  $\leq 5$ .

319  
320  
321  
322  
323  
324  
325  
326  
327  
328  
329  
330  
331  
332  
333  
334  
335

---

INSERT FIGURE 1 ABOUT HERE

---

322 Categorizing barrier scores to  $<5$  and  $\geq 5$  (significant barrier) highlighted that 'lack of  
323 willpower' (n=139), 'lack of resources' (n=93) and 'lack of social support' (n=89) were  
324 the most frequently reported 'significant barriers' to physical activity (Figure 2).  
325 Barriers found to be significant in both males and females were lack of willpower  
326 (41.5% m: 48.6% f) and lack of resources (32.3% m: 29.1% f). In addition, lack of time  
327 in males (26.9%) and lack of social support in females (35.4%) were also noteworthy  
328 (Table 2).

329  
330  
331  
332  
333  
334  
335

---

INSERT FIGURE 2 ABOUT HERE

---

332 Correlations between the sum scores of the nine studied barriers were generally weak  
333 ( $R < 0.200$ ). Positive and significant correlations of  $>0.300$  were noted among lack of  
334 energy with lack of time; lack of skill with lack of social support; lack of energy and  
335 lack of willpower; lack of skills with lack of willpower; and fear of injury with lack of

|                        | Lack of time | Lack of social support | Lack of energy | Lack of willpower | Fear of injury | Lack of skill | Lack of resources | Religious barriers | Environmental barriers |
|------------------------|--------------|------------------------|----------------|-------------------|----------------|---------------|-------------------|--------------------|------------------------|
| Lack of time           | 1.000        | .134*                  | .464*          | .118*             | -.116*         | .035          | .013              | -.092              | .013                   |
| Lack of social support | .134*        | 1.000                  | .125*          | .288*             | .262*          | .430*         | .083              | .011               | .039                   |
| Lack of energy         | .464*        | .125*                  | 1.000          | .306*             | -.013          | .178*         | .171*             | -.070              | .099                   |
| Lack of willpower      | .118*        | .288*                  | .306*          | 1.000             | .058           | .497*         | .260*             | -.112              | .053                   |
| Fear of injury         | -.116*       | .262*                  | -.013          | .058              | 1.000          | .338*         | -.218*            | .032               | -.090                  |
| Lack of skill          | .035         | .430*                  | .178*          | .497*             | .338*          | 1.000         | .182*             | -.052              | .005                   |
| Lack of resources      | .013         | .083                   | .171*          | .260*             | -.218*         | .182*         | 1.000             | .038               | .281*                  |
| Religious barriers     | -.092        | .011                   | -.070          | -.112             | .032           | -.052         | .038              | 1.000              | .007                   |
| Environmental barriers | .013         | .039                   | .099           | .053              | -.090          | .005          | .281*             | .007               | 1.000                  |

336 skills (Table 2). Interestingly, no significant correlations were seen within the religious  
 337 and environmental barriers except for one weak significant positive correlation between  
 338 lack of resources and environmental barriers.

339 **Table 2: Correlations between sum scores of barrier categories**

340 \*P-value <0.050

341  
 342 Distributions of significant high barrier score ( $\geq 5$ ) across the studied sociodemographic  
 343 factors and self-reported stages of change in PA differed among the nine barrier  
 344 categories: “Lack of time” was frequently highly scored by males, younger adults and  
 345 those who were married, employed or educated. Additionally, “Lack of social support”  
 346 was highly scored by females and “Lack of energy” by employed, or educated adults.  
 347 However, “Lack of willpower” was highly scored by individuals with lower income, or  
 348 at inactive stages of PA. Moreover, “Fear of injury” was highly scored by older adults,  
 349 unemployed, uneducated, or individuals reporting in-active stages of PA. Furthermore,  
 350 “Lack of skills” was highly scored by females, younger adults, and unemployed or  
 351 uneducated. “Lack of resources” on the other hand, was frequently highly scored by  
 352 married adults or with lower income. It is notable that the religious and environmental

1  
2 353 barriers had no significant different distributions across any of the studied factors (Table  
3  
4 354 3).  
5  
6  
7  
8  
9  
10  
11  
12  
13  
14  
15  
16  
17  
18  
19  
20  
21  
22  
23  
24  
25  
26  
27  
28  
29  
30  
31  
32  
33  
34  
35  
36  
37  
38  
39  
40  
41  
42  
43  
44  
45  
46  
47  
48  
49  
50  
51  
52  
53  
54  
55  
56  
57  
58  
59  
60

For peer review only

**Table 3: Distribution of high barrier scores ( $\geq 5$ ) to leisure physical activity in adult population with type 2 diabetes across sociodemographic variables and self-reported stages of change in physical activity (n=305).**

| (%) Scores $\geq 5$ | Lack of time | Lack of social support | Lack of energy | Lack of willpower | Fear of injury | Lack of skills | Lack of resources | Religious barriers | Environmental barriers |
|---------------------|--------------|------------------------|----------------|-------------------|----------------|----------------|-------------------|--------------------|------------------------|
| Gender:             |              |                        |                |                   |                |                |                   |                    |                        |
| Male                | 26.6         | 20.8                   | 21.5           | 41.5              | 24.6           | 13.1           | 32.3              | 3.8                | 10.0                   |
| Female              | 15.4         | 35.4                   | 16.0           | 48.6              | 26.3           | 28.0           | 29.1              | 4.6                | 13.1                   |
| Corrected $\chi^2$  | 5.4          | 7.1                    | 1.2            | 1.2               | 0.04           | 8.9            | 0.2               | 0.001              | 0.4                    |
| (P-value)           | (0.020)*     | (0.008)*               | (0.278)        | (0.270)           | (0.843)        | (0.003)*       | (0.640)           | (0.981)            | (0.508)                |
| Age:                |              |                        |                |                   |                |                |                   |                    |                        |
| $\leq 57$           | 27.7         | 26.5                   | 21.3           | 45.8              | 18.7           | 16.1           | 33.5              | 4.5                | 12.3                   |
| $> 57$              | 12.7         | 32.0                   | 15.3           | 45.3              | 32.7           | 27.3           | 27.3              | 4.0                | 11.3                   |
| Corrected $\chi^2$  | 9.7          | 0.9                    | 1.4            | 0.0               | 7.1            | 5.0            | 1.1               | 0.00               | 0.0                    |
| (P-value)           | (0.002)*     | (0.347)                | (0.232)        | (1.000)           | (0.008)*       | (0.025)*       | (0.292)           | (1.000)            | (0.942)                |
| Marital status:     |              |                        |                |                   |                |                |                   |                    |                        |
| Unmarried           | 10.8         | 35.4                   | 16.9           | 43.1              | 30.8           | 24.6           | 18.5              | 7.7                | 13.8                   |
| Married             | 22.9         | 27.5                   | 18.8           | 46.3              | 24.2           | 20.8           | 33.8              | 3.3                | 11.3                   |
| Corrected $\chi^2$  | 3.9          | 1.2                    | 0.0            | 0.1               | 0.9            | 0.2            | 4.9               | 1.4                | 0.1                    |
| (P-value)           | (0.047)*     | (0.277)                | (0.875)        | (0.753)           | (0.356)        | (0.626)        | (0.026)*          | (0.231)            | (0.720)                |
| Employment:         |              |                        |                |                   |                |                |                   |                    |                        |
| Un-employed         | 12.4         | 31.6                   | 14.5           | 47.0              | 29.5           | 25.6           | 31.6              | 4.7                | 11.5                   |
| Employed            | 46.5         | 21.1                   | 31.0           | 40.8              | 12.7           | 8.5            | 26.8              | 2.8                | 12.7                   |
| Corrected $\chi^2$  | 37.0         | 2.4                    | 8.8            | 0.6               | 7.2            | 8.5            | 0.4               | 0.1                | 0.0                    |
| (P-value)           | (<0.001)*    | (0.120)                | (0.003)*       | (0.437)           | (0.007)*       | (0.004)*       | (0.527)           | (0.740)            | (0.960)                |
| Education:          |              |                        |                |                   |                |                |                   |                    |                        |
| Un-educated         | 11.4         | 33.6                   | 13.4           | 45.6              | 35.6           | 28.2           | 29.5              | 6.0                | 10.7                   |
| Educated            | 28.8         | 25.0                   | 23.1           | 45.5              | 16.0           | 15.4           | 31.4              | 2.6                | 12.8                   |
| Corrected $\chi^2$  | 13.2         | 2.3                    | 4.1            | 0.0               | 14.2           | 6.6            | 0.1               | 1.5                | 0.1                    |

1  
2  
3  
4  
5  
6  
7  
8  
9  
10  
11  
12  
13  
14  
15  
16  
17  
18  
19  
20  
21  
22  
23  
24  
25  
26  
27  
28  
29  
30  
31  
32  
33  
34  
35  
36  
37  
38  
39  
40  
41  
42  
43  
44  
45  
46  
47  
48  
49

|                             |           |         |          |          |           |          |          |         |         |
|-----------------------------|-----------|---------|----------|----------|-----------|----------|----------|---------|---------|
| (P-value)                   | (<0.001)* | (0.129) | (0.042)* | (1.0)    | (<0.001)* | (0.010)* | (0.816)  | (0.162) | (0.700) |
| Income:                     |           |         |          |          |           |          |          |         |         |
| <500                        | 16.7      | 26.7    | 21.7     | 54.2     | 20.8      | 23.3     | 40.0     | 5.8     | 8.3     |
| >=500                       | 22.7      | 30.8    | 16.2     | 40.0     | 28.6      | 20.5     | 24.3     | 3.2     | 14.1    |
| Corrected $\chi^2$          | 1.3       | 0.4     | 1.1      | 5.3      | 1.9       | 0.2      | 7.7      | 0.6     | 1.8     |
| (P-value)                   | (0.257)   | (0.516) | (0.294)  | (0.021)* | (0.163)   | (0.663)  | (0.005)* | (0.422) | (0.183) |
| Self-reported stages of PA: |           |         |          |          |           |          |          |         |         |
| Not active                  | 18.4      | 28.5    | 17.9     | 50.7     | 31.9      | 24.2     | 29.5     | 4.3     | 13.5    |
| Active                      | 24.5      | 30.6    | 19.4     | 34.7     | 12.2      | 16.3     | 32.7     | 4.1     | 8.2     |
| Corrected $\chi^2$          | 1.2       | 0.1     | 0.0      | 6.2      | 12.5      | 2.0      | 0.2      | 0.00    | 1.4     |
| (P-value)                   | (0.276)   | (0.808) | (0.873)  | (0.012)* | (<0.001)* | (0.161)  | (0.667)  | (1.0)   | (0.244) |

\* Significant at P<0.050

For peer review only



## 1 DISCUSSION

2 Despite evidence on the effectiveness of meeting PA levels in the management of T2D,  
3 and associated cardiovascular risk factors,<sup>6 7</sup> PA is poorly addressed in routine diabetes  
4 care.<sup>43</sup> Low PA levels in populations with T2D are consistently reported in western  
5 countries, for example, USA<sup>44</sup> as well as Arabic speaking countries namely Oman,  
6 Saudi Arabia and Lebanon.<sup>2 45 46</sup> Addressing perceived barriers to performing  
7 recommended PA levels in this population is crucial for planning effective PA  
8 promoting interventions.

9 Within a series of formative studies to inform a culturally congruent PA intervention in  
10 diabetes care,<sup>47</sup> this study has looked at perceived barriers to performing leisure time  
11 physical activity in an adult population with T2D attending primary care using an  
12 adapted CDC questionnaire translated to Arabic language.<sup>14</sup>

13 The current findings relating to willpower, resources and social support were also  
14 reported as the top three barriers to PA in the Saudi population attending primary care  
15 by AlQuaiz (2009).<sup>14</sup> In the West, USA in particular, the strongest reported barriers to  
16 physical activity among adults with T2D were pain (41%), followed by lack of  
17 willpower (27%), and poor health (21%).<sup>48</sup>

18 In the current study, lack of willpower was significantly highly reported by individuals  
19 from low income households. This finding is similar to a Canadian study which  
20 reported a negative association between financial position and on intention to participate  
21 in leisure-time physical activity in adult population with T2D in Canada.<sup>49</sup> Additionally  
22 in a study in USA, older individuals with low income who were found to be depressed  
23 had had low participation in social activities had less odds of engaging in PA.<sup>50</sup> None  
24 the less, more evidence is needed to explain how income alters the willpower for  
25 performing leisure PA in Arabic speaking countries namely Oman. Comparably, lack

1  
2  
3  
4  
5  
6  
7  
8  
9  
10  
11  
12  
13  
14  
15  
16  
17  
18  
19  
20  
21  
22  
23  
24  
25  
26  
27  
28  
29  
30  
31  
32  
33  
34  
35  
36  
37  
38  
39  
40  
41  
42  
43  
44  
45  
46  
47  
48  
49  
50  
51  
52  
53  
54  
55  
56  
57  
58  
59  
60

of willpower was more likely to be reported by individuals at inactive stages of physical activity (pre-contemplation or contemplation stages of physical activity) than those in active stages. Progressive stages of behavioural change according to the trans-theoretical model were direct correlates to PA in a review article by Trost (2002)<sup>51</sup> and direct determinants in another by Van Stralen (2009).<sup>52</sup> This finding supports the need for programs to help raise self-willpower/determination through stepped process of behaviour change from inactive (pre-contemplation) to active stages of PA (action and maintenance).<sup>53</sup> Interestingly, fear of injury was the only other reported barrier significantly different between individuals at inactive vs active stages of change in PA. This could be explained by possible physical constraints pertaining to older age<sup>50</sup> and existing comorbidities in the current study population triggering fear of injuries associated with PA.

Limited resources including high cost and limited facilities for PA have been reported as significant barriers to PA across different cultures.<sup>20 22</sup> In the current study, limited resources were reported as significant by individuals who were married and those with low income. Married individuals could have more financial commitments to their families especially in the Gulf Cooperation Council countries where extended families are common.<sup>54</sup> This may alter an individual's priorities for house-hold income expenditure. Low income was similarly reported as a barrier in a Saudi population, possibly due to the perceived high cost of utilising PA facilities.<sup>14</sup> This may reflect a narrow view on what constitutes PA and a misconception that expensive equipment is required. Hence, irrespective of culture, interventions promoting cost neutral PA such as walking in populations would be highly desirable to overcome this barrier.<sup>47 55</sup>

Lack of social support was frequently reported by females in this study. Meeting cultural norms and social expectations related to safety, security and conservative dress mainly for females were reported as barriers to PA in South Asian (Pakistani and

1  
2 52 Indian) British populations<sup>18 21</sup> and populations in Arabic countries such as Qatar.<sup>56</sup>  
3  
4 53 Evaluation of interventions to provide the necessary social support and networks to PA  
5  
6 54 specifically for women with T2D, particularly in the countries of the Gulf Cooperation  
7  
8 55 Council are warranted. Activities including group-based activities and buddying,<sup>57-59</sup>  
9  
10 56 are worth further investigation.  
11  
12  
13 57 Other reported barriers such as fear of injury and lack of skills varied across subgroups  
14  
15 58 in particular, older, unemployed, and uneducated individuals. Older individuals with  
16  
17 59 T2D are more vulnerable to have poor vision and osteoarthritic changes that may cause  
18  
19 60 fall and injuries.<sup>60</sup> Moreover the negative influence of pain to PA in older population  
20  
21 61 with T2D was reported in western countries,<sup>48</sup> and hence potential barriers to  
22  
23 62 individuals' participation. These results suggest that programs to promote PA should be  
24  
25 63 individualized for type, frequency and intensity of PA and incorporate safety measures  
26  
27 64 to prevent PA induced pain and injuries in older individuals.<sup>61</sup>  
28  
29  
30  
31 65 Lack of time on the other hand, has been a highly cited barrier to PA in the general  
32  
33 66 population as well as populations with diabetes.<sup>15-18 21 22 48 62</sup> However, unlike the study  
34  
35 67 by Alquaiz (2009), significant scores for lack of time in this study were higher in males  
36  
37 68 compared to females<sup>14</sup> along-with a lack of energy, which may be a reflection of the fact  
38  
39 69 that more males than females were educated and employed. This perception of 'lack of  
40  
41 70 time', in addition to family and social commitments may jeopardized their time for PA  
42  
43 71 especially if individuals were younger and married. This discussion highlights the  
44  
45 72 importance of changing people's perceptions of PA but also consideration of  
46  
47 73 opportunities in other PA domains namely work and travel that could enable individuals  
48  
49 74 with less leisure time to increase overall PA and behaviour.  
50  
51  
52  
53  
54 75 Factors which are independent of an individual's decision-making, such as environment  
55  
56 76 and religion had no significant associations in the current study despite the hot weather  
57  
58 77 during data collection of this study in April/May. These null results, may be real or may  
59  
60

1  
2 78 be due to the wording of the questions and their interpretation. To address these gaps in  
3  
4 79 the literature, a qualitative exploration of possible environmental, including seasonal  
5  
6 80 variations, and religious factors affecting PA performance may be warranted.  
7

8  
9 81 Moreover, PCA showed cross contribution of items/questions within lack of willpower,  
10  
11 82 time, energy and skills indicating doubtful responses. Similarly inputs from questions  
12  
13 83 on lack of social support and lack of skills and energy were mixed. Future  
14  
15 84 questionnaires on barriers to performing PA, especially in the Arabic speaking  
16  
17 85 countries, should consider more specific questions.  
18

19  
20 86 Additionally, results of this study cannot be generalised across all regions in Oman.  
21  
22 87 More information is required from rural Omani communities where perceptions on PA  
23  
24 88 may be different. Despite the excellent scale reliability measures in the current data, the  
25  
26 89 results cannot be generalized due to possible differences in scale quality across various  
27  
28 90 data.<sup>39</sup> Despite efforts to minimize potential bias due to the subjective nature of self-  
29  
30 91 reports, accuracy of outcomes cannot be fully ensure. Moreover, due to the cross-  
31  
32 92 sectional design of this study, causal inferences cannot be drawn.  
33  
34

35  
36 93 Finally, future attempts to explore barriers to PA should equally include work and travel  
37  
38 94 domains to cater for diversities in both PA behaviour and sedentary lifestyle across  
39  
40 95 subgroups of adults with T2D.  
41  
42

## 43 44 96 **CONCLUSION**

45  
46  
47 97 This study identified lack of willpower, low resources and low social support  
48  
49 98 (especially in females) as the most common barriers to performing leisure PA. The  
50  
51 99 current findings can be used to inform the design of physical activity interventions for  
52  
53 100 testing in clinical trials. The specific areas which might be usefully included to address  
54  
55 101 barriers to performing PA are a) assessment of individuals' readiness to change b) low  
56  
57 102 cost options for PA resources and social support c) approaches aimed at increasing  
58  
59  
60

1  
2 103 individuals' understanding of what constitutes PA and d) methods that are flexible and  
3  
4 104 tailored to the specific needs of subgroups of adults with T2D. In addition, approaches  
5  
6 105 that enhance self-efficacy (and will power) and social support should be included.  
7  
8

## 9 106 **ETHICAL CONSIDERATION**

10  
11  
12 107 Ethical approval was obtained from the Regional Research Committee in Muscat, Oman  
13  
14 108 Ministry of Health. All eligible participants provided informed consent prior to data  
15  
16 109 collection. For illiterate individuals, consents to participate in this study were provided  
17  
18 110 by their accompanying support member (spouse, son or daughter).  
19  
20

## 21 111 **COMPETING INTERESTS**

22  
23  
24  
25 112 The authors declare that they have no competing interests.  
26  
27

## 28 113 **FUNDING**

29  
30  
31  
32 114 The Oman Ministry of Health funded this project as part of a PhD grant offered to the  
33  
34 115 corresponding author.  
35  
36

## 37 116 **AUTHORS' CONTRIBUTION**

38  
39  
40 117 TS is the principal investigator in charge of the project. SM, YA, EB, AC and ASA  
41  
42 118 have all been involved in designing the intervention and the evaluation. TS prepared the  
43  
44 119 initial draft of the manuscript and all other authors have contributed. All authors have  
45  
46 120 critically reviewed and approved the final version of the manuscript.  
47  
48  
49

## 50 121 **ACKNOWLEDGEMENTS**

51  
52  
53 122 We would like to thank Dr. Ahmed Al-Qasmi, Director General of Directorate of  
54  
55 123 Planning and Dr. Fatma Al-Ajmi, Director General of Health Services, Muscat in Oman  
56  
57  
58  
59  
60

1  
2 124 Ministry of Health for their support and constant supervision. Additionally, special  
3  
4 125 thanks to Dr. Adil Al-Wahaibi for his assistance with the study statistics.

5  
6 126 **DATA SHARING STATEMENT** No additional data are available.

7  
8  
9  
10 127 **REFERENCES**

- 11  
12  
13 128 1. International Diabetes Federation. IDF DIABETES ATLAS-7TH EDITION  
14 129 Brussels, Belgium; 2015 [Available from: <http://www.diabetesatlas.org>  
15 130 May 2016.
- 16 131 2. Al Riyami A, Abd Elaty MA, Morsi M, et al. Oman World Health Survey: Part 1 - methodology,  
17 132 sociodemographic profile and epidemiology of non-communicable diseases in Oman.  
18 133 *Oman Med J* 2012;27(5):425-43.
- 19 134 3. World Health Organization. Physical activity  
20  
21 135  
22  
23 136 WHO; 2014 [fact sheet]. Available from:  
24 137 <http://www.who.int/mediacentre/factsheets/fs385/en/> accessed 21st May 2014.
- 25 138 4. Badran M, Laher I. Type II Diabetes Mellitus in Arabic-Speaking Countries. *International*  
26 139 *Journal Of Endocrinology* 2012;2012:902873-73. doi: 10.1155/2012/902873
- 27 140 5. Oman Health Vision 2050. 2012.
- 28 141 6. American Diabetes Association. Exercise and type 2 diabetes: American College of Sports  
29 142 Medicine and the American Diabetes Association: Joint Position Statement. *Medicine*  
30 143 *and Science in Sports and Exercise* 2010;42(12):2282-303. doi:  
31 144 10.1249/MSS.0b013e3181eeb61c
- 32 145 7. Di Loreto C, Fanelli C, Lucidi P, et al. Make your diabetic patients walk: long-term impact of  
33 146 different amounts of physical activity on type 2 diabetes. *Diabetes care*  
34 147 2005;28(6):1295-302.
- 35 148 8. World Health Organization. WHO's Global Recommendations on PA for Health 2010  
36 149 [Available from:  
37 150 [http://whqlibdoc.who.int/publications/2010/9789241599979\\_eng.pdf](http://whqlibdoc.who.int/publications/2010/9789241599979_eng.pdf).
- 38 151 9. Heath GW, Parra DC, Sarmiento OL, et al. Evidence-based intervention in physical activity:  
39 152 lessons from around the world. *Lancet* 2012;380(9838):272-81. doi: 10.1016/S0140-  
40 153 6736(12)60816-2
- 41 154 10. Morrato EH, Hill JO, Wyatt HR, et al. Physical activity in U.S. adults with diabetes and at risk  
42 155 for developing diabetes, 2003. *Diabetes care* 2007;30(2):203-09.
- 43 156 11. Colberg SR, Sigal RJ, Fernhall B, et al. Exercise and type 2 diabetes: The American College of  
44 157 Sports Medicine and the American Diabetes Association: Joint position statement.  
45 158 *Diabetes care* 2010;33(12):e147-e67. doi: 10.2337/dc10-9990
- 46 159 12. Arem H, Moore SC, Patel A, et al. Leisure time physical activity and mortality: a detailed  
47 160 pooled analysis of the dose-response relationship. *JAMA internal medicine*  
48 161 2015;175(6):959-67. doi: 10.1001/jamainternmed.2015.0533 [published Online First:  
49 162 2015/04/07]
- 50 163 13. Hallman DM, Mathiassen SE, Gupta N, et al. Differences between work and leisure in  
51 164 temporal patterns of objectively measured physical activity among blue-collar workers.  
52 165 *BMC Public Health* 2015;15(1):976. doi: 10.1186/s12889-015-2339-4
- 53 166 14. AlQuaiz et al. Barriers to a healthy lifestyle among patients attending primary care clinics at  
54 167 a university hospital in Riyadh. *Annals Of Saudi Medicine* 2009;29(1):30-35.



- 1  
2 168  
3 169  
4 170  
5 171  
6 172  
7 173  
8 174  
9 175  
10 176  
11 177  
12 178  
13 179  
14 180  
15 181  
16 182  
17 183  
18 184  
19 185  
20 186  
21 187  
22 188  
23 189  
24 190  
25 191  
26 192  
27 193  
28 194  
29 195  
30 196  
31 197  
32 198  
33 199  
34 200  
35 201  
36 202  
37 203  
38 204  
39 205  
40 206  
41 207  
42 208  
43 209  
44 210  
45 211  
46 212  
47 213  
48 214  
49 215  
50 216  
51 217  
52 218  
53 219  
54  
55  
56  
57  
58  
59  
60
15. Egan AM, Mahmood WAW, Fenton R, et al. Barriers to exercise in obese patients with type 2 diabetes. *QJM: Monthly Journal Of The Association Of Physicians* 2013;106(7):635-38. doi: 10.1093/qjmed/hct075
  16. Korhakangas EE, Alahuhta MA, Husman PM, et al. Motivators and barriers to exercise among adults with a high risk of type 2 diabetes--a qualitative study. *Scandinavian Journal Of Caring Sciences* 2011;25(1):62-69. doi: 10.1111/j.1471-6712.2010.00791.x
  17. Hume C, Dunstan D, Salmon J, et al. Are barriers to physical activity similar for adults with and without abnormal glucose metabolism? *The Diabetes Educator* 2010;36(3):495-502. doi: 10.1177/0145721710368326
  18. Korhakangas EE, Alahuhta MA, Laitinen JH. Barriers to regular exercise among adults at high risk or diagnosed with type 2 diabetes: a systematic review. *Health Promotion International* 2009;24(4):416-27. doi: 10.1093/heapro/dap031
  19. Labrunée M, Antoine D, Vergès B, et al. Effects of a home-based rehabilitation program in obese type 2 diabetics. *Annals Of Physical And Rehabilitation Medicine* 2012;55(6):415-29. doi: 10.1016/j.rehab.2012.06.001
  20. Booth AO, Lowis C, Dean M, et al. Diet and physical activity in the self-management of type 2 diabetes: barriers and facilitators identified by patients and health professionals. *Primary Health Care Research & Development* 2013;14(3):293-306. doi: 10.1017/S1463423612000412
  21. Lawton J, Ahmad N, Hanna L, et al. 'I can't do any serious exercise': barriers to physical activity amongst people of Pakistani and Indian origin with Type 2 diabetes. *Health Education Research* 2006;21(1):43-54.
  22. Mier N, Medina AA, Ory MG. Mexican Americans with type 2 diabetes: perspectives on definitions, motivators, and programs of physical activity. *Preventing chronic disease* 2007;4(2):A24-A24.
  23. Wanko NS, Brazier CW, Young-Rogers D, et al. Exercise preferences and barriers in urban African Americans with type 2 diabetes. *The Diabetes Educator* 2004;30(3):502-13.
  24. Al-Otaibi HH. Measuring stages of change, perceived barriers and self efficacy for physical activity in Saudi Arabia. *Asian Pacific Journal Of Cancer Prevention: APJCP* 2013;14(2):1009-16.
  25. Amin TT, Suleman W, Ali A, et al. Pattern, prevalence, and perceived personal barriers toward physical activity among adult Saudis in Al-Hassa, KSA. *Journal Of Physical Activity & Health* 2011;8(6):775-84.
  26. Ali HI, Baynouna LM, Bernsen RM. Barriers and facilitators of weight management: perspectives of Arab women at risk for type 2 diabetes. *Health & social care in the community* 2010;18(2):219-28. doi: 10.1111/j.1365-2524.2009.00896.x
  27. Berger G, Peerson A. Giving young Emirati women a voice: participatory action research on physical activity. *Health & Place* 2009;15(1):117-24. doi: 10.1016/j.healthplace.2008.03.003
  28. Al-Kaabi J, Al-Maskari F, Saadi H, et al. Physical activity and reported barriers to activity among type 2 diabetic patients in the United arab emirates. *The Review Of Diabetic Studies: RDS* 2009;6(4):271-78. doi: 10.1900/RDS.2009.6.271
  29. Serour M, Alqhenaei H, Al-Saqabi S, et al. Cultural factors and patients' adherence to lifestyle measures. *The British Journal Of General Practice: The Journal Of The Royal College Of General Practitioners* 2007;57(537):291-95.
  30. Alghafri TS, Alharthi SM, Al-Farsi YM, et al. Correlates of physical activity and sitting time in adults with type 2 diabetes attending primary health care in Oman. Under review, 2017.
  31. CDC USA. "Overcoming Barriers to Physical Activity": Centers for Disease Control and Prevention; 2011 [Available from: <https://www.cdc.gov/diabetes/ndep/pdfs/8-road-to-health-barriers-quiz-508.pdf> accessed 16 July 2014.

- 1  
2 220  
3 221  
4 222  
5 223  
6 224  
7 225  
8 226  
9 227  
10 228  
11 229  
12 230  
13 231  
14 232  
15 233  
16 234  
17 235  
18 236  
19 237  
20 238  
21 239  
22 240  
23 241  
24 242  
25 243  
26 244  
27 245  
28 246  
29 247  
30 248  
31 249  
32 250  
33 251  
34 252  
35 253  
36 254  
37 255  
38 256  
39 257  
40 258  
41 259  
42 260  
43 261  
44 262  
45 263  
46 264  
47 265  
48 266  
49 267  
50 268  
51 269  
52 270  
53  
54  
55  
56  
57  
58  
59  
60
32. Enhancing the QUALity and Transparency Of health Research. The Strengthening the Reporting of Observational Studies in Epidemiology (STROBE) Statement: guidelines for reporting observational studies 2017 [Available from: <http://www.equator-network.org/reporting-guidelines/strobe/> accessed 22 January 2017.
33. Martin SB, Morrow JR, Jr., Jackson AW, et al. Variables related to meeting the CDC/ACSM physical activity guidelines. *Med Sci Sports Exerc* 2000;32(12):2087-92. [published Online First: 2000/12/29]
34. Rik Crutzen & Gjalt-Jorn Ygram Peters. Scale quality: alpha is an inadequate estimate and factor-analytic evidence is needed first of all. *Health Psychology Review* 2015:1-6. doi: 10.1080/17437199.2015.1124240
35. R Development Core Team. 2014 [Available from: <http://r-development-core-team.software.informer.com/>.
36. Alghafri TS, Alharthi SM, Al-Farsi YM, et al. Correlates of physical activity and sitting time in adults with type 2 diabetes attending primary health centres in Oman, 2017.
37. Heiss V, Petosa R. Correlates of Physical Activity Among Adults With Type 2 Diabetes: A Systematic Literature Review. *American Journal of Health Education* 2014;45(5):278-87. doi: 10.1080/19325037.2014.933139
38. Ministry of Health Oman. World Health Survey Report, Ministry of Health, Oman. In: studies DoRa, ed. Muscat., 2008.
39. Dunn TJ, Baguley T, Brunnsden V. From alpha to omega: a practical solution to the pervasive problem of internal consistency estimation. *British journal of psychology (London, England : 1953)* 2014;105(3):399-412. doi: 10.1111/bjop.12046 [published Online First: 2014/05/23]
40. Youngblut JM. Comparison of Factor Analysis Options Using the Home/ Employment Orientation Scale. *Nursing research* 1993;42(2):122-24.
41. Ministry of National Economy Oman. Statistical Yearbook 2011. In: Ministry of National Economy O, Muscat, Oman, ed., 2011.
42. Ministry of Health Oman. Diabetes management guidelines In: centre E, ed. Oman: MOH, 2015.
43. Matthews L, Kirk A, MacMillan F, et al. Can physical activity interventions for adults with type 2 diabetes be translated into practice settings? A systematic review using the RE-AIM framework. *Translational Behavioral Medicine* 2014;4(1):60-78.
44. Morrato EH, Hill JO, Wyatt HR, et al. Physical activity in U.S. adults with diabetes and at risk for developing diabetes, 2003. *Diabetes care* 2007;30(2):203-9. doi: 10.2337/dc06-1128 [published Online First: 2007/01/30]
45. Al-Nozha MM, Al-Hazzaa HM, Arafah MR, et al. Prevalence of physical activity and inactivity among Saudis aged 30-70 years. A population-based cross-sectional study. *Saudi medical journal* 2007;28(4):559-68. [published Online First: 2007/04/26]
46. Sibai AM, Costanian C, Tohme R, et al. Physical activity in adults with and without diabetes: from the 'high-risk' approach to the 'population-based' approach of prevention. *BMC Public Health* 2013;13:1002-02. doi: 10.1186/1471-2458-13-1002
47. Alghafri TS, Alharthi SM, Al-Farsi YM, et al. Study protocol for "MOVEdiabetes": a trial to promote physical activity for adults with type 2 diabetes in primary health care in Oman. *BMC Public Health* 2017;17(1):28. doi: 10.1186/s12889-016-3990-0 [published Online First: 2017/01/07]
48. Thomas N, Alder E, Leese GP. Barriers to physical activity in patients with diabetes. *Postgraduate Medical Journal* 2004;80(943):287-91.
49. Boudreau F, Godin G. Understanding physical activity intentions among French Canadians with type 2 diabetes: an extension of Ajzen's theory of planned behaviour. *The International Journal of Behavioral Nutrition and Physical Activity* 2009;6:35-35. doi: 10.1186/1479-5868-6-35



- 1 271 50. Plow MA, Allen SM, Resnik L. Correlates of Physical Activity Among Low-Income Older  
 2 272 Adults. *Journal of Applied Gerontology* 2011;30(5):629-42. doi:  
 3 273 doi:10.1177/0733464810375685
- 4 274 51. Trost SG, Owen N, Bauman AE, et al. Correlates of adults' participation in physical activity:  
 5 275 review and update. *Medicine And Science In Sports And Exercise* 2002;34(12):1996-  
 6 276 2001.
- 7 277 52. van Stralen MM, De Vries H, Mudde AN, et al. Determinants of initiation and maintenance  
 8 278 of physical activity among older adults: a literature review. *Health Psychology Review*  
 9 279 2009;3(2):147-207. doi: 10.1080/17437190903229462
- 10 280 53. Kirk A, MacMillan F, Webster N. Application of the Transtheoretical model to physical  
 11 281 activity in older adults with Type 2 diabetes and/or cardiovascular disease. *Psychology*  
 12 282 *of Sport and Exercise* 2010;11(4):320-24. doi:  
 13 283 <http://dx.doi.org/10.1016/j.psychsport.2010.03.001>
- 14 284 54. GCC statistical center. GCC-statistics 2010 [Available from: [https://gccstat.org/en/terms-of-](https://gccstat.org/en/terms-of-use13/10/2016)  
 15 285 [use13/10/2016](https://gccstat.org/en/terms-of-use13/10/2016).]
- 16 286 55. Bird EL, Baker G, Mutrie N, et al. Behavior change techniques used to promote walking and  
 17 287 cycling: a systematic review. *Health Psychol* 2013;32(8):829-38. doi:  
 18 288 10.1037/a0032078 [published Online First: 2013/03/13]
- 19 289 56. Donnelly TT, Al Suwaidi J, Al Enazi NR, et al. Qatari women living with cardiovascular  
 20 290 diseases-challenges and opportunities to engage in healthy lifestyles. *Health Care For*  
 21 291 *Women International* 2012;33(12):1114-34. doi: 10.1080/07399332.2012.712172
- 22 292 57. Bastiaens H, Sunaert P, Wens J, et al. Supporting diabetes self-management in primary  
 23 293 care: pilot-study of a group-based programme focusing on diet and exercise. *Primary*  
 24 294 *Care Diabetes* 2009;3(2):103-09. doi: 10.1016/j.pcd.2009.02.001
- 25 295 58. Matthews L. The feasibility, effectiveness and implementation of a physical activity  
 26 296 consultation service for adults within routine diabetes care. [Implementation of  
 27 297 physical activity services for the management of adults with Type 2 Diabetes].  
 28 298 University of Strathclyde School of Psychological Sciences and Health, 2013.
- 29 299 59. Barrera M, Strycker LA, Mackinnon DP, et al. Social-ecological resources as mediators of  
 30 300 two-year diet and physical activity outcomes in type 2 diabetes patients. *Health*  
 31 301 *Psychology: Official Journal Of The Division Of Health Psychology, American*  
 32 302 *Psychological Association* 2008;27(2 Suppl):S118-S25. doi: 10.1037/0278-  
 33 303 6133.27.2(Suppl.).S118
- 34 304 60. Alberti KGMM, Zimmet PZ. Definition, diagnosis and classification of diabetes mellitus and  
 35 305 its complications. Part 1: diagnosis and classification of diabetes mellitus. Provisional  
 36 306 report of a WHO Consultation. *Diabet Med* 1998;15(7):539-53. doi:  
 37 307 10.1002/(SICI)1096-9136(199807)15:7<539::AID-DIA668>3.0.CO;2-S
- 38 308 61. Borschmann K, Moore K, Russell M, et al. Overcoming barriers to physical activity among  
 39 309 culturally and linguistically diverse older adults: a randomised controlled trial.  
 40 310 *Australasian Journal On Ageing* 2010;29(2):77-80. doi: 10.1111/j.1741-  
 41 311 6612.2009.00390.x
- 42 312 62. Donahue KE, Mielenz TJ, Sloane PD, et al. Identifying supports and barriers to physical  
 43 313 activity in patients at risk for diabetes. *Preventing chronic disease* 2006;3(4):A119-A19.

314

50  
51  
52  
53 315 **Figure 1: Box and Whisker plots for the reported barrier sum scores of 0-9 (high**  
 54  
55 316 **scores defined as  $\geq 5$ )**

56  
57  
58 317 **Figure 2: Percentage of reported high barrier scores ( $\geq 5$ )**



Figure 1: Box and Whisker plots for the reported barrier sum scores of 0-9 (high scores defined as  $\geq 5$ )

132x106mm (300 x 300 DPI)

For peer review only

1  
2  
3  
4  
5  
6  
7  
8  
9  
10  
11  
12  
13  
14  
15  
16  
17  
18  
19  
20  
21  
22  
23  
24  
25  
26  
27  
28  
29  
30  
31  
32  
33  
34  
35  
36  
37  
38  
39  
40  
41  
42  
43  
44  
45  
46  
47  
48  
49  
50  
51  
52  
53  
54  
55  
56  
57  
58  
59  
60

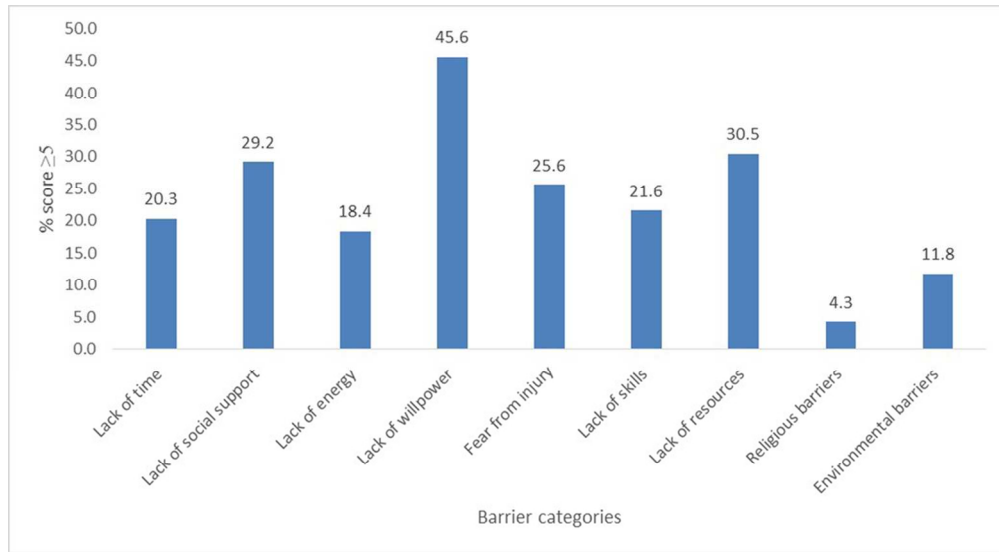

Figure 2: Percentage of reported high barrier scores ( $\geq 5$ )

96x53mm (300 x 300 DPI)

review only

| من فضلك أجب عن الأسئلة التالية |        |             |            |                                                                                                          |
|--------------------------------|--------|-------------|------------|----------------------------------------------------------------------------------------------------------|
| ٠                              | ١      | ٢           | ٣          |                                                                                                          |
| لا                             | نادراً | نعم أحياناً | نعم غالباً |                                                                                                          |
| أبداً                          |        |             |            |                                                                                                          |
|                                |        |             |            | ١ يومي مشغول جداً لذلك لا أستطيع أن أجعل لي وقت خاص بالتمارين ضمن جدولتي اليومي                          |
|                                |        |             |            | ٢ لا أحد من أفراد عائلتي أو أصدقائي يفضلون ممارسة الرياضة لذلك فأني لا أجد فرصة لممارستها                |
|                                |        |             |            | ٣ أكون متعب جداً بعد العمل فلا أستطيع ممارسة الرياضة                                                     |
|                                |        |             |            | ٤ كنت أفكر في زيادة التمارين الرياضية لكن لا يبدو أنني أستطيع البدء بذلك                                 |
|                                |        |             |            | ٥ أنني كبير في السن لذا فممارسة الرياضة تشكل خطراً على                                                   |
|                                |        |             |            | ٦ لا أمارس الرياضة كثيراً وذلك لأنني لم أتعلم مهارات إي نوع من أنواع الرياضة                             |
|                                |        |             |            | ٧ المسابح، المسارات، الدراجات ..... الخ غير متوفرة للاستخدام بالنسبة لي                                  |
|                                |        |             |            | ٨ ممارسة الرياضة تأخذ الكثير من وقت التزامات أخرى مثل وقت العمل والأسرة                                  |
|                                |        |             |            | ٩ أشعر بالخجل من منظري وأنا أمارس الرياضة مع الآخرين                                                     |
|                                |        |             |            | ١٠ أنا لا أحصل على القدر المكافئ من النوم فلا أستطيع الاستيقاظ مبكراً أو البقاء في الليل لممارسة الرياضة |
|                                |        |             |            | ١١ من الأسهل علي إيجاد عذر لعدم ممارسه الرياضه من الخروج لعمل شئ آخر                                     |
|                                |        |             |            | ١٢ أنا أعرف أناس كثيرين أدوا أنفسهم من كثرة ممارسة الرياضة                                               |
|                                |        |             |            | ١٣ أنا أرى أنه لا يمكن تعلم أي رياضه جديدة في مثل سني                                                    |
|                                |        |             |            | ١٤ أن ممارسة الرياضة أمر مكلف جداً فيجب على شراء أدوات رياضيه أو أخذ دروس رياضيه                         |
|                                |        |             |            | ١٥ وقت فراغي أثناء اليوم ضيق جداً لا يكفي لأداء التمارين الرياضية                                        |
|                                |        |             |            | ١٦ نشاطاتي الاجتماعية المعتادة مع العائلة والأصدقاء لا تتضمن أي نشاط رياضي                               |
|                                |        |             |            | ١٧ أنا متعبة جداً خلال أيام الأسبوع واحتاج أيام العطلة للراحة وليس للرياضة                               |
|                                |        |             |            | ١٨ أريد ان أمارس المزيد ولكن يبدو أنني لا أستطيع أن استمر على شئ معين                                    |
|                                |        |             |            | ١٩ أخاف ان أؤذي نفسي او أصاب بأزمه قلبيه                                                                 |
|                                |        |             |            | ٢٠ ليس لدي القدرة الكافية لتحويل ممارسة الرياضة لمتعه                                                    |
|                                |        |             |            | ٢١ لو كانت هناك أجهزه رياضية وغرف للاستحمام في موقع العمل لكان من الأرجح ان أقوم بالتمارين الرياضية      |
|                                |        |             |            | ٢٢ معتقداتي الدينيه لا تسمح لي بممارسه النشاط البدني                                                     |
|                                |        |             |            | ٢٣ الطقس (الحراو البرد الشديدين) لا يسمح لي بممارسه النشاط البدني                                        |
|                                |        |             |            | ٢٤ الملابس الرياضيه غير لا تتناسب مع مجتمعا                                                              |
|                                |        |             |            | ٢٥ النشاط البدني في الصيف غير مناسب لي                                                                   |
|                                |        |             |            | ٢٦ أخلاقيات الدينيه لا تسمح لي بممارسه النشاط البدني                                                     |
|                                |        |             |            | ٢٧ البيئه المحيطه لا يسمح لي بممارسه النشاط البدني                                                       |

| How likely are you to say?                                                                                            | Very likely<br>3 | Somewhat likely<br>2 | Somewhat unlikely<br>1 | Very unlikely<br>0 |
|-----------------------------------------------------------------------------------------------------------------------|------------------|----------------------|------------------------|--------------------|
| 1. My day is so busy now, I just don't think I can make the time to include physical activity in my regular schedule. |                  |                      |                        |                    |
| 2. None of my family members or friends like to do anything active, so I don't have a chance to exercise.             |                  |                      |                        |                    |
| 3. I'm just too tired after work to get any exercise.                                                                 |                  |                      |                        |                    |
| 4. I've been thinking about getting more exercise, but I just can't seem to get started                               |                  |                      |                        |                    |
| 5. I'm getting older so exercise can be risky.                                                                        |                  |                      |                        |                    |
| 6. I don't get enough exercise because I have never learned the skills for any sport.                                 |                  |                      |                        |                    |
| 7. I don't have access to jogging trails, swimming pools, bike paths, etc.                                            |                  |                      |                        |                    |
| 8. Physical activity takes too much time away from other commitments—time, work, family, etc.                         |                  |                      |                        |                    |
| 9. I'm embarrassed about how I will look when I exercise with others.                                                 |                  |                      |                        |                    |
| 10. I don't get enough sleep as it is. I just couldn't get up early or stay up late to get some exercise.             |                  |                      |                        |                    |
| 11. It's easier for me to find excuses not to exercise than to go out to do something.                                |                  |                      |                        |                    |
| 12. I know of too many people who have hurt themselves by overdoing it with exercise.                                 |                  |                      |                        |                    |
| 13. I really can't see me learning a new sport at my age.                                                             |                  |                      |                        |                    |
| 14. It's just too expensive. You have to take a class or join a club or buy the right equipment.                      |                  |                      |                        |                    |
| 15. My free times during the day are too short to include exercise.                                                   |                  |                      |                        |                    |
| 16. My usual social activities with family or friends do not include physical activity                                |                  |                      |                        |                    |
| 17. I'm too tired during the week and I need the weekend to catch up on my rest.                                      |                  |                      |                        |                    |
| 18. I want to get more exercise, but I just can't seem to make myself stick to anything.                              |                  |                      |                        |                    |
| 19. I'm afraid I might injure myself or have a heart attack.                                                          |                  |                      |                        |                    |
| 20. I'm not good enough at any physical activity to make it fun.                                                      |                  |                      |                        |                    |
| 21. If we had exercise facilities and showers at work, then I would be more likely to exercise.                       |                  |                      |                        |                    |
| 22. my religious believes are not supportive for PA                                                                   |                  |                      |                        |                    |
| 23. extreme hot weather is an obstacle                                                                                |                  |                      |                        |                    |
| 24. sports cloths are not culturally appropriate                                                                      |                  |                      |                        |                    |
| 25. PA in the summer times is not convenient to me                                                                    |                  |                      |                        |                    |
| 26. My religious thoughts are against performing PA                                                                   |                  |                      |                        |                    |
| 27. the environment around be is not supportive for PA                                                                |                  |                      |                        |                    |

## Factor analysis and reliability test results

Initially, the factorability of the 27 items/questions was examined. The Kaiser-Meyer-Olkin (KMO) measure of sampling adequacy was 0.711, above the commonly recommended value of 0.600. Bartlett's test of sphericity (test of at least one significant correlation between 2 of the items studied) was also significant ( $\chi^2(351) = 2600.175, p < .05$ ).<sup>1</sup> The communalities (proportion of item's variance explained by the extracted factors) were all above 0.300, further confirming that each item shared some common variance with other items. Given these overall indicators, factor analysis was regarded to be suitable with all the 27 items/questions.

PCA for 9 components solution namely lack of willpower/time/energy and skills, fear of injury, lack of time/ lack of energy, environmental barriers, religious barriers, lack of willpower, lack of skills/ social support and lack of resources, explained 13.1%, 11.4%, and 9.2%, 9.0%, 7.2%, 5.1%, 4.3%, 3.8% and 3.6% of the variance respectively.

None of the 27 items were eliminated because they all met a minimum criteria of having a primary factor loading (how much a factor explains a variable) of 0.4 or above. Solutions for the nine components were examined using Oblimin rotation of the factor loading matrix. The factor loading matrix for this final solution is presented in Table 1. All factor loadings were in the same direction of the barrier categories used in the current study where a set of three items instructed a barrier category mainly component 2, 4, 5, 6, and 9 representing fear from injury, environmental barriers, religious barriers, lack of willpower, and lack of resources respectively. However, cross contributions were evident in four out of the nine extracted components namely component 1 (lack of willpower, time, energy and skills), component 3 (lack of time and energy), component 7 (lack of social support and skills), and component 8 (lack of social support and energy). Component correlation matrix, presented in table 2, shows weak correlations between the extracted nine components  $<0.200$  except for the correlations of

0.201 and -0.204 between component 6 (lack of willpower) with 7 (combination of lack of skills and social support) and 2 (fear of injury) with 9 (lack of resources) respectively.

McDonald's coefficient Omega was equal to 0.750 indicating moderate reliability of the 27 items/questions scale.<sup>2</sup>

**Table 1: The extracted components and factor loadings based on a principal components analysis with Oblimin rotation for the 27 items/questions used in the current study (N = 305)**

| Items/<br>questions | Extracted components (1-9)* |      |      |      |      |       |       |   |   |
|---------------------|-----------------------------|------|------|------|------|-------|-------|---|---|
|                     | 1                           | 2    | 3    | 4    | 5    | 6     | 7     | 8 | 9 |
| Q4                  | .503                        |      |      |      |      | -.502 |       |   |   |
| Q19                 |                             | .879 |      |      |      |       |       |   |   |
| Q12                 |                             | .801 |      |      |      |       |       |   |   |
| Q5                  |                             | .791 |      |      |      |       |       |   |   |
| Q1                  |                             |      | .745 |      |      |       |       |   |   |
| Q15                 |                             |      | .743 |      |      |       |       |   |   |
| Q17                 |                             |      | .721 |      |      |       |       |   |   |
| Q3                  | .351                        |      | .604 |      |      |       |       |   |   |
| Q8                  | -.423                       |      | .468 |      |      |       |       |   |   |
| Q24                 |                             |      |      | .922 |      |       |       |   |   |
| Q26                 |                             |      |      | .909 |      |       |       |   |   |
| Q22                 |                             |      |      | .839 |      |       |       |   |   |
| Q25                 |                             |      |      |      | .899 |       |       |   |   |
| Q23                 |                             |      |      |      | .871 |       |       |   |   |
| Q27                 |                             |      |      |      | .777 |       |       |   |   |
| Q20                 |                             |      |      |      |      | -.788 |       |   |   |
| Q11                 |                             |      |      |      |      |       |       |   |   |
| Q18                 |                             |      |      |      |      | -.748 |       |   |   |
| Q16                 |                             |      |      |      |      |       | -.789 |   |   |
| Q13                 |                             |      |      |      |      |       | -.712 |   |   |
| Q6                  | .470                        |      |      |      |      |       | -.538 |   |   |
| Q2                  |                             |      |      |      |      |       | -.390 |   |   |

|     |      |  |  |  |  |  |  |      |      |
|-----|------|--|--|--|--|--|--|------|------|
| Q9  |      |  |  |  |  |  |  | .819 |      |
| Q10 | .383 |  |  |  |  |  |  | .622 |      |
| Q14 |      |  |  |  |  |  |  |      | .802 |
| Q7  |      |  |  |  |  |  |  |      | .765 |
| Q21 |      |  |  |  |  |  |  |      | .761 |

\*1=lack of willpower/energy/time/skills, 2=fear of injury, 3=lack of time/ lack of energy, 4=environmental barriers, 5=religious barriers, 6=lack of willpower, 7=lack of skills/ social support, 8=lack of energy/social support and 9=lack of resources.

**Table 2: Component correlation matrix**

| Extracted components* | 1     | 2     | 3     | 4     | 5     | 6     | 7     | 8     | 9     |
|-----------------------|-------|-------|-------|-------|-------|-------|-------|-------|-------|
| 1                     | 1.000 | -.008 | .017  | .028  | -.046 | -.151 | -.049 | .020  | .149  |
| 2                     | -.008 | 1.000 | -.099 | -.023 | .025  | -.028 | -.199 | .000  | -.204 |
| 3                     | .017  | -.099 | 1.000 | .063  | -.117 | -.127 | -.043 | .145  | .009  |
| 4                     | .028  | -.023 | .063  | 1.000 | .014  | .004  | -.016 | .051  | .019  |
| 5                     | -.046 | .025  | -.117 | .014  | 1.000 | .062  | -.014 | -.034 | -.021 |
| 6                     | -.151 | -.028 | -.127 | .004  | .062  | 1.000 | .207  | -.153 | -.125 |
| 7                     | -.049 | -.199 | -.043 | -.016 | -.014 | .207  | 1.000 | -.134 | -.009 |
| 8                     | .020  | .000  | .145  | .051  | -.034 | -.153 | -.134 | 1.000 | .014  |
| 9                     | .149  | -.204 | .009  | .019  | -.021 | -.125 | -.009 | .014  | 1.000 |

\*1=lack of willpower/energy/time/skills, 2=fear of injury, 3=lack of time/ lack of energy, 4=environmental barriers, 5=religious barriers, 6=lack of willpower, 7=lack of skills/ social support, 8=lack of energy/social support and 9=lack of resources.

Further Factor analysis and reliability tests were conducted on the studied barrier subscales (3 questions per barrier). Table 3 provide factor loadings and McDonald’s coefficient Omega for all the nine subscales used in the current study indicating excellent sub-scale quality.

**Table 3: Factor loadings and McDonald’s coefficient Omega for the study subscales**

| Barrier categories     | Items/questions | factor loadings | Omega |
|------------------------|-----------------|-----------------|-------|
| Lack of time           | Q15             | 0.826           | 0.900 |
|                        | Q1              | 0.798           |       |
|                        | Q8              | 0.618           |       |
| Lack of social support | Q16             | 0.734           | 0.900 |
|                        | Q2              | 0.680           |       |
|                        | Q9              | 0.534           |       |
| Lack of energy         | Q3              | 0.755           | 0.900 |
|                        | Q17             | 0.720           |       |
|                        | Q10             | 0.581           |       |
| Lack of willpower      | Q18             | 0.837           | 0.900 |
|                        | Q4              | 0.746           |       |
|                        | Q11             | 0.691           |       |



|                        |     |       |       |
|------------------------|-----|-------|-------|
| Fear of injury         | Q19 | 0.904 | 0.900 |
|                        | Q12 | 0.823 |       |
|                        | Q5  | 0.803 |       |
| Lack of skills         | Q6  | 0.840 | 0.900 |
|                        | Q13 | 0.646 |       |
|                        | Q20 | 0.560 |       |
| Lack of resources      | Q7  | 0.837 | 0.900 |
|                        | Q21 | 0.831 |       |
|                        | Q14 | 0.754 |       |
| Religious barriers     | Q25 | 0.905 | 0.900 |
|                        | Q23 | 0.872 |       |
|                        | Q27 | 0.786 |       |
| Environmental barriers | Q24 | 0.924 | 0.900 |
|                        | Q26 | 0.913 |       |
|                        | Q22 | 0.847 |       |

1. Tobias S, Carlson JE. BRIEF REPORT: BARTLETT'S TEST OF SPHERICITY AND CHANCE FINDINGS IN FACTOR ANALYSIS. *Multivariate Behavioral Research* 1969;4(3):375-77. doi: 10.1207/s15327906mbr0403\_8
2. Dunn TJ, Baguley T, Brunnsden V. From alpha to omega: a practical solution to the pervasive problem of internal consistency estimation. *British journal of psychology (London, England : 1953)* 2014;105(3):399-412. doi: 10.1111/bjop.12046 [published Online First: 2014/05/23]

STROBE Statement—checklist of items that should be included in reports of observational studies

|                           | Item No | Page number (where information can be found in the manuscript) |
|---------------------------|---------|----------------------------------------------------------------|
| Title and abstract        | 1       | 1 & 2-3                                                        |
| <b>Introduction</b>       |         |                                                                |
| Background/rationale      | 2       | 4                                                              |
| Objectives                | 3       | 5                                                              |
| <b>Methods</b>            |         |                                                                |
| Study design              | 4       | 5                                                              |
| Setting                   | 5       | 6                                                              |
| Participants              | 6       | 6                                                              |
|                           |         |                                                                |
| Variables                 | 7       | 6                                                              |
| Data sources/ measurement | 8       | 6                                                              |
| Bias                      | 9       | 7                                                              |
| Study size                | 10      | 8                                                              |
| Quantitative variables    | 11      | 8                                                              |
| Participants              | 13      | 8                                                              |
| <b>Results</b>            |         |                                                                |
| Descriptive data          | 14      | 8-9                                                            |
| Outcome data              | 15      | 10-14                                                          |
| Main results              | 16      | 14-15                                                          |
| Other analyses            | 17      | 15                                                             |
| <b>Discussion</b>         |         |                                                                |
| Key results               | 18      | 16-18                                                          |
| Limitations               | 19      | 19                                                             |
| Interpretation            | 20      | 19                                                             |
| Generalisability          | 21      | 19                                                             |
| <b>Other information</b>  |         |                                                                |
| Funding                   | 22      | 20                                                             |

# BMJ Open

## Perceived barriers to leisure time physical activity in adults with type 2 diabetes attending primary health care in Oman: a cross-sectional survey

|                                 |                                                                                                                                                                                                                                                                                                                                                                                                                                                                                                                                                                                       |
|---------------------------------|---------------------------------------------------------------------------------------------------------------------------------------------------------------------------------------------------------------------------------------------------------------------------------------------------------------------------------------------------------------------------------------------------------------------------------------------------------------------------------------------------------------------------------------------------------------------------------------|
| Journal:                        | <i>BMJ Open</i>                                                                                                                                                                                                                                                                                                                                                                                                                                                                                                                                                                       |
| Manuscript ID                   | bmjopen-2017-016946.R4                                                                                                                                                                                                                                                                                                                                                                                                                                                                                                                                                                |
| Article Type:                   | Research                                                                                                                                                                                                                                                                                                                                                                                                                                                                                                                                                                              |
| Date Submitted by the Author:   | 18-Oct-2017                                                                                                                                                                                                                                                                                                                                                                                                                                                                                                                                                                           |
| Complete List of Authors:       | Alghafri, Thamra; Ministry of Health, Planning<br>Alharthi, Saud; Ministry of Health, Medicine<br>Al-Farsi, Yahya; Sultan Qaboos University College of Medicine and Health Science, FAMCO<br>Bannerman, Elaine; Ninewells Hospital and Medical School., Centre for Public Health Nutrition Research, University of Dundee<br>Craigie, Angela; Centre for Research into Cancer Prevention and Screening, Medical Research Institute, University of Dundee<br>Anderson, Annie; Ninewells Hospital and Medical School, Centre for Public Health Nutrition Research, University of Dundee |
| <b>Primary Subject Heading</b>: | Diabetes and endocrinology                                                                                                                                                                                                                                                                                                                                                                                                                                                                                                                                                            |
| Secondary Subject Heading:      | Sports and exercise medicine                                                                                                                                                                                                                                                                                                                                                                                                                                                                                                                                                          |
| Keywords:                       | Physical Activity, Type 2 diabetes, Primary health care, Barriers, Oman, General diabetes < DIABETES & ENDOCRINOLOGY, PUBLIC HEALTH, SPORTS MEDICINE                                                                                                                                                                                                                                                                                                                                                                                                                                  |
|                                 |                                                                                                                                                                                                                                                                                                                                                                                                                                                                                                                                                                                       |

SCHOLARONE™  
Manuscripts

1  
2  
3  
4  
5  
6  
7  
8  
9  
10  
11  
12  
13  
14  
15  
16  
17  
18  
19  
20  
21  
22  
23  
24  
25  
26  
27  
28  
29  
30  
31  
32  
33  
34  
35  
36  
37  
38  
39  
40  
41  
42  
43  
44  
45  
46  
47  
48  
49  
50  
51  
52  
53  
54  
55  
56  
57  
58  
59  
60

1 **Perceived barriers to leisure time physical activity in adults with type 2 diabetes**  
2 **attending primary health care in Oman: a cross-sectional survey**

3 **Thamra S Alghafri<sup>1\*</sup>, Saud M Alharthi<sup>1</sup>, Yahya Al-farsi<sup>2</sup>, Elaine Bannerman<sup>3</sup>, Angela M**  
4 **Craigie<sup>3</sup>, Annie S Anderson<sup>3</sup>**

5 <sup>1</sup>Directorate General of Health Services, Ministry of Health, Muscat, Oman.

6 <sup>2</sup>Department of Family Medicine and Public Health, College of Medicine and Health  
7 Sciences, Sultan Qaboos University, Oman.

8 <sup>3</sup>Centre for Public Health Nutrition Research, University of Dundee, Ninewells Hospital  
9 and Medical School.

10 \*Corresponding author: Thamra S Alghafri (TSA) PO Box 2723, Postal Code 112,  
11 Oman, email: [tsalghafri@dundee.ac.uk](mailto:tsalghafri@dundee.ac.uk), Telephone number 0096899376455

12 Email addresses:

13 Saud M Alharthi (SMA): [smsbar07@gmail.com](mailto:smsbar07@gmail.com)

14 Yahya Al-farsi (YMF): [ymfarsi@gmail.com](mailto:ymfarsi@gmail.com)

15 Elaine Bannerman (EB): [e.bannerman@dundee.ac.uk](mailto:e.bannerman@dundee.ac.uk)

16 Angela M. Craigie (AMC): [a.craigie@dundee.ac.uk](mailto:a.craigie@dundee.ac.uk)

17 Annie S Anderson (ASA): [a.s.anderson@dundee.ac.uk](mailto:a.s.anderson@dundee.ac.uk)

18 **WORD COUNT:** 4256

19 **COPYRIGHT:** The Corresponding Author has the right to grant on behalf of all  
20 authors and does grant on behalf of all authors, an exclusive licence on a worldwide  
21 basis to the BMJ Publishing Group Ltd to permit this article (if accepted) to be  
22 published in BMJ editions and any other BMJ PGL products and sublicences such use  
23 and exploit all subsidiary rights, as set out in our licence.

1  
2  
3  
4  
5  
6  
7  
8  
9  
10  
11  
12  
13  
14  
15  
16  
17  
18  
19  
20  
21  
22  
23  
24  
25  
26  
27  
28  
29  
30  
31  
32

**TRANSPARENCY DECLARATION:** This manuscript is an honest, accurate, and transparent account of the study being reported. There are no important aspects of the study that are omitted; and any possible discrepancies from the study are explained.

**TECHNICAL APPENDIX:** Data generated from this study is not available for public use. However it is available from the corresponding author on reasonable request and approvals from Oman Ministry of Health.

**FUNDING:** The Oman Ministry of Health funded this project.

**CONFLICTS OF INTEREST:** No competing interests.

33 **ABSTRACT**

34 **Objectives:** Physical activity is fundamental in diabetes management for good  
35 metabolic control. This study aimed to identify barriers to performing leisure time  
36 physical activity and explore differences based on gender, age, marital status,  
37 employment, education, income and perceived stages of change in physical activity in  
38 adults with type 2 diabetes in Oman.

39 **Design:** Cross-sectional study using an Arabic version of the “Barriers to Being Active”  
40 27 item questionnaire.

41 **Setting:** Seventeen primary health centres randomly selected in Muscat.

42 **Participants:** Individuals >18 years with type 2 diabetes, attending diabetes clinic for >  
43 2 years and with no contraindications to performing physical activity.

44 **Primary and secondary outcome measures:**

45 Participants were asked to rate how far different factors influenced their physical  
46 activity, under the following categories: fear of injury, lack of time, social support,  
47 energy, willpower, skills, resources, religion and environment. On a scale of 0-9,  
48 barriers were considered important if scored  $\geq 5$ .

49 **Results:** A total of 305 questionnaires were collected. Most (96%) reported at least one  
50 barrier to performing leisure time physical activity. Lack of willpower (44.4%), lack of  
51 resources (30.5%) and lack of social support (29.2%) were the most frequently reported  
52 barriers. Using chi-square test, lack of willpower was significantly different in  
53 individuals with low vs high income (54.2% vs 40%,  $P=0.002$ ) and in those reporting  
54 inactive vs active stages of change for physical activity (50.7% vs 34.7%,  $P=0.029$ ),  
55 lack of resources was significantly different in those with low vs high income (40% vs

1  
2  
3  
4  
5  
6  
7  
8  
9  
10  
11  
12  
13  
14  
15  
16  
17  
18  
19  
20  
21  
22  
23  
24  
25  
26  
27  
28  
29  
30  
31  
32  
33  
34  
35  
36  
37  
38  
39  
40  
41  
42  
43  
44  
45  
46  
47  
48  
49  
50  
51  
52  
53  
54  
55  
56  
57  
58  
59  
60

24.3%,  $P=0.004$ ) and married vs unmarried (33.8% vs 18.5%,  $P=0.018$ ). Lack of social support was significant in females vs males (35.4% vs 20.8%,  $P=0.005$ ).

**Conclusions:** The findings can inform the design on physical activity intervention studies by testing the impact of strategies which incorporate ways to address reported barriers including approaches that enhance self-efficacy and social support.

**Key words:** Physical Activity, Type 2 diabetes, Primary health care, Barriers, Oman

## ARTICLE SUMMARY

### Strengths and limitations of this study

- Barriers to performing leisure physical activity for adults with type 2 diabetes were investigated in Oman where prevalence of both diabetes and physical inactivity is high.
- Questions on possible barriers to performing physical activity linked to religion and environment were included.
- The tool used in this study was an English to Arabic language translated questionnaire that may have affected the validity of questions.

## INTRODUCTION

Oman is located in Southwest Asia on the Southeast coast of the Arabian Peninsula. Similar to its neighbouring countries (United Arab Emirates, Saudi Arabia, Qatar, Bahrain, and Kuwait), Oman has witnessed enormous economic advancement in recent decades, along with significant increases in non-communicable diseases including a rising prevalence of diabetes. Diabetes prevalence in Oman has increased from 8.3% in 1991 to 12.3% in 2008 and recent estimates are in the order of 14.8%, exceeding global rates.<sup>1,2</sup> The World Health Organization (WHO) has indicated that physical inactivity is one of the top ten leading global causes of mortality and disability worldwide, and the principal cause for approximately 27% of diabetes, and approximately 30% of ischemic

1  
2  
3  
4  
5  
6  
7  
8  
9  
10  
11  
12  
13  
14  
15  
16  
17  
18  
19  
20  
21  
22  
23  
24  
25  
26  
27  
28  
29  
30  
31  
32  
33  
34  
35  
36  
37  
38  
39  
40  
41  
42  
43  
44  
45  
46  
47  
48  
49  
50  
51  
52  
53  
54  
55  
56  
57  
58  
59  
60

81 heart disease.<sup>3</sup> In Oman, it has been reported that almost 70% of the population are  
82 physically inactive (daily activity of  $\leq 10$  minutes).<sup>4</sup> This raises concerns regarding the  
83 impact these high levels of physical inactivity may be having on lifestyle related chronic  
84 diseases including diabetes, on health care expenditures and overall population health.<sup>5</sup>

85 The protective effects of physical activity (PA) in the management of diabetes,  
86 specifically type 2 diabetes (T2D), have been widely reported.<sup>6 7</sup> WHO recommends at  
87 least 150 minutes of moderate to vigorous physical activity or 75 minutes of vigorous  
88 PA/week.<sup>8</sup> However, over 60% of patients with diabetes in western countries do not  
89 meet the recommended levels of PA.<sup>9 10</sup> The Oman World Health Survey (OWHS)  
90 2008, reported that in Oman, only 15% of patients with diabetes (98% of them with type  
91 2 diabetes) met PA recommendations using the Global Physical Activity Questionnaire  
92 (GPAQ).<sup>2</sup>

93 The importance of leisure time PA in meeting PA recommendations is consistently<sup>11</sup>  
94 associated with reduced mortality risks (20% to >37% risk reduction) and favourable  
95 cardiovascular outcomes.<sup>12</sup> This relationship appears to have a dose-response effect  
96 where the upper threshold for mortality benefit occurs at 3 to 5 times the leisure PA  
97 recommendations of 7.5-<15 MET h/wk.<sup>12</sup> No clear association is observed for  
98 occupational or travel physical activity.<sup>13</sup>

99 Theoretical models underpinning effective interventions to promote personalized PA  
100 (contents, methods and approaches) should focus on benefits and ways to overcome  
101 barriers to PA.<sup>14</sup> Literature to date mainly from western countries has reported a number  
102 of potential barriers to performing PA in adults with diabetes. These include lack of  
103 time,<sup>15-18</sup> physical constraints including pain,<sup>19</sup> lack of knowledge and limited facilities.<sup>20</sup>  
104 Differences in reporting barriers to PA have been noted across genders, age groups,  
105 environments, cultures and disease status. Female gender, increasing age, unsafe  
106 neighbourhoods, being overweight and being a smoker increased the odds of reporting



1  
2  
3  
4  
5  
6  
7  
8  
9  
10  
11  
12  
13  
14  
15  
16  
17  
18  
19  
20  
21  
22  
23  
24  
25  
26  
27  
28  
29  
30  
31  
32  
33  
34  
35  
36  
37  
38  
39  
40  
41  
42  
43  
44  
45  
46  
47  
48  
49  
50  
51  
52  
53  
54  
55  
56  
57  
58  
59  
60

107 barriers to PA among migrant populations like African Americans, South Asian British  
108 and Mexican Americans.<sup>21-23</sup> In the Arab countries, modest evidence on barriers to PA  
109 in both the general population and in adults with T2D suggests that lack of time, co-  
110 existing diseases and adverse weather conditions<sup>14 24-29</sup> are the main factors. Moreover,  
111 the climate in this region may be a drawback to meeting recommended levels of PA due  
112 to high temperatures during the day, particularly in the sandy/desert areas. During the  
113 summer months, these countries including Oman experience major heat waves (>40  
114 degrees celsius) and humidity levels that could reach 90%.

115 The current study aimed to identify barriers to performing leisure-time PA in adults  
116 with T2D in Oman, and the distribution of barrier scores across different socio-  
117 demographic characteristics and perceived stages of change in PA.

## 118 **METHODS**

### 119 **Study design, setting and participants**

120 This cross-sectional interview based study was part of a larger study that examined  
121 correlates of physical activity and sitting time in adults with type 2 diabetes, and  
122 barriers to leisure physical activity in the same population. Results regarding the PA  
123 patterns of the population using the Global Physical Activity Questionnaire are  
124 reported elsewhere.<sup>30</sup> This current paper identified barriers to performing leisure  
125 physical activity expressed by Omani adults with T2D using adapted questions from the  
126 Centers for Disease Control and Prevention (CDC) questionnaire<sup>31</sup> conducted in April/  
127 May 2015 in Muscat (Urban communities). Reporting of this study follows the  
128 guidelines for strengthening the reporting of observational studies in epidemiology  
129 (STROBE).<sup>32</sup>

1  
2  
3  
4  
5  
6  
7  
8  
9  
10  
11  
12  
13  
14  
15  
16  
17  
18  
19  
20  
21  
22  
23  
24  
25  
26  
27  
28  
29  
30  
31  
32  
33  
34  
35  
36  
37  
38  
39  
40  
41  
42  
43  
44  
45  
46  
47  
48  
49  
50  
51  
52  
53  
54  
55  
56  
57  
58  
59  
60

130 All patients with T2D attending their routine diabetes clinics in 17 randomly selected  
131 primary health care centres in Muscat were approached to take part in the study.  
132 Inclusion criteria were age >18 years and being followed up in a diabetes clinic for >2  
133 years and ability to provide informed consent. For illiterate participants, informed  
134 consents were taken from their spouse, son, daughter or other close family member.  
135 Participants with type 1 diabetes, newly diagnosed (<6 months) or who had difficulty in  
136 performing any physical activity, including history of myocardial infarction of <6  
137 months and multiple organ failure, were excluded.

### 138 **Data sources/ measurement**

139 In addition to recording physiological data [Body Mass Index (BMI), medication,  
140 duration of diabetes, blood pressure (BP), lipid profile, and comorbidities coinciding  
141 with diabetes] from the electronic health system, a multi-section questionnaire with a  
142 range of answers in closed format was administered by a trained interviewer. The  
143 following information was collected:

144 *Socio-demographic data:* included gender, age, marital status, education, household  
145 income, and employment.

146 *Perceptions on stage of change in physical activity:* Based on the trans-theoretical  
147 theory of behaviour change,<sup>33</sup> subjects were asked to identify their perceived stage of  
148 change in physical activity. Participants were to select “Maintenance stage” if they were  
149 participating in moderate physical activity five or more times per week or in vigorous  
150 activity three to five times per week longer than six consecutive months or select  
151 “Action stage” if less than six months. “Preparation stage” was selected by subjects who  
152 were thinking about starting exercise such as walking in the near future, or doing  
153 vigorous activity less than three times per week, or moderate activity less than five  
154 times per week. Contemplation stage “getting ready” was selected by subjects who were

1  
2  
3  
4  
5  
6  
7  
8  
9  
10  
11  
12  
13  
14  
15  
16  
17  
18  
19  
20  
21  
22  
23  
24  
25  
26  
27  
28  
29  
30  
31  
32  
33  
34  
35  
36  
37  
38  
39  
40  
41  
42  
43  
44  
45  
46  
47  
48  
49  
50  
51  
52  
53  
54  
55  
56  
57  
58  
59  
60

155 thinking about starting exercise or walk in the next six months. Subjects who were not  
156 thinking about starting any PA in the near future selected pre-contemplation stage “not  
157 ready”.

158 *CDC questionnaire on barriers to leisure PA:*

159 An English to Arabic translated CDC questionnaire “Barriers to Being Active” was  
160 used in a study in Saudi Arabia<sup>14</sup> with 21 questions on seven barriers (lack of time, lack  
161 of social support, lack of energy, lack of willpower, fear of injury, lack of skill and lack  
162 of resources). Permission to use the questionnaire was obtained from the lead author on  
163 November 24, 2014  
164 (<https://www.ncbi.nlm.nih.gov/pmc/articles/PMC2813614/figure/F0001/>). However, in  
165 that tool no statements on religion or environment as possible barriers to PA were  
166 included. To address this gap and to formulate robust items on these topics we  
167 undertook several procedures. Literature search was conducted to identify possible  
168 content for the new items from similar studies in neighbour countries with similar socio-  
169 economical characteristics.<sup>28 29</sup> Potential religious barriers considered questions on  
170 religious beliefs restricting PA, accepted clothing for PA and religious perceptions on  
171 PA.<sup>14 25 26</sup> Potential environmental barriers included questions on extreme weather  
172 conditions, physical activity in summer time and availability of appropriate environment  
173 for PA.<sup>16 25</sup> Content and face validity of the questionnaire were assessed by our  
174 investigatory team and draft questions were then discussed with a sample of patients  
175 prior to field testing and adjustments were made to ease comprehension and ensure  
176 translation to Arabic was appropriate.

177 A set of three related questions (total of 27 questions) presented in random order within  
178 the questionnaire represented one barrier category. A scoring system<sup>31</sup> was used to  
179 indicate how likely each statement/item was considered to be a barrier (very likely=3,  
180 somewhat likely=2, somewhat unlikely=1, very unlikely=0). Scores of the three theme-

1  
2  
3  
4  
5  
6  
7  
8  
9  
10  
11  
12  
13  
14  
15  
16  
17  
18  
19  
20  
21  
22  
23  
24  
25  
26  
27  
28  
29  
30  
31  
32  
33  
34  
35  
36  
37  
38  
39  
40  
41  
42  
43  
44  
45  
46  
47  
48  
49  
50  
51  
52  
53  
54  
55  
56  
57  
58  
59  
60

181 related questions were added up to provide a total for each category of barriers. Possible  
182 scores for each barrier category ranged from 0-9. A score of  $\geq 5$  was considered as an  
183 important barrier to overcome.<sup>31</sup> A copy of the used (Arabic & English) questionnaire  
184 can be found in online supplementary material (1&2).

185 To ensure common understanding and acceptability, an interview recording was  
186 undertaken in Muscat in 25 randomly selected adult with type 2 diabetes (population of  
187 interest) outside the sampled health centres of the study. Results were discussed and  
188 reviewed by the investigation team and an independent statistician.

189 Based on the data from the current study, the scale quality (27 item study questionnaire)  
190 including internal consistency reliability measures were investigated through the use of  
191 factor analysis using SPSS v22 and supported by McDonald's coefficient omega using  
192 the free and open source R.<sup>34 35</sup>

### 193 **Study size**

194 Power analysis was performed to estimate the prevalence of meeting PA  
195 recommendations in adult population with T2D in a parallel study conducted in the  
196 same population.<sup>30</sup> We assumed that meeting PA recommendation is at least in part  
197 facilitated by reporting fewer barriers to PA<sup>36</sup> and used an estimated 15% prevalence of  
198 adequate PA in patients with diabetes, as reported in the 2008 Oman World Health  
199 Survey (OWHS).<sup>37</sup> Using 95% confidence limits, a response rate of 80%, and a  
200 precision of +/-4%, and smallest expected frequency of 15%, the calculated sample size  
201 was ~300 participants across primary health centres in Muscat region, the capital of  
202 Oman.

1  
2  
3  
4  
5  
6  
7  
8  
9  
10  
11  
12  
13  
14  
15  
16  
17  
18  
19  
20  
21  
22  
23  
24  
25  
26  
27  
28  
29  
30  
31  
32  
33  
34  
35  
36  
37  
38  
39  
40  
41  
42  
43  
44  
45  
46  
47  
48  
49  
50  
51  
52  
53  
54  
55  
56  
57  
58  
59  
60

203 **Training**

204 A multidisciplinary team of two nurses, one senior dietician, one medical orderly and  
205 two doctors were recruited for data collection. A one day training on administration of  
206 the questionnaire was delivered by the national focal point on PA in Oman Ministry of  
207 Health. Data entry, cross-checking and cleaning was done through Epi Info™ 7 by an  
208 independent personnel. Entered data was transferred to SPSS v22 for analysis and  
209 subsequent results.

210 **Statistical methods**

211 Descriptive statistics were expressed as percentages and mean (SD), median (quartiles)  
212 to describe the study sample characteristics. Sum of scores from the three related  
213 questions per category (range from 0-9) were expressed as median (LQ, UQ).  
214 Correlations between the sum of scores of the nine barrier categories were tested.  
215 Furthermore, data were dichotomised to scores  $<5$  and  $\geq 5$  to determine the highly  
216 reported barriers as advised in the CDC questionnaire and practised in a study in Saudi  
217 Arabia.<sup>31</sup> Chi-square analysis was carried out to identify the distribution of the high  
218 barrier scores ( $\geq 5$ ) across the independent sociodemographic factors including gender  
219 (male vs female); age (to ensure sufficient power and adequate numbers for further  
220 statistical analysis the population was divided by the mean age  $\leq 57$  vs  $< 57$  years);  
221 marital status (currently unmarried vs married); education (those unable to read or write  
222 (“uneducated”) vs. those having attended primary school or beyond (“educated”);  
223 household income ( $<500$  vs  $\geq 500$  Omani rials - ‘OR’); and employment (unemployed,  
224 including those retired vs employed). Self-reported stage of change in PA was  
225 expressed as one of two categories: inactive if reporting “pre-contemplation” or  
226 “contemplation” and potentially active if reporting being at “preparation”, “action”, or

1  
2 227 “maintenance” stages of PA. Corrected P-values (Yate’s continuity) were reported for  
3  
4 228 high barrier scores against the studied independent variables.

5  
6 229 Principal components analysis (PCA) was performed to identify composite scores for  
7  
8 230 the components underlying the items/questions in the study scale. A nine factor solution  
9  
10 231 was used to investigate the contributions of the 27 item/questions to the nine barrier  
11  
12 232 categories.<sup>38</sup> Furthermore, factor loading matrix was examined using Oblimin rotation<sup>39</sup>  
13  
14  
15 233 where correlations between the extracted components were obtained.

## 16 17 18 19 234 **RESULTS**

### 20 21 22 235 **Socio-demographic**

23  
24 236 Out of 312 patients approached, 305 (98%) completed the questionnaire. Slightly more  
25  
26 237 females were represented in this sample (57.4%) than males. The population was  
27  
28 238 slightly older with mean (SD) age of 57(10.8) years. Additionally, more than two-thirds  
29  
30 239 being married (78.8%) and just about half unable to read or write (48.9%). More than a  
31  
32 240 third of the study population (39.3%) reported household income of <500 OR (less than  
33  
34 241 national average)<sup>40</sup> and the majority (77%) reported unemployment (including  
35  
36 242 retirement). More males than females were educated (70% vs 37%) and employed (45%  
37  
38 243 vs 7%) (Table 1).

### 39 40 41 42 244 **Physiological status**

43  
44 245 Median (LQ, UQ) duration of diabetes in this population was 6.0 (4.0, 10.0) years. The  
45  
46 246 majority of the participants had hypertension (n=217, 71%) or/and hyperlipidaemia  
47  
48 247 (n=189, 62%) coinciding with their diabetes. All of them were using anti-hypertensive  
49  
50 248 or/and lipid lowering medications as appropriate. More than three-quarters of those  
51  
52 249 taking anti-hypertensives (78%) and two-thirds of those using lipid lowering drugs  
53  
54 250 (66%) had blood pressure (BP) readings and fasting serum cholesterol within target  
55  
56  
57  
58  
59  
60

251 levels (BP<140/80 mmHg and fasting serum cholesterol of <5mmol/l).<sup>41</sup> Fifteen percent  
 252 (n=45) were controlling their diabetes by diet alone versus 85% (n=260) on oral anti-  
 253 hypoglycaemic medications, in which 25% (n=75) were additionally on insulin. Mean  
 254 (SD) BMI was 31.0 (6.0) kg/m<sup>2</sup> where 89% (n=271) had BMI >25kg/m<sup>2</sup> in which 50%  
 255 (n=153) were obese (BMI>30 kg/m<sup>2</sup>) and 39% (n=118) were overweight (BMI>25-  
 256 29.99 kg/m<sup>2</sup>). Glycated haemoglobin HbA1c was >7% (>48 mmol/mol) in more than  
 257 half of the population (58%) indicating poor diabetes control (Table 1).

### 258 Self-reported stages of PA

259 Only 17% (n=52) of participants considered themselves actively participating in regular  
 260 moderate or vigorous PA (22% of males vs 13% of females). Of the remainder, the  
 261 majority reported being “not ready” (37%), “getting ready” (31%) or in “preparation”  
 262 (15%) (Table 1).

263 **Table 1: Selected participants characteristics**

| Population characteristics   | Total population<br>n=305(100%) |
|------------------------------|---------------------------------|
| <b>Gender</b>                |                                 |
| Male                         | 130(42.6)                       |
| Female                       | 175(57.4)                       |
| <b>Age (years)</b>           |                                 |
| ≤57                          | 155(51)                         |
| >57                          | 150(49)                         |
| <b>Marital status</b>        |                                 |
| Currently unmarried          | 65(21)                          |
| Currently married            | 240(79)                         |
| <b>Education</b>             |                                 |
| Not educated                 | 149(49)                         |
| Educated                     | 156(51)                         |
| <b>Income</b>                |                                 |
| <500 OR                      | 120(39)                         |
| ≥500 OR                      | 185(61)                         |
| <b>Employment</b>            |                                 |
| Not employed                 | 234(77)                         |
| Employed                     | 71(23)                          |
| <b>Physiological</b>         |                                 |
| Duration of diabetes (years) | Median (LQ, UQ)                 |

|                                                   |                                       |          |     |
|---------------------------------------------------|---------------------------------------|----------|-----|
|                                                   |                                       | 6(4, 10) |     |
| <b>Self-reported comorbidities*</b>               |                                       |          |     |
|                                                   | Yes                                   | 277(91)  | 265 |
|                                                   | No                                    | 28 (9)   | 266 |
| <b>Current medication</b>                         |                                       |          |     |
|                                                   | Anti-HTN                              | 217(71)  | 269 |
|                                                   | Lipid lowering drugs                  | 189(62)  | 270 |
|                                                   | Oral-hypoglycaemic drugs              | 260(85)  | 271 |
|                                                   | Oral-hypoglycaemic drugs with Insulin | 75(25)   | 272 |
|                                                   | Diet control                          | 45(15)   | 274 |
| <b>Blood pressure (systolic/diastolic) mmHg**</b> |                                       |          |     |
|                                                   | Within target (<140/<80)              | 237(78)  | 277 |
|                                                   | High (≥140/≥80)                       | 68(22)   | 278 |
| <b>Fasting lipid profile (mmol/l)**</b>           |                                       |          |     |
|                                                   | Cholesterol within target (< 5.0)     | 201(66)  | 281 |
|                                                   | Cholesterol high (≥5.0)               | 104(34)  | 282 |
| <b>Body Mass Index (kg/m2)**</b>                  |                                       |          |     |
|                                                   | Healthy weight range (18.5-24.99)     | 34(11)   | 285 |
|                                                   | Overweight (>25-29.99)                | 118(39)  | 286 |
|                                                   | Obese (>30)                           | 153(50)  | 287 |
| <b>HbA1c(%)**(&gt;48 mmol/mol)</b>                |                                       |          |     |
|                                                   | Normal ≤7%                            | 127(42)  | 290 |
|                                                   | High >7%                              | 178(58)  | 291 |
| <b>Self-reported stages of PA</b>                 |                                       |          |     |
|                                                   | Not ready (Pre-contemplation)         | 112(37)  | 293 |
|                                                   | Getting ready(contemplation)          | 95(31)   | 294 |
|                                                   | Preparation                           | 46(15)   | 295 |
|                                                   | Action                                | 14(5)    | 296 |
|                                                   | Maintenance                           | 38(12)   | 298 |
|                                                   |                                       |          | 299 |

\*Reported hypertension, hyperlipidaemia, thyroid dysfunction or any other chronic condition coinciding with diabetes.  
\*\*Oman diabetes mellitus management guidelines (2015)<sup>41</sup>

### 300 CDC questionnaire on barriers to leisure PA

301 For the 27 items/questions scale, McDonald's coefficient Omega was equal to 0.750  
 302 indicating moderate reliability of the scale.<sup>38</sup> Further, PCA analysis with 9 components  
 303 solution generally supported the previous found subscales (three questions per barrier  
 304 category) in barriers to performing PA mainly component 2, 4, 5, 6, and 9 representing  
 305 fear from injury, environmental barriers, religious barriers, lack of willpower, and lack  
 306 of resources respectively (see supplementary materials 3). However, cross contributions  
 307 were evident in four out of the nine extracted components namely component 1 (lack of  
 308 willpower, time, energy and skills), component 3 (lack of time and energy), component



1  
2  
3  
4  
5  
6  
7  
8  
9  
10  
11  
12  
13  
14  
15  
16  
17  
18  
19  
20  
21  
22  
23  
24  
25  
26  
27  
28  
29  
30  
31  
32  
33  
34  
35  
36  
37  
38  
39  
40  
41  
42  
43  
44  
45  
46  
47  
48  
49  
50  
51  
52  
53  
54  
55  
56  
57  
58  
59  
60

309 7 (lack of social support and skills), and component 8 (lack of social support and  
310 energy).

311 Each of the subscales for the nine studied barriers had good reliability [McDonald's  
312 coefficient Omega was equal to 0.900]. Based on this, further results are presented  
313 using sum scores.

314 The majority of the population, 97.7% (n=298), reported at least one barrier to  
315 performing leisure physical activity median (LQ, UQ) was 6 (4, 7). Population  
316 distributions were not normal across all reported barrier categories. Median sum scores  
317 were all <5 as illustrated in (Figure 1). Except for reporting lack of willpower and lack  
318 of resources, 75% of sum scores of other reported barriers were  $\leq 5$ .

319  
320  
321  
322  
323  
324  
325  
326  
327  
328  
329  
330  
331  
332  
333  
334  
335

---

INSERT FIGURE 1 ABOUT HERE

---

322 Categorizing barrier scores to  $<5$  and  $\geq 5$  (significant barrier) highlighted that 'lack of  
323 willpower' (n=139), 'lack of resources' (n=93) and 'lack of social support' (n=89) were  
324 the most frequently reported 'significant barriers' to physical activity (Figure 2).  
325 Barriers found to be significant in both males and females were lack of willpower  
326 (41.5% m: 48.6% f) and lack of resources (32.3% m: 29.1% f). In addition, lack of time  
327 in males (26.9%) and lack of social support in females (35.4%) were also noteworthy  
328 (Table 2).

329  
330  
331  
332  
333  
334  
335

---

INSERT FIGURE 2 ABOUT HERE

---

332 Correlations between the sum scores of the nine studied barriers were generally weak  
333 ( $R < 0.200$ ). Positive and significant correlations of  $>0.300$  were noted among lack of  
334 energy with lack of time; lack of skill with lack of social support; lack of energy and  
335 lack of willpower; lack of skills with lack of willpower; and fear of injury with lack of

|                        | Lack of time | Lack of social support | Lack of energy | Lack of willpower | Fear of injury | Lack of skill | Lack of resources | Religious barriers | Environmental barriers |
|------------------------|--------------|------------------------|----------------|-------------------|----------------|---------------|-------------------|--------------------|------------------------|
| Lack of time           | 1.000        | .134*                  | .464*          | .118*             | -.116*         | .035          | .013              | -.092              | .013                   |
| Lack of social support | .134*        | 1.000                  | .125*          | .288*             | .262*          | .430*         | .083              | .011               | .039                   |
| Lack of energy         | .464*        | .125*                  | 1.000          | .306*             | -.013          | .178*         | .171*             | -.070              | .099                   |
| Lack of willpower      | .118*        | .288*                  | .306*          | 1.000             | .058           | .497*         | .260*             | -.112              | .053                   |
| Fear of injury         | -.116*       | .262*                  | -.013          | .058              | 1.000          | .338*         | -.218*            | .032               | -.090                  |
| Lack of skill          | .035         | .430*                  | .178*          | .497*             | .338*          | 1.000         | .182*             | -.052              | .005                   |
| Lack of resources      | .013         | .083                   | .171*          | .260*             | -.218*         | .182*         | 1.000             | .038               | .281*                  |
| Religious barriers     | -.092        | .011                   | -.070          | -.112             | .032           | -.052         | .038              | 1.000              | .007                   |
| Environmental barriers | .013         | .039                   | .099           | .053              | -.090          | .005          | .281*             | .007               | 1.000                  |

336 skills (Table 2). Interestingly, no significant correlations were seen within the religious  
 337 and environmental barriers except for one weak significant positive correlation between  
 338 lack of resources and environmental barriers.

339 **Table 2: Correlations between sum scores of barrier categories**

340 \*P-value <0.050

341  
 342 Distributions of significant high barrier score ( $\geq 5$ ) across the studied sociodemographic  
 343 factors and self-reported stages of change in PA differed among the nine barrier  
 344 categories: “Lack of time” was frequently highly scored by males, younger adults and  
 345 those who were married, employed or educated. Additionally, “Lack of social support”  
 346 was highly scored by females and “Lack of energy” by employed, or educated adults.  
 347 However, “Lack of willpower” was highly scored by individuals with lower income, or  
 348 at inactive stages of PA. Moreover, “Fear of injury” was highly scored by older adults,  
 349 unemployed, uneducated, or individuals reporting in-active stages of PA. Furthermore,  
 350 “Lack of skills” was highly scored by females, younger adults, and unemployed or  
 351 uneducated. “Lack of resources” on the other hand, was frequently highly scored by  
 352 married adults or with lower income. It is notable that the religious and environmental

1  
2 353 barriers had no significant different distributions across any of the studied factors (Table  
3  
4 354 3).  
5  
6  
7  
8  
9  
10  
11  
12  
13  
14  
15  
16  
17  
18  
19  
20  
21  
22  
23  
24  
25  
26  
27  
28  
29  
30  
31  
32  
33  
34  
35  
36  
37  
38  
39  
40  
41  
42  
43  
44  
45  
46  
47  
48  
49  
50  
51  
52  
53  
54  
55  
56  
57  
58  
59  
60

For peer review only

**Table 3: Distribution of high barrier scores ( $\geq 5$ ) to leisure physical activity in adult population with type 2 diabetes across sociodemographic variables and self-reported stages of change in physical activity (n=305).**

| (%) Scores $\geq 5$ | Lack of time | Lack of social support | Lack of energy | Lack of willpower | Fear of injury | Lack of skills | Lack of resources | Religious barriers | Environmental barriers |
|---------------------|--------------|------------------------|----------------|-------------------|----------------|----------------|-------------------|--------------------|------------------------|
| Gender:             |              |                        |                |                   |                |                |                   |                    |                        |
| Male                | 26.6         | 20.8                   | 21.5           | 41.5              | 24.6           | 13.1           | 32.3              | 3.8                | 10.0                   |
| Female              | 15.4         | 35.4                   | 16.0           | 48.6              | 26.3           | 28.0           | 29.1              | 4.6                | 13.1                   |
| Corrected $\chi^2$  | 5.4          | 7.1                    | 1.2            | 1.2               | 0.04           | 8.9            | 0.2               | 0.001              | 0.4                    |
| (P-value)           | (0.020)*     | (0.008)*               | (0.278)        | (0.270)           | (0.843)        | (0.003)*       | (0.640)           | (0.981)            | (0.508)                |
| Age:                |              |                        |                |                   |                |                |                   |                    |                        |
| $\leq 57$           | 27.7         | 26.5                   | 21.3           | 45.8              | 18.7           | 16.1           | 33.5              | 4.5                | 12.3                   |
| $> 57$              | 12.7         | 32.0                   | 15.3           | 45.3              | 32.7           | 27.3           | 27.3              | 4.0                | 11.3                   |
| Corrected $\chi^2$  | 9.7          | 0.9                    | 1.4            | 0.0               | 7.1            | 5.0            | 1.1               | 0.00               | 0.0                    |
| (P-value)           | (0.002)*     | (0.347)                | (0.232)        | (1.000)           | (0.008)*       | (0.025)*       | (0.292)           | (1.000)            | (0.942)                |
| Marital status:     |              |                        |                |                   |                |                |                   |                    |                        |
| Unmarried           | 10.8         | 35.4                   | 16.9           | 43.1              | 30.8           | 24.6           | 18.5              | 7.7                | 13.8                   |
| Married             | 22.9         | 27.5                   | 18.8           | 46.3              | 24.2           | 20.8           | 33.8              | 3.3                | 11.3                   |
| Corrected $\chi^2$  | 3.9          | 1.2                    | 0.0            | 0.1               | 0.9            | 0.2            | 4.9               | 1.4                | 0.1                    |
| (P-value)           | (0.047)*     | (0.277)                | (0.875)        | (0.753)           | (0.356)        | (0.626)        | (0.026)*          | (0.231)            | (0.720)                |
| Employment:         |              |                        |                |                   |                |                |                   |                    |                        |
| Un-employed         | 12.4         | 31.6                   | 14.5           | 47.0              | 29.5           | 25.6           | 31.6              | 4.7                | 11.5                   |
| Employed            | 46.5         | 21.1                   | 31.0           | 40.8              | 12.7           | 8.5            | 26.8              | 2.8                | 12.7                   |
| Corrected $\chi^2$  | 37.0         | 2.4                    | 8.8            | 0.6               | 7.2            | 8.5            | 0.4               | 0.1                | 0.0                    |
| (P-value)           | (<0.001)*    | (0.120)                | (0.003)*       | (0.437)           | (0.007)*       | (0.004)*       | (0.527)           | (0.740)            | (0.960)                |
| Education:          |              |                        |                |                   |                |                |                   |                    |                        |
| Un-educated         | 11.4         | 33.6                   | 13.4           | 45.6              | 35.6           | 28.2           | 29.5              | 6.0                | 10.7                   |
| Educated            | 28.8         | 25.0                   | 23.1           | 45.5              | 16.0           | 15.4           | 31.4              | 2.6                | 12.8                   |
| Corrected $\chi^2$  | 13.2         | 2.3                    | 4.1            | 0.0               | 14.2           | 6.6            | 0.1               | 1.5                | 0.1                    |

1  
2  
3  
4  
5  
6  
7  
8  
9  
10  
11  
12  
13  
14  
15  
16  
17  
18  
19  
20  
21  
22  
23  
24  
25  
26  
27  
28  
29  
30  
31  
32  
33  
34  
35  
36  
37  
38  
39  
40  
41  
42  
43  
44  
45  
46  
47  
48  
49

|                             |           |         |          |          |           |          |          |         |         |
|-----------------------------|-----------|---------|----------|----------|-----------|----------|----------|---------|---------|
| (P-value)                   | (<0.001)* | (0.129) | (0.042)* | (1.0)    | (<0.001)* | (0.010)* | (0.816)  | (0.162) | (0.700) |
| Income:                     |           |         |          |          |           |          |          |         |         |
| <500                        | 16.7      | 26.7    | 21.7     | 54.2     | 20.8      | 23.3     | 40.0     | 5.8     | 8.3     |
| >=500                       | 22.7      | 30.8    | 16.2     | 40.0     | 28.6      | 20.5     | 24.3     | 3.2     | 14.1    |
| Corrected $\chi^2$          | 1.3       | 0.4     | 1.1      | 5.3      | 1.9       | 0.2      | 7.7      | 0.6     | 1.8     |
| (P-value)                   | (0.257)   | (0.516) | (0.294)  | (0.021)* | (0.163)   | (0.663)  | (0.005)* | (0.422) | (0.183) |
| Self-reported stages of PA: |           |         |          |          |           |          |          |         |         |
| Not active                  | 18.4      | 28.5    | 17.9     | 50.7     | 31.9      | 24.2     | 29.5     | 4.3     | 13.5    |
| Active                      | 24.5      | 30.6    | 19.4     | 34.7     | 12.2      | 16.3     | 32.7     | 4.1     | 8.2     |
| Corrected $\chi^2$          | 1.2       | 0.1     | 0.0      | 6.2      | 12.5      | 2.0      | 0.2      | 0.00    | 1.4     |
| (P-value)                   | (0.276)   | (0.808) | (0.873)  | (0.012)* | (<0.001)* | (0.161)  | (0.667)  | (1.0)   | (0.244) |

\* Significant at P<0.050

For peer review only

## 1 DISCUSSION

2 Despite evidence on the effectiveness of meeting PA levels in the management of T2D,  
3 and associated cardiovascular risk factors,<sup>6 7</sup> PA is poorly addressed in routine diabetes  
4 care.<sup>42</sup> Low PA levels in populations with T2D are consistently reported in western  
5 countries, for example, USA<sup>43</sup> as well as Arabic speaking countries namely Oman,  
6 Saudi Arabia and Lebanon.<sup>2 44 45</sup> Addressing perceived barriers to performing  
7 recommended PA levels in this population is crucial for planning effective PA  
8 promoting interventions.

9 Within a series of formative studies to inform a culturally congruent PA intervention in  
10 diabetes care,<sup>46</sup> this study has looked at perceived barriers to performing leisure time  
11 physical activity in an adult population with T2D attending primary care using an  
12 adapted CDC questionnaire translated to Arabic language.<sup>14</sup>

13 The current findings relating to willpower, resources and social support were also  
14 reported as the top three barriers to PA in the Saudi population attending primary care  
15 by AlQuaiz (2009).<sup>14</sup> In the West, USA in particular, the strongest reported barriers to  
16 physical activity among adults with T2D were pain (41%), followed by lack of  
17 willpower (27%), and poor health (21%).<sup>47</sup>

18 In the current study, lack of willpower was significantly highly reported by individuals  
19 from low income households. This finding is similar to a Canadian study which  
20 reported a negative association between financial position and on intention to participate  
21 in leisure-time physical activity in adult population with T2D in Canada.<sup>48</sup> Additionally  
22 in a study in USA, older individuals with low income who were found to be depressed  
23 had low participation in social activities and less odds of engaging in PA.<sup>49</sup> None the  
24 less, more evidence is needed to explain how income alters the willpower for  
25 performing leisure PA in Arabic speaking countries namely Oman. Comparably, lack

1  
2 26 of willpower was more likely to be reported by individuals at inactive stages of physical  
3  
4 27 activity (pre-contemplation or contemplation stages of physical activity) than those in  
5  
6 28 active stages. Progressive stages of behavioural change according to the trans-  
7  
8 29 theoretical model were direct correlates to PA in a review article by Trost (2002)<sup>50</sup> and  
9  
10 30 direct determinants in another by Van Stralen (2009).<sup>51</sup> This finding supports the need  
11  
12 31 for programs to help raise self-willpower/determination through stepped process of  
13  
14 32 behaviour change from inactive (pre-contemplation) to active stages of PA (action and  
15  
16 33 maintenance).<sup>52</sup> Interestingly, fear of injury was the only other reported barrier  
17  
18 34 significantly different between individuals at inactive vs active stages of change in PA.  
19  
20 35 This could be explained by possible physical constraints pertaining to older age<sup>49</sup> and  
21  
22 36 existing comorbidities in the current study population triggering fear of injuries  
23  
24 37 associated with PA.  
25  
26  
27

28  
29 38 Limited resources including high cost and limited facilities for PA have been reported  
30  
31 39 as significant barriers to PA across different cultures.<sup>20 22</sup> In the current study, limited  
32  
33 40 resources were reported as significant by individuals who were married and those with  
34  
35 41 low income. Married individuals could have more financial commitments to their  
36  
37 42 families especially in the Gulf Cooperation Council countries where extended families  
38  
39 43 are common.<sup>53</sup> This may alter an individual's priorities for house-hold income  
40  
41 44 expenditure. Low income was similarly reported as a barrier in a Saudi population,  
42  
43 45 possibly due to the perceived high cost of utilising PA facilities.<sup>14</sup> This may reflect a  
44  
45 46 narrow view on what constitutes PA and a misconception that expensive equipment is  
46  
47 47 required. Hence, irrespective of culture, interventions promoting cost neutral PA such as  
48  
49 48 walking in populations would be highly desirable to overcome this barrier.<sup>46 54</sup>  
50  
51  
52

53  
54 49 Lack of social support was frequently reported by females in this study. Meeting  
55  
56 50 cultural norms and social expectations related to safety, security and conservative dress  
57  
58 51 mainly for females were reported as barriers to PA in South Asian (Pakistani and  
59  
60

1  
2 52 Indian) British populations<sup>18 21</sup> and populations in Arabic countries such as Qatar.<sup>55</sup>  
3  
4 53 Evaluation of interventions to provide the necessary social support and networks to PA  
5  
6 54 specifically for women with T2D, particularly in the countries of the Gulf Cooperation  
7  
8 55 Council are warranted. Activities including group-based activities and buddying,<sup>56-58</sup>  
9  
10 56 are worth further investigation.  
11  
12  
13 57 Other reported barriers such as fear of injury and lack of skills varied across subgroups  
14  
15 58 in particular, older, unemployed, and uneducated individuals. Older individuals with  
16  
17 59 T2D are more vulnerable to have poor vision and osteoarthritic changes that may cause  
18  
19 60 fall and injuries.<sup>59</sup> Moreover the negative influence of pain to PA in older population  
20  
21 61 with T2D was reported in western countries,<sup>47</sup> and hence potential barriers to  
22  
23 62 individuals' participation. These results suggest that programs to promote PA should be  
24  
25 63 individualized for type, frequency and intensity of PA and incorporate safety measures  
26  
27 64 to prevent PA induced pain and injuries in older individuals.<sup>60</sup>  
28  
29  
30  
31 65 Lack of time on the other hand, has been a highly cited barrier to PA in the general  
32  
33 66 population as well as populations with diabetes.<sup>15-18 21 22 47 61</sup> However, unlike the study  
34  
35 67 by Alquaiz (2009), significant scores for lack of time in this study were higher in males  
36  
37 68 compared to females<sup>14</sup> along-with a lack of energy, which may be a reflection of the fact  
38  
39 69 that more males than females were educated and employed. This perception of 'lack of  
40  
41 70 time', in addition to family and social commitments may jeopardized their time for PA  
42  
43 71 especially if individuals were younger and married. This discussion highlights the  
44  
45 72 importance of changing people's perceptions of PA but also consideration of  
46  
47 73 opportunities in other PA domains namely work and travel that could enable individuals  
48  
49 74 with less leisure time to increase overall PA and behaviour.  
50  
51  
52  
53  
54 75 Factors which are independent of an individual's decision-making, such as environment  
55  
56 76 and religion had no significant associations in the current study despite the hot weather  
57  
58 77 during data collection of this study in April/May. These null results, may be real or may  
59  
60



1  
2 78 be due to the wording of the questions and their interpretation. To address these gaps in  
3  
4 79 the literature, a qualitative exploration of possible environmental, including seasonal  
5  
6 80 variations, and religious factors affecting PA performance may be warranted.  
7

8  
9 81 Moreover, PCA showed cross contribution of items/questions within lack of willpower,  
10  
11 82 time, energy and skills indicating doubtful responses. Similarly inputs from questions  
12  
13 83 on lack of social support and lack of skills and energy were mixed. Future  
14  
15 84 questionnaires on barriers to performing PA, especially in the Arabic speaking  
16  
17 85 countries, should consider more specific questions.  
18

19  
20 86 Additionally, results of this study cannot be generalised across all regions in Oman.  
21  
22 87 More information is required from rural Omani communities where perceptions on PA  
23  
24 88 may be different. Despite the excellent scale reliability measures in the current data, the  
25  
26 89 results cannot be generalized due to possible differences in scale quality across various  
27  
28 90 data.<sup>38</sup> Moreover, due to the cross-sectional design of this study, causal inferences  
29  
30 91 cannot be drawn.  
31

32  
33  
34 92 Finally, future attempts to explore barriers to PA should equally include work and travel  
35  
36 93 domains to cater for diversities in both PA behaviour and sedentary lifestyle across  
37  
38 94 subgroups of adults with T2D.  
39

## 40 41 42 95 **CONCLUSION** 43

44  
45 96 This study identified lack of willpower, low resources and low social support  
46  
47 97 (especially in females) as the most common barriers to performing leisure PA. The  
48  
49 98 current findings can be used to inform the design of physical activity interventions for  
50  
51 99 testing in clinical trials. The specific areas which might be usefully included to address  
52  
53 100 barriers to performing PA are a) assessment of individuals' readiness to change b) low  
54  
55 101 cost options for PA resources and social support c) approaches aimed at increasing  
56  
57 102 individuals' understanding of what constitutes PA and d) methods that are flexible and  
58  
59  
60

1  
2 103 tailored to the specific needs of subgroups of adults with T2D. In addition, approaches  
3  
4 104 that enhance self-efficacy (and will power) and social support should be included.  
5  
6

7 105 **ETHICAL CONSIDERATION**  
8  
9

10 106 Ethical approval was obtained from the Regional Research Committee in Muscat, Oman  
11  
12 107 Ministry of Health. All eligible participants provided informed consent prior to data  
13  
14 108 collection. For illiterate individuals, consents to participate in this study were provided  
15  
16 109 by their accompanying support member (spouse, son or daughter).  
17  
18  
19

20 110 **COMPETING INTERESTS**  
21  
22

23 111 The authors declare that they have no competing interests.  
24  
25

26 112 **FUNDING**  
27  
28

29 113 The Oman Ministry of Health funded this project as part of a PhD grant offered to the  
30  
31 114 corresponding author.  
32  
33  
34

35 115 **AUTHORS' CONTRIBUTION**  
36  
37

38 116 TS is the principal investigator in charge of the project. SM, YA, EB, AC and ASA  
39  
40 117 have all been involved in designing the intervention and the evaluation. TS prepared the  
41  
42 118 initial draft of the manuscript and all other authors have contributed. All authors have  
43  
44 119 critically reviewed and approved the final version of the manuscript.  
45  
46  
47

48 120 **ACKNOWLEDGEMENTS**  
49  
50

51 121 We would like to thank Dr. Ahmed Al-Qasmi, Director General of Directorate of  
52  
53 122 Planning and Dr. Fatma Al-Ajmi, Director General of Health Services, Muscat in Oman  
54  
55 123 Ministry of Health for their support and constant supervision. Additionally, special  
56  
57 124 thanks to Dr. Adil Al-Wahaibi for his assistance with the study statistics.  
58  
59  
60

1  
2 125 **DATA SHARING STATEMENT** No additional data are available.  
3  
4

5 126 **REFERENCES**  
6  
7

- 8 127 1. International Diabetes Federation. IDF DIABETES ATLAS-7TH EDITION  
9  
10 128 Brussels, Belgium; 2015 [Available from: <http://www.diabetesatlas.org>  
11 129 May 2016.  
12 130 2. Al Riyami A, Abd Elaty MA, Morsi M, et al. Oman World Health Survey: Part 1 - methodology,  
13 131 sociodemographic profile and epidemiology of non-communicable diseases in Oman.  
14 132 *Oman Med J* 2012;27(5):425-43.  
15 133 3. World Health Organization. Physical activity  
16 134  
17  
18 135 WHO; 2014 [fact sheet]. Available from:  
19 136 <http://www.who.int/mediacentre/factsheets/fs385/en/> accessed 21st May 2014.  
20 137 4. Badran M, Laher I. Type II Diabetes Mellitus in Arabic-Speaking Countries. *International*  
21 138 *Journal Of Endocrinology* 2012;2012:902873-73. doi: 10.1155/2012/902873  
22 139 5. Oman Health Vision 2050. 2012.  
23 140 6. American Diabetes Association. Exercise and type 2 diabetes: American College of Sports  
24 141 Medicine and the American Diabetes Association: Joint Position Statement. *Medicine*  
25 142 *and Science in Sports and Exercise* 2010;42(12):2282-303. doi:  
26 143 10.1249/MSS.0b013e3181eeb61c  
27 144 7. Di Loreto C, Fanelli C, Lucidi P, et al. Make your diabetic patients walk: long-term impact of  
28 145 different amounts of physical activity on type 2 diabetes. *Diabetes care*  
29 146 2005;28(6):1295-302.  
30 147 8. World Health Organization. WHO's Global Recommendations on PA for Health 2010  
31 148 [Available from:  
32 149 [http://whqlibdoc.who.int/publications/2010/9789241599979\\_eng.pdf](http://whqlibdoc.who.int/publications/2010/9789241599979_eng.pdf).  
33 150 9. Heath GW, Parra DC, Sarmiento OL, et al. Evidence-based intervention in physical activity:  
34 151 lessons from around the world. *Lancet* 2012;380(9838):272-81. doi: 10.1016/S0140-  
35 152 6736(12)60816-2  
36 153 10. Morrato EH, Hill JO, Wyatt HR, et al. Physical activity in U.S. adults with diabetes and at risk  
37 154 for developing diabetes, 2003. *Diabetes care* 2007;30(2):203-09.  
38 155 11. Colberg SR, Sigal RJ, Fernhall B, et al. Exercise and type 2 diabetes: The American College of  
39 156 Sports Medicine and the American Diabetes Association: Joint position statement.  
40 157 *Diabetes care* 2010;33(12):e147-e67. doi: 10.2337/dc10-9990  
41 158 12. Arem H, Moore SC, Patel A, et al. Leisure time physical activity and mortality: a detailed  
42 159 pooled analysis of the dose-response relationship. *JAMA internal medicine*  
43 160 2015;175(6):959-67. doi: 10.1001/jamainternmed.2015.0533 [published Online First:  
44 161 2015/04/07]  
45 162 13. Hallman DM, Mathiassen SE, Gupta N, et al. Differences between work and leisure in  
46 163 temporal patterns of objectively measured physical activity among blue-collar workers.  
47 164 *BMC Public Health* 2015;15(1):976. doi: 10.1186/s12889-015-2339-4  
48 165 14. AlQuaiz et al. Barriers to a healthy lifestyle among patients attending primary care clinics at  
49 166 a university hospital in Riyadh. *Annals Of Saudi Medicine* 2009;29(1):30-35.  
50 167 15. Egan AM, Mahmood WAW, Fenton R, et al. Barriers to exercise in obese patients with type  
51 168 2 diabetes. *QJM: Monthly Journal Of The Association Of Physicians* 2013;106(7):635-  
52 169 38. doi: 10.1093/qjmed/hct075  
53 170 16. Korkiakangas EE, Alahuhta MA, Husman PM, et al. Motivators and barriers to exercise  
54 171 among adults with a high risk of type 2 diabetes--a qualitative study. *Scandinavian*  
55 172 *Journal Of Caring Sciences* 2011;25(1):62-69. doi: 10.1111/j.1471-6712.2010.00791.x  
56  
57  
58  
59  
60

- 173 17. Hume C, Dunstan D, Salmon J, et al. Are barriers to physical activity similar for adults with  
174 and without abnormal glucose metabolism? *The Diabetes Educator* 2010;36(3):495-  
175 502. doi: 10.1177/0145721710368326
- 176 18. Korhakangas EE, Alahuhta MA, Laitinen JH. Barriers to regular exercise among adults at  
177 high risk or diagnosed with type 2 diabetes: a systematic review. *Health Promotion*  
178 *International* 2009;24(4):416-27. doi: 10.1093/heapro/dap031
- 179 19. Labrunée M, Antoine D, Vergès B, et al. Effects of a home-based rehabilitation program in  
180 obese type 2 diabetics. *Annals Of Physical And Rehabilitation Medicine*  
181 2012;55(6):415-29. doi: 10.1016/j.rehab.2012.06.001
- 182 20. Booth AO, Lowis C, Dean M, et al. Diet and physical activity in the self-management of type  
183 2 diabetes: barriers and facilitators identified by patients and health professionals.  
184 *Primary Health Care Research & Development* 2013;14(3):293-306. doi:  
185 10.1017/S1463423612000412
- 186 21. Lawton J, Ahmad N, Hanna L, et al. 'I can't do any serious exercise': barriers to physical  
187 activity amongst people of Pakistani and Indian origin with Type 2 diabetes. *Health*  
188 *Education Research* 2006;21(1):43-54.
- 189 22. Mier N, Medina AA, Ory MG. Mexican Americans with type 2 diabetes: perspectives on  
190 definitions, motivators, and programs of physical activity. *Preventing chronic disease*  
191 2007;4(2):A24-A24.
- 192 23. Wanko NS, Brazier CW, Young-Rogers D, et al. Exercise preferences and barriers in urban  
193 African Americans with type 2 diabetes. *The Diabetes Educator* 2004;30(3):502-13.
- 194 24. Al-Otaibi HH. Measuring stages of change, perceived barriers and self efficacy for physical  
195 activity in Saudi Arabia. *Asian Pacific Journal Of Cancer Prevention: APJCP*  
196 2013;14(2):1009-16.
- 197 25. Amin TT, Suleman W, Ali A, et al. Pattern, prevalence, and perceived personal barriers  
198 toward physical activity among adult Saudis in Al-Hassa, KSA. *Journal Of Physical*  
199 *Activity & Health* 2011;8(6):775-84.
- 200 26. Ali HI, Baynouna LM, Bernsen RM. Barriers and facilitators of weight management:  
201 perspectives of Arab women at risk for type 2 diabetes. *Health & social care in the*  
202 *community* 2010;18(2):219-28. doi: 10.1111/j.1365-2524.2009.00896.x
- 203 27. Berger G, Peerson A. Giving young Emirati women a voice: participatory action research on  
204 physical activity. *Health & Place* 2009;15(1):117-24. doi:  
205 10.1016/j.healthplace.2008.03.003
- 206 28. Al-Kaabi J, Al-Maskari F, Saadi H, et al. Physical activity and reported barriers to activity  
207 among type 2 diabetic patients in the United arab emirates. *The Review Of Diabetic*  
208 *Studies: RDS* 2009;6(4):271-78. doi: 10.1900/RDS.2009.6.271
- 209 29. Serour M, Alqhenaei H, Al-Saqabi S, et al. Cultural factors and patients' adherence to  
210 lifestyle measures. *The British Journal Of General Practice: The Journal Of The Royal*  
211 *College Of General Practitioners* 2007;57(537):291-95.
- 212 30. Alghafri TS, Alharthi SM, Al-farsi Y, et al. Correlates of physical activity and sitting time in  
213 adults with type 2 diabetes attending primary health care in Oman. *BMC Public Health*  
214 2017;18(1):85. doi: 10.1186/s12889-017-4643-7
- 215 31. CDC USA. "Overcoming Barriers to Physical Activity": Centers for Disease Control and  
216 Prevention; 2011 [Available from: [https://www.cdc.gov/diabetes/ndep/pdfs/8-road-](https://www.cdc.gov/diabetes/ndep/pdfs/8-road-to-health-barriers-quiz-508.pdf)  
217 [to-health-barriers-quiz-508.pdf](https://www.cdc.gov/diabetes/ndep/pdfs/8-road-to-health-barriers-quiz-508.pdf)  
218 accessed 16 July 2014.
- 219 32. Enhancing the QUALity and Transparency Of health Research. The Strengthening the  
220 Reporting of Observational Studies in Epidemiology (STROBE) Statement: guidelines  
221 for reporting observational studies 2017 [Available from: [http://www.equator-](http://www.equator-network.org/reporting-guidelines/strobe/)  
222 [network.org/reporting-guidelines/strobe/](http://www.equator-network.org/reporting-guidelines/strobe/) accessed 22 January 2017.
- 223 33. Martin SB, Morrow JR, Jr., Jackson AW, et al. Variables related to meeting the CDC/ACSM  
224 physical activity guidelines. *Med Sci Sports Exerc* 2000;32(12):2087-92. [published  
225 Online First: 2000/12/29]

- 1  
2 226 34. Rik Crutzen & Gjalte-Jorn Ygram Peters. Scale quality: alpha is an inadequate estimate and  
3 227 factor-analytic evidence is needed first of all. *Health Psychology Review* 2015;1-6. doi:  
4 228 10.1080/17437199.2015.1124240
- 5 229 35. R Development Core Team. 2014 [Available from: [http://r-development-core-  
7 231 team.software.informer.com/](http://r-development-core-<br/>6 230 team.software.informer.com/)].
- 8 232 36. Heiss V, Petosa R. Correlates of Physical Activity Among Adults With Type 2 Diabetes: A  
9 233 Systematic Literature Review. *American Journal of Health Education* 2014;45(5):278-  
10 234 87. doi: 10.1080/19325037.2014.933139
- 11 235 37. Ministry of Health Oman. World Health Survey Report, Ministry of Health, Oman. In:  
12 236 studies DoRa, ed. Muscat., 2008.
- 13 237 38. Dunn TJ, Baguley T, Brunnsden V. From alpha to omega: a practical solution to the pervasive  
14 238 problem of internal consistency estimation. *British journal of psychology (London,  
15 239 England : 1953)* 2014;105(3):399-412. doi: 10.1111/bjop.12046 [published Online First:  
16 240 2014/05/23]
- 17 241 39. Youngblut JM. Comparison of Factor Analysis Options Using the Home/ Employment  
18 242 Orientation Scale. *Nursing research* 1993;42(2):122-24.
- 19 243 40. Ministry of National Economy Oman. Statistical Yearbook 2011. In: Ministry of National  
20 244 Economy O, Muscat, Oman, ed., 2011.
- 21 245 41. Ministry of Health Oman. Diabetes management guidelines In: centre E, ed. Oman: MOH,  
22 246 2015.
- 23 247 42. Matthews L, Kirk A, MacMillan F, et al. Can physical activity interventions for adults with  
24 248 type 2 diabetes be translated into practice settings? A systematic review using the RE-  
25 249 AIM framework. *Translational Behavioral Medicine* 2014;4(1):60-78.
- 26 250 43. Morrao EH, Hill JO, Wyatt HR, et al. Physical activity in U.S. adults with diabetes and at risk  
27 251 for developing diabetes, 2003. *Diabetes care* 2007;30(2):203-9. doi: 10.2337/dc06-  
28 252 1128 [published Online First: 2007/01/30]
- 29 253 44. Al-Nozha MM, Al-Hazzaa HM, Arafah MR, et al. Prevalence of physical activity and inactivity  
30 254 among Saudis aged 30-70 years. A population-based cross-sectional study. *Saudi  
31 255 medical journal* 2007;28(4):559-68. [published Online First: 2007/04/26]
- 32 256 45. Sibai AM, Costanian C, Tohme R, et al. Physical activity in adults with and without diabetes:  
33 257 from the 'high-risk' approach to the 'population-based' approach of prevention. *BMC  
34 258 Public Health* 2013;13:1002-02. doi: 10.1186/1471-2458-13-1002
- 35 259 46. Alghafri TS, Alharthi SM, Al-Farsi YM, et al. Study protocol for "MOVEdiabetes": a trial to  
36 260 promote physical activity for adults with type 2 diabetes in primary health care in  
37 261 Oman. *BMC Public Health* 2017;17(1):28. doi: 10.1186/s12889-016-3990-0 [published  
38 262 Online First: 2017/01/07]
- 39 263 47. Thomas N, Alder E, Leese GP. Barriers to physical activity in patients with diabetes.  
40 264 *Postgraduate Medical Journal* 2004;80(943):287-91.
- 41 265 48. Boudreau F, Godin G. Understanding physical activity intentions among French Canadians  
42 266 with type 2 diabetes: an extension of Ajzen's theory of planned behaviour. *The  
43 267 International Journal of Behavioral Nutrition and Physical Activity* 2009;6:35-35. doi:  
44 268 10.1186/1479-5868-6-35
- 45 269 49. Plow MA, Allen SM, Resnik L. Correlates of Physical Activity Among Low-Income Older  
46 270 Adults. *Journal of Applied Gerontology* 2011;30(5):629-42. doi:  
47 271 doi:10.1177/0733464810375685
- 48 272 50. Trost SG, Owen N, Bauman AE, et al. Correlates of adults' participation in physical activity:  
49 273 review and update. *Medicine And Science In Sports And Exercise* 2002;34(12):1996-  
50 274 2001.
- 51 275 51. van Stralen MM, De Vries H, Mudde AN, et al. Determinants of initiation and maintenance  
52 276 of physical activity among older adults: a literature review. *Health Psychology Review*  
53 277 2009;3(2):147-207. doi: 10.1080/17437190903229462
- 54 278 52. Kirk A, MacMillan F, Webster N. Application of the Transtheoretical model to physical  
55 279 activity in older adults with Type 2 diabetes and/or cardiovascular disease. *Psychology*  
56 280



- 1  
2 279 of Sport and Exercise 2010;11(4):320-24. doi:  
3 280 <http://dx.doi.org/10.1016/j.psychsport.2010.03.001>  
4 281 53. GCC statistical center. GCC-statistics 2010 [Available from: [https://gccstat.org/en/terms-of-](https://gccstat.org/en/terms-of-use13/10/2016)  
5 282 [use13/10/2016](https://gccstat.org/en/terms-of-use13/10/2016).  
6 283 54. Bird EL, Baker G, Mutrie N, et al. Behavior change techniques used to promote walking and  
7 284 cycling: a systematic review. *Health Psychol* 2013;32(8):829-38. doi:  
8 285 10.1037/a0032078 [published Online First: 2013/03/13]  
9 286 55. Donnelly TT, Al Suwaidi J, Al Enazi NR, et al. Qatari women living with cardiovascular  
10 287 diseases-challenges and opportunities to engage in healthy lifestyles. *Health Care For*  
11 288 *Women International* 2012;33(12):1114-34. doi: 10.1080/07399332.2012.712172  
12 289 56. Bastiaens H, Sunaert P, Wens J, et al. Supporting diabetes self-management in primary  
13 290 care: pilot-study of a group-based programme focusing on diet and exercise. *Primary*  
14 291 *Care Diabetes* 2009;3(2):103-09. doi: 10.1016/j.pcd.2009.02.001  
15 292 57. Matthews L. The feasibility, effectiveness and implementation of a physical activity  
16 293 consultation service for adults within routine diabetes care. [Implementation of  
17 294 physical activity services for the management of adults with Type 2 Diabetes].  
18 295 University of Strathclyde School of Psychological Sciences and Health, 2013.  
19 296 58. Barrera M, Strycker LA, Mackinnon DP, et al. Social-ecological resources as mediators of  
20 297 two-year diet and physical activity outcomes in type 2 diabetes patients. *Health*  
21 298 *Psychology: Official Journal Of The Division Of Health Psychology, American*  
22 299 *Psychological Association* 2008;27(2 Suppl):S118-S25. doi: 10.1037/0278-  
23 300 6133.27.2(Suppl.).S118  
24 301 59. Alberti KGMM, Zimmet PZ. Definition, diagnosis and classification of diabetes mellitus and  
25 302 its complications. Part 1: diagnosis and classification of diabetes mellitus. Provisional  
26 303 report of a WHO Consultation. *Diabet Med* 1998;15(7):539-53. doi:  
27 304 10.1002/(SICI)1096-9136(199807)15:7<539::AID-DIA668>3.0.CO;2-S  
28 305 60. Borschmann K, Moore K, Russell M, et al. Overcoming barriers to physical activity among  
29 306 culturally and linguistically diverse older adults: a randomised controlled trial.  
30 307 *Australasian Journal On Ageing* 2010;29(2):77-80. doi: 10.1111/j.1741-  
31 308 6612.2009.00390.x  
32 309 61. Donahue KE, Mielenz TJ, Sloane PD, et al. Identifying supports and barriers to physical  
33 310 activity in patients at risk for diabetes. *Preventing chronic disease* 2006;3(4):A119-A19.

311

312 **Figure 1: Box and Whisker plots for the reported barrier sum scores of 0-9 (high**  
313 **scores defined as  $\geq 5$ )**

314 **Figure 2: Percentage of reported high barrier scores ( $\geq 5$ )**



Figure 1: Box and Whisker plots for the reported barrier sum scores of 0-9 (high scores defined as  $\geq 5$ )

132x106mm (300 x 300 DPI)

1  
2  
3  
4  
5  
6  
7  
8  
9  
10  
11  
12  
13  
14  
15  
16  
17  
18  
19  
20  
21  
22  
23  
24  
25  
26  
27  
28  
29  
30  
31  
32  
33  
34  
35  
36  
37  
38  
39  
40  
41  
42  
43  
44  
45  
46  
47  
48  
49  
50  
51  
52  
53  
54  
55  
56  
57  
58  
59  
60

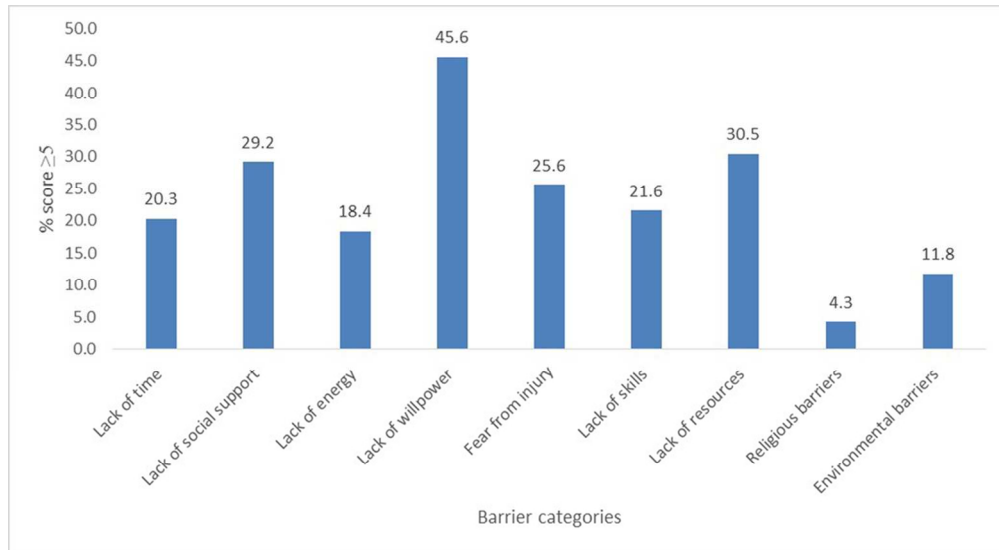

Figure 2: Percentage of reported high barrier scores ( $\geq 5$ )

96x53mm (300 x 300 DPI)

review only



| من فضلك أجب عن الأسئلة التالية |        |             |            |                                                                                                          |
|--------------------------------|--------|-------------|------------|----------------------------------------------------------------------------------------------------------|
| ٠                              | ١      | ٢           | ٣          |                                                                                                          |
| لا                             | نادراً | نعم أحياناً | نعم غالباً |                                                                                                          |
| أبداً                          |        |             |            |                                                                                                          |
|                                |        |             |            | ١ يومي مشغول جداً لذلك لا أستطيع أن أجعل لي وقت خاص بالتمارين ضمن جدولتي اليومي                          |
|                                |        |             |            | ٢ لا أحد من أفراد عائلتي أو أصدقائي يفضلون ممارسة الرياضة لذلك فأني لا أجد فرصة لممارستها                |
|                                |        |             |            | ٣ أكون متعب جداً بعد العمل فلا أستطيع ممارسة الرياضة                                                     |
|                                |        |             |            | ٤ كنت أفكر في زيادة التمارين الرياضية لكن لا يبدو أنني أستطيع البدء بذلك                                 |
|                                |        |             |            | ٥ أنني كبير في السن لذا فممارسة الرياضة تشكل خطراً على                                                   |
|                                |        |             |            | ٦ لا أمارس الرياضة كثيراً وذلك لأنني لم أتعلم مهارات إي نوع من أنواع الرياضة                             |
|                                |        |             |            | ٧ المسابح، المسارات، الدراجات ..... الخ غير متوفرة للاستخدام بالنسبة لي                                  |
|                                |        |             |            | ٨ ممارسة الرياضة تأخذ الكثير من وقت التزامات أخرى مثل وقت العمل والأسرة                                  |
|                                |        |             |            | ٩ أشعر بالخجل من منظري وأنا أمارس الرياضة مع الآخرين                                                     |
|                                |        |             |            | ١٠ أنا لا أحصل على القدر المكافئ من النوم فلا أستطيع الاستيقاظ مبكراً أو البقاء في الليل لممارسة الرياضة |
|                                |        |             |            | ١١ من الأسهل علي إيجاد عذر لعدم ممارسه الرياضه من الخروج لعمل شئ آخر                                     |
|                                |        |             |            | ١٢ أنا أعرف أناس كثيرين أدوا أنفسهم من كثرة ممارسة الرياضة                                               |
|                                |        |             |            | ١٣ أنا أرى أنه لا يمكن تعلم أي رياضه جديدة في مثل سني                                                    |
|                                |        |             |            | ١٤ أن ممارسة الرياضة أمر مكلف جداً فيجب على شراء أدوات رياضيه أو أخذ دروس رياضيه                         |
|                                |        |             |            | ١٥ وقت فراغي أثناء اليوم ضيق جداً لا يكفي لأداء التمارين الرياضية                                        |
|                                |        |             |            | ١٦ نشاطاتي الاجتماعية المعتادة مع العائلة والأصدقاء لا تتضمن أي نشاط رياضي                               |
|                                |        |             |            | ١٧ أنا متعبة جداً خلال أيام الأسبوع واحتاج أيام العطلة للراحة وليس للرياضة                               |
|                                |        |             |            | ١٨ أريد ان أمارس المزيد ولكن يبدو أنني لا أستطيع أن استمر على شئ معين                                    |
|                                |        |             |            | ١٩ أخاف ان أؤذي نفسي او أصاب بأزمه قلبيه                                                                 |
|                                |        |             |            | ٢٠ ليس لدي القدرة الكافية لتحويل ممارسة الرياضة لمتعه                                                    |
|                                |        |             |            | ٢١ لو كانت هناك أجهزه رياضية وغرف للاستحمام في موقع العمل لكان من الأرجح ان أقوم بالتمارين الرياضية      |
|                                |        |             |            | ٢٢ معتقداتي الدينيه لا تسمح لي بممارسه النشاط البدني                                                     |
|                                |        |             |            | ٢٣ الطقس (الحراو البرد الشديدين) لا يسمح لي بممارسه النشاط البدني                                        |
|                                |        |             |            | ٢٤ الملابس الرياضيه غير لا تتناسب مع مجتمعا                                                              |
|                                |        |             |            | ٢٥ النشاط البدني في الصيف غير مناسب لي                                                                   |
|                                |        |             |            | ٢٦ أخلاقيات الدينيه لا تسمح لي بممارسه النشاط البدني                                                     |
|                                |        |             |            | ٢٧ البيئه المحيطه لا يسمح لي بممارسه النشاط البدني                                                       |

| How likely are you to say?                                                                                            | Very likely<br>3 | Somewhat likely<br>2 | Somewhat unlikely<br>1 | Very unlikely<br>0 |
|-----------------------------------------------------------------------------------------------------------------------|------------------|----------------------|------------------------|--------------------|
| 1. My day is so busy now, I just don't think I can make the time to include physical activity in my regular schedule. |                  |                      |                        |                    |
| 2. None of my family members or friends like to do anything active, so I don't have a chance to exercise.             |                  |                      |                        |                    |
| 3. I'm just too tired after work to get any exercise.                                                                 |                  |                      |                        |                    |
| 4. I've been thinking about getting more exercise, but I just can't seem to get started                               |                  |                      |                        |                    |
| 5. I'm getting older so exercise can be risky.                                                                        |                  |                      |                        |                    |
| 6. I don't get enough exercise because I have never learned the skills for any sport.                                 |                  |                      |                        |                    |
| 7. I don't have access to jogging trails, swimming pools, bike paths, etc.                                            |                  |                      |                        |                    |
| 8. Physical activity takes too much time away from other commitments—time, work, family, etc.                         |                  |                      |                        |                    |
| 9. I'm embarrassed about how I will look when I exercise with others.                                                 |                  |                      |                        |                    |
| 10. I don't get enough sleep as it is. I just couldn't get up early or stay up late to get some exercise.             |                  |                      |                        |                    |
| 11. It's easier for me to find excuses not to exercise than to go out to do something.                                |                  |                      |                        |                    |
| 12. I know of too many people who have hurt themselves by overdoing it with exercise.                                 |                  |                      |                        |                    |
| 13. I really can't see me learning a new sport at my age.                                                             |                  |                      |                        |                    |
| 14. It's just too expensive. You have to take a class or join a club or buy the right equipment.                      |                  |                      |                        |                    |
| 15. My free times during the day are too short to include exercise.                                                   |                  |                      |                        |                    |
| 16. My usual social activities with family or friends do not include physical activity                                |                  |                      |                        |                    |
| 17. I'm too tired during the week and I need the weekend to catch up on my rest.                                      |                  |                      |                        |                    |
| 18. I want to get more exercise, but I just can't seem to make myself stick to anything.                              |                  |                      |                        |                    |
| 19. I'm afraid I might injure myself or have a heart attack.                                                          |                  |                      |                        |                    |
| 20. I'm not good enough at any physical activity to make it fun.                                                      |                  |                      |                        |                    |
| 21. If we had exercise facilities and showers at work, then I would be more likely to exercise.                       |                  |                      |                        |                    |
| 22. my religious believes are not supportive for PA                                                                   |                  |                      |                        |                    |
| 23. extreme hot weather is an obstacle                                                                                |                  |                      |                        |                    |
| 24. sports cloths are not culturally appropriate                                                                      |                  |                      |                        |                    |
| 25. PA in the summer times is not convenient to me                                                                    |                  |                      |                        |                    |
| 26. My religious thoughts are against performing PA                                                                   |                  |                      |                        |                    |
| 27. the environment around be is not supportive for PA                                                                |                  |                      |                        |                    |

## Factor analysis and reliability test results

Initially, the factorability of the 27 items/questions was examined. The Kaiser-Meyer-Olkin (KMO) measure of sampling adequacy was 0.711, above the commonly recommended value of 0.600. Bartlett's test of sphericity (test of at least one significant correlation between 2 of the items studied) was also significant ( $\chi^2(351) = 2600.175, p < .05$ ).<sup>1</sup> The communalities (proportion of item's variance explained by the extracted factors) were all above 0.300, further confirming that each item shared some common variance with other items. Given these overall indicators, factor analysis was regarded to be suitable with all the 27 items/questions.

PCA for 9 components solution namely lack of willpower/time/energy and skills, fear of injury, lack of time/ lack of energy, environmental barriers, religious barriers, lack of willpower, lack of skills/ social support and lack of resources, explained 13.1%, 11.4%, and 9.2%, 9.0%, 7.2%, 5.1%, 4.3%, 3.8% and 3.6% of the variance respectively.

None of the 27 items were eliminated because they all met a minimum criteria of having a primary factor loading (how much a factor explains a variable) of 0.4 or above. Solutions for the nine components were examined using Oblimin rotation of the factor loading matrix. The factor loading matrix for this final solution is presented in Table 1. All factor loadings were in the same direction of the barrier categories used in the current study where a set of three items instructed a barrier category mainly component 2, 4, 5, 6, and 9 representing fear from injury, environmental barriers, religious barriers, lack of willpower, and lack of resources respectively. However, cross contributions were evident in four out of the nine extracted components namely component 1 (lack of willpower, time, energy and skills), component 3 (lack of time and energy), component 7 (lack of social support and skills), and component 8 (lack of social support and energy). Component correlation matrix, presented in table 2, shows weak correlations between the extracted nine components  $<0.200$  except for the correlations of

0.201 and -0.204 between component 6 (lack of willpower) with 7 (combination of lack of skills and social support) and 2 (fear of injury) with 9 (lack of resources) respectively.

McDonald's coefficient Omega was equal to 0.750 indicating moderate reliability of the 27 items/questions scale.<sup>2</sup>

**Table 1: The extracted components and factor loadings based on a principal components analysis with Oblimin rotation for the 27 items/questions used in the current study (N = 305)**

| Items/<br>questions | Extracted components (1-9)* |      |      |      |      |       |       |       |       |
|---------------------|-----------------------------|------|------|------|------|-------|-------|-------|-------|
|                     | 1                           | 2    | 3    | 4    | 5    | 6     | 7     | 8     | 9     |
| Q4                  | .503                        |      |      |      |      | -.502 |       |       |       |
| Q19                 |                             | .879 |      |      |      |       |       |       |       |
| Q12                 |                             | .801 |      |      |      |       |       |       |       |
| Q5                  |                             | .791 |      |      |      |       |       |       |       |
| Q1                  |                             |      | .745 |      |      |       |       |       |       |
| Q15                 |                             |      | .743 |      |      |       |       |       |       |
| Q17                 |                             |      | .721 |      |      |       |       |       |       |
| Q3                  | .351                        |      | .604 |      |      |       |       |       |       |
| Q8                  | -.423                       |      | .468 |      |      |       |       |       |       |
| Q24                 |                             |      |      | .922 |      |       |       |       |       |
| Q26                 |                             |      |      | .909 |      |       |       |       |       |
| Q22                 |                             |      |      | .839 |      |       |       |       |       |
| Q25                 |                             |      |      |      | .899 |       |       |       |       |
| Q23                 |                             |      |      |      | .871 |       |       |       |       |
| Q27                 |                             |      |      |      | .777 |       |       |       |       |
| Q20                 |                             |      |      |      |      | -.788 |       |       |       |
| Q11                 |                             |      |      |      |      |       |       |       |       |
| Q18                 |                             |      |      |      |      | -.748 |       |       |       |
| Q16                 |                             |      |      |      |      |       | -.789 |       |       |
| Q13                 |                             |      |      |      |      |       | -.712 |       |       |
| Q6                  | .470                        |      |      |      |      |       |       | -.538 |       |
| Q2                  |                             |      |      |      |      |       |       |       | -.390 |

|   |     |      |  |  |  |  |  |      |      |
|---|-----|------|--|--|--|--|--|------|------|
| 3 | Q9  |      |  |  |  |  |  | .819 |      |
| 4 | Q10 | .383 |  |  |  |  |  | .622 |      |
| 5 | Q14 |      |  |  |  |  |  |      | .802 |
| 6 | Q7  |      |  |  |  |  |  |      | .765 |
| 7 | Q21 |      |  |  |  |  |  |      | .761 |

\*1=lack of willpower/energy/time/skills, 2=fear of injury, 3=lack of time/ lack of energy, 4=environmental barriers, 5=religious barriers, 6=lack of willpower, 7=lack of skills/ social support, 8=lack of energy/social support and 9=lack of resources.

**Table 2: Component correlation matrix**

| Extracted components* | 1     | 2     | 3     | 4     | 5     | 6     | 7     | 8     | 9     |
|-----------------------|-------|-------|-------|-------|-------|-------|-------|-------|-------|
| 1                     | 1.000 | -.008 | .017  | .028  | -.046 | -.151 | -.049 | .020  | .149  |
| 2                     | -.008 | 1.000 | -.099 | -.023 | .025  | -.028 | -.199 | .000  | -.204 |
| 3                     | .017  | -.099 | 1.000 | .063  | -.117 | -.127 | -.043 | .145  | .009  |
| 4                     | .028  | -.023 | .063  | 1.000 | .014  | .004  | -.016 | .051  | .019  |
| 5                     | -.046 | .025  | -.117 | .014  | 1.000 | .062  | -.014 | -.034 | -.021 |
| 6                     | -.151 | -.028 | -.127 | .004  | .062  | 1.000 | .207  | -.153 | -.125 |
| 7                     | -.049 | -.199 | -.043 | -.016 | -.014 | .207  | 1.000 | -.134 | -.009 |
| 8                     | .020  | .000  | .145  | .051  | -.034 | -.153 | -.134 | 1.000 | .014  |
| 9                     | .149  | -.204 | .009  | .019  | -.021 | -.125 | -.009 | .014  | 1.000 |

\*1=lack of willpower/energy/time/skills, 2=fear of injury, 3=lack of time/ lack of energy, 4=environmental barriers, 5=religious barriers, 6=lack of willpower, 7=lack of skills/ social support, 8=lack of energy/social support and 9=lack of resources.

Further Factor analysis and reliability tests were conducted on the studied barrier subscales (3 questions per barrier). Table 3 provide factor loadings and McDonald’s coefficient Omega for all the nine subscales used in the current study indicating excellent sub-scale quality.

**Table 3: Factor loadings and McDonald’s coefficient Omega for the study subscales**

| Barrier categories     | Items/questions | factor loadings | Omega |
|------------------------|-----------------|-----------------|-------|
| Lack of time           | Q15             | 0.826           | 0.900 |
|                        | Q1              | 0.798           |       |
|                        | Q8              | 0.618           |       |
| Lack of social support | Q16             | 0.734           | 0.900 |
|                        | Q2              | 0.680           |       |
|                        | Q9              | 0.534           |       |
| Lack of energy         | Q3              | 0.755           | 0.900 |
|                        | Q17             | 0.720           |       |
|                        | Q10             | 0.581           |       |
| Lack of willpower      | Q18             | 0.837           | 0.900 |
|                        | Q4              | 0.746           |       |
|                        | Q11             | 0.691           |       |

|                        |     |       |       |
|------------------------|-----|-------|-------|
| Fear of injury         | Q19 | 0.904 | 0.900 |
|                        | Q12 | 0.823 |       |
|                        | Q5  | 0.803 |       |
| Lack of skills         | Q6  | 0.840 | 0.900 |
|                        | Q13 | 0.646 |       |
|                        | Q20 | 0.560 |       |
| Lack of resources      | Q7  | 0.837 | 0.900 |
|                        | Q21 | 0.831 |       |
|                        | Q14 | 0.754 |       |
| Religious barriers     | Q25 | 0.905 | 0.900 |
|                        | Q23 | 0.872 |       |
|                        | Q27 | 0.786 |       |
| Environmental barriers | Q24 | 0.924 | 0.900 |
|                        | Q26 | 0.913 |       |
|                        | Q22 | 0.847 |       |

1. Tobias S, Carlson JE. BRIEF REPORT: BARTLETT'S TEST OF SPHERICITY AND CHANCE FINDINGS IN FACTOR ANALYSIS. *Multivariate Behavioral Research* 1969;4(3):375-77. doi: 10.1207/s15327906mbr0403\_8
2. Dunn TJ, Baguley T, Brunnsden V. From alpha to omega: a practical solution to the pervasive problem of internal consistency estimation. *British journal of psychology (London, England : 1953)* 2014;105(3):399-412. doi: 10.1111/bjop.12046 [published Online First: 2014/05/23]

STROBE Statement—checklist of items that should be included in reports of observational studies

|                           | Item No | Page number (where information can be found in the manuscript) |
|---------------------------|---------|----------------------------------------------------------------|
| Title and abstract        | 1       | 1 & 2-3                                                        |
| <b>Introduction</b>       |         |                                                                |
| Background/rationale      | 2       | 4                                                              |
| Objectives                | 3       | 5                                                              |
| <b>Methods</b>            |         |                                                                |
| Study design              | 4       | 5                                                              |
| Setting                   | 5       | 6                                                              |
| Participants              | 6       | 6                                                              |
|                           |         |                                                                |
| Variables                 | 7       | 6                                                              |
| Data sources/ measurement | 8       | 6                                                              |
| Bias                      | 9       | 7                                                              |
| Study size                | 10      | 8                                                              |
| Quantitative variables    | 11      | 8                                                              |
| Participants              | 13      | 8                                                              |
| <b>Results</b>            |         |                                                                |
| Descriptive data          | 14      | 8-9                                                            |
| Outcome data              | 15      | 10-14                                                          |
| Main results              | 16      | 14-15                                                          |
| Other analyses            | 17      | 15                                                             |
| <b>Discussion</b>         |         |                                                                |
| Key results               | 18      | 16-18                                                          |
| Limitations               | 19      | 19                                                             |
| Interpretation            | 20      | 19                                                             |
| Generalisability          | 21      | 19                                                             |
| <b>Other information</b>  |         |                                                                |
| Funding                   | 22      | 20                                                             |
