# Supplementary material for: Perceived barriers to leisure time physical activity in adults with type 2 diabetes attending primary healthcare in Oman: a cross-sectional survey
Source: PubMed Central journal article supplement — BMJ Open. 2017 Nov 3;7(11):e016946. doi: 10.1136/bmjopen-2017-016946 (PMC5722082; doi:10.1136/bmjopen-2017-016946), 2017-11-03
Supplement: bmjopen-2017-016946supp001.pdf [file bmjopen-2017-016946supp001.pdf]

| من فضلك أجب عن الأسئلة التالية |                   |                     |                    |                                                                                                          |
|--------------------------------|-------------------|---------------------|--------------------|----------------------------------------------------------------------------------------------------------|
| ٠<br>لا<br>أبداً               | ١<br>لا<br>نادراً | ٢<br>نعم<br>أحياناً | ٣<br>نعم<br>غالباً |                                                                                                          |
|                                |                   |                     |                    | ١ يومي مشغول جداً لذلك لا أستطيع أن أجعل لي وقت خاص بالتمارين ضمن جدولتي اليومي                          |
|                                |                   |                     |                    | ٢ لا أحد من أفراد عائلتي أو أصدقائي يفضلون ممارسة الرياضة لذلك فأني لا أجد فرصة لممارستها                |
|                                |                   |                     |                    | ٣ أكون متعب جداً بعد العمل فلا أستطيع ممارسة الرياضة                                                     |
|                                |                   |                     |                    | ٤ كنت أفكر في زيادة التمارين الرياضية لكن لا يبدو أنني أستطيع البدء بذلك                                 |
|                                |                   |                     |                    | ٥ أنني كبير في السن لذا فممارسة الرياضة تشكل خطراً على                                                   |
|                                |                   |                     |                    | ٦ لا أمارس الرياضة كثيراً وذلك لأنني لم أتعلم مهارات إي نوع من أنواع الرياضة                             |
|                                |                   |                     |                    | ٧ المسابح، المسارات، الدراجات ..... الخ غير متوفرة للاستخدام بالنسبة لي                                  |
|                                |                   |                     |                    | ٨ ممارسة الرياضة تأخذ الكثير من وقت التزامات أخرى مثل وقت العمل والاسرة                                  |
|                                |                   |                     |                    | ٩ أشعر بالخجل من منظري وأنا أمارس الرياضة مع الآخرين                                                     |
|                                |                   |                     |                    | ١٠ أنا لا أحصل على القدر المكافئ من النوم فلا أستطيع الاستيقاظ مبكراً أو البقاء في الليل لممارسة الرياضة |
|                                |                   |                     |                    | ١١ من الأسهل علي إيجاد عذر لعدم ممارسه الرياضه من الخروج لعمل شئ آخر                                     |
|                                |                   |                     |                    | ١٢ أنا أعرف أناس كثيرين أدوا أنفسهم من كثرة ممارسة الرياضة                                               |
|                                |                   |                     |                    | ١٣ أنا أرى أنه لا يمكن تعلم أي رياضه جديدة في مثل سني                                                    |
|                                |                   |                     |                    | ١٤ أن ممارسة الرياضة أمر مكلف جداً فيجب على شراء ادوات رياضيه أو أخذ دروس رياضيه                         |
|                                |                   |                     |                    | ١٥ وقت فراغي أثناء اليوم ضيق جداً لا يكفي لأداء التمارين الرياضية                                        |
|                                |                   |                     |                    | ١٦ نشاطاتي الاجتماعية المعتادة مع العائلة والأصدقاء لا تتضمن أي نشاط رياضي                               |
|                                |                   |                     |                    | ١٧ أنا متعبة جداً خلال أيام الأسبوع واحتاج أيام العطلة للراحة وليس للرياضة                               |
|                                |                   |                     |                    | ١٨ أريد ان أمارس المزيد ولكن يبدو أنني لا أستطيع أن استمر على شئ معين                                    |
|                                |                   |                     |                    | ١٩ أخاف ان أؤذي نفسي او أصاب بأزمه قلبيه                                                                 |
|                                |                   |                     |                    | ٢٠ ليس لدي القدرة الكافية لتحويل ممارسة الرياضة لمتعه                                                    |
|                                |                   |                     |                    | ٢١ لو كانت هناك أجهزه رياضية وغرف للاستحمام في موقع العمل لكان من الأرجح ان أقوم بالتمارين الرياضية      |
|                                |                   |                     |                    | ٢٢ معتقداتي الدينيه لا تسمح لي بممارسه النشاط البدني                                                     |
|                                |                   |                     |                    | ٢٣ الطقس (الحراو البرد الشديدين) لا يسمح لي بممارسه النشاط البدني                                        |
|                                |                   |                     |                    | ٢٤ الملابس الرياضيه غير لا تتناسب مع مجتمعا                                                              |
|                                |                   |                     |                    | ٢٥ النشاط البدني في الصيف غير مناسب لي                                                                   |
|                                |                   |                     |                    | ٢٦ أخلاقياتي الدينيه لا تسمح لي بممارسه النشاط البدني                                                    |
|                                |                   |                     |                    | ٢٧ البيئه المحيطة لا يسمح لي بممارسه النشاط البدني                                                       |
